# Supplementary material
Source: PubMed Central journal article supplement (PMC2992331)
Supplement: NIHMS229173-supplement-2_si_002.pdf [file NIHMS229173-supplement-2_si_002.pdf]

## Supporting Information

### Unexpected Facile $C_{\text{carbene}}-X$ (X: I, Br, Cl) Reductive Elimination From N-Heterocyclic Carbene Copper Halides Under Oxidative Conditions

Bo-Lin Lin, Peng Kang, and T. Daniel P. Stack \*

*Department of Chemistry, Stanford University, Stanford, California  
94305, USA*

**Section 1.** General experimental information ..... S2-S3

**Section 2.** X-ray crystal structures of  $2_{\text{Cl}}\cdot\text{SbF}_6\cdot\text{CH}_2\text{Cl}_2$ ,  $2_{\text{Br}}\cdot\text{CF}_3\text{SO}_3\cdot\text{CH}_2\text{Cl}_2$ ,  $2_{\text{Cl}}\cdot\text{SbF}_6\cdot\text{CH}_2\text{Cl}_2$ , and  $\text{IPrCu}(\text{CF}_3\text{SO}_3)$  ..... S4-S47

**Section 3.** Computational data ..... S48-S74

**General Information:** All air and/or moisture sensitive compounds were manipulated in a glove box under a N<sub>2</sub> atmosphere. Dry acetonitrile was obtained by elution through a Innovative Technology solvent purification system. IPrCuCl, Cu(CF<sub>3</sub>SO<sub>3</sub>)<sub>2</sub>, [Cp<sub>2</sub>Fe]<sup>+</sup>PF<sub>6</sub><sup>-</sup>, [Ph<sub>2</sub>I]<sup>+</sup>PF<sub>6</sub><sup>-</sup>, NO<sup>+</sup>SbF<sub>6</sub><sup>-</sup>, and Selectfluor<sup>®</sup> were purchased from Sigma-Aldrich. IPrCuF, IPrCuBr, and IPrCuI were synthesized according to literature procedures.<sup>s1</sup> A modified literature procedure was used to prepare [(1, 10-phenanthroline)<sub>3</sub>Fe<sup>III</sup>]<sup>3+</sup>.<sup>s2</sup> <sup>1</sup>H, <sup>13</sup>C, and <sup>19</sup>F NMR spectra were recorded at room temperature (RT) using a Varian Mercury 400 (<sup>1</sup>H, 400 MHz, <sup>13</sup>C, 125.9 MHz, and <sup>19</sup>F, 376.4 MHz) spectrometer. <sup>1</sup>H and <sup>13</sup>C NMR spectra were referenced to TMS using the residual proto- signal of the solvent. <sup>19</sup>F NMR spectra were referenced to CFC<sub>3</sub>. Chemical shifts are reported using the standard δ notation in parts per million, and coupling constant are reported in Hz. Multiplicities are reported as follows: singlet (s), doublet (d), triplet (t), heptet (h). Cyclic voltammetry was performed using a BAS CV-50W voltammetric analyzer, a Ag wire reference electrode, a platinum disk working electrode, and a platinum wire counter electrode with 0.1 M Bu<sub>4</sub>NPF<sub>6</sub> solutions in acetonitrile (room temperature and *ca.* -40 °C) or propionitrile (room temperature and *ca.* -78 °C) with variable scan rates (50 to 1V/s). Ferrocene was used as an internal standard. Low-temperature UV-vis spectroscopy was performed using a Cary 50 spectrometer with a custom-designed immersible fiber-optic quartz probe with a variable path length (1 and 10 mm; Hellma, Inc.). Constant low temperatures were maintained by a dry ice/acetonitrile or dry ice/acetone bath. Solution temperatures were monitored directly by insertion of an Omega temperature probe in the solutions. The Notre Dame X-ray Crystallography Laboratory provided the X-ray analysis. Stanford University Mass Spectroscopy Laboratory provided the high-resolution mass spectroscopic analysis.

**Synthesis of 2<sub>Cl</sub>·SbF<sub>6</sub>:** NO<sup>+</sup>SbF<sub>6</sub><sup>-</sup> (18 mg, 0.68 mmol) and [Cu(CH<sub>3</sub>CN)<sub>4</sub>]<sup>+</sup>SbF<sub>6</sub><sup>-</sup> (36 mg, 0.078 mmol) were dissolved in MeCN (1 ml) and fully mixed at RT under N<sub>2</sub>. To the resultant blue solution was added IPrCuCl (15 mg, 0.031 mmol). The solution turns light blue immediately upon mixing. The solvent was removed under vacuum to give a solid residue, to which was added 5 ml deionized water and several drops of 1N aqueous ammonia. The mixture was extracted with 5 ml CH<sub>2</sub>Cl<sub>2</sub> (3x), and the solvent of the combined organic fractions was removed to give a white powder, 2<sub>Cl</sub>·SbF<sub>6</sub> (20 mg, 99% yield). <sup>1</sup>H NMR (CD<sub>2</sub>Cl<sub>2</sub>): 1.25 (d, 6H, <sup>3</sup>J<sub>HH</sub> 6.8), 1.31 (d, 6H, <sup>3</sup>J<sub>HH</sub> 6.8), 2.34 (h, 2H, <sup>3</sup>J<sub>HH</sub> 6.8), 7.48 (d, 4H, <sup>3</sup>J<sub>HH</sub> 8.0), 7.72 (t, 2H, <sup>3</sup>J<sub>HH</sub> 8.0), 7.86 (s, 2H); <sup>13</sup>C NMR (CD<sub>2</sub>Cl<sub>2</sub>): 23.46, 24.07, 29.69, 125.70, 126.58, 128.42, 133.34, 134.80, 145.36; <sup>19</sup>F NMR (CD<sub>2</sub>Cl<sub>2</sub>): -153.7. HRMS [2<sub>Cl</sub>]<sup>+</sup> found 423.2559, calculated 423.2567. Crystals suitable for X-ray structural analysis (2<sub>Cl</sub>·SbF<sub>6</sub>·CH<sub>2</sub>Cl<sub>2</sub>) were obtained by thermal diffusion of pentane into a 2<sub>Cl</sub>·SbF<sub>6</sub>/CH<sub>2</sub>Cl<sub>2</sub> solution at RT.<sup>s3</sup>

**Synthesis of 2<sub>Br</sub>·CF<sub>3</sub>SO<sub>3</sub>:** Cu(CF<sub>3</sub>SO<sub>3</sub>)<sub>2</sub> (29 mg, 0.08 mmol) and IPrCuBr (21 mg, 0.039 mmol) was dissolved in MeCN (1 ml) and fully mixed at RT under N<sub>2</sub>. A colorless solution was obtained immediately. The solvent was removed under vacuum to give a solid residue to which was added 5 ml deionized water and several drops of 1N aqueous ammonia. The mixture was extracted with 5 ml CH<sub>2</sub>Cl<sub>2</sub> (3x), and the solvent of the combined organic fractions were removed to give a white powder, 2<sub>Br</sub>·CF<sub>3</sub>SO<sub>3</sub> (24 mg,

98% yield).  $^1\text{H}$  NMR ( $\text{CD}_2\text{Cl}_2$ ): 1.26 (d, 6H,  $^3J_{\text{HH}}$  6.8), 1.29 (d, 6H,  $^3J_{\text{HH}}$  6.8), 2.30 (h, 2H,  $^3J_{\text{HH}}$  6.8), 7.46 (d, 4H,  $^3J_{\text{HH}}$  8.0), 7.70 (t, 2H,  $^3J_{\text{HH}}$  8.0), 8.13 (s, 2H);  $^{13}\text{C}$  NMR ( $\text{CD}_2\text{Cl}_2$ ): 23.31, 24.27, 29.65, 125.28, 125.60, 128.45, 129.80, 133.11, 144.75, 145.24;  $^{19}\text{F}$  NMR ( $\text{CD}_2\text{Cl}_2$ ): -80.3. HRMS [ $\mathbf{2}_{\text{Br}}\text{I}_3$ ] $^+$  found 467.2046, calculated 467.2062. Crystals suitable for X-ray structural analysis ( $\mathbf{2}_{\text{Br}}\cdot\text{CF}_3\text{SO}_3\cdot\text{CH}_2\text{Cl}_2$ ) were obtained by thermal diffusion of pentane into a  $\mathbf{2}_{\text{Cl}}\cdot\text{SbF}_6/\text{CH}_2\text{Cl}_2$  solution at RT.<sup>s3</sup>

**Synthesis of  $\mathbf{2}_{\text{I}}\text{I}_3$ :**  $\text{I}_2$  (104 mg, 0.409 mmol) and  $\text{IPrCuCl}$  (59 mg, 0.121 mmol) was dissolved in MeCN (1 ml) and fully mixed at RT in air. A brown solution was obtained immediately. Solvent removal under vacuum gave a solid residue to which were added 5 ml deionized water and several drops of 1N aqueous ammonia. The mixture was extracted with 5 ml  $\text{CH}_2\text{Cl}_2$  (3x), and the solvent of the combined organic fractions was removed to give a brown powder,  $\mathbf{2}_{\text{I}}\text{I}_3$  (108 mg, 99% yield).  $^1\text{H}$  NMR ( $\text{CD}_2\text{Cl}_2$ ): 1.26 (d, 6H,  $^3J_{\text{HH}}$  6.8), 1.32 (d, 6H,  $^3J_{\text{HH}}$  6.8), 2.27 (h, 2H,  $^3J_{\text{HH}}$  6.8), 7.46 (d, 4H,  $^3J_{\text{HH}}$  8.0), 7.71 (t, 2H,  $^3J_{\text{HH}}$  8.0), 7.79 (s, 2H);  $^{13}\text{C}$  NMR ( $\text{CD}_2\text{Cl}_2$ ): 23.33, 24.79, 29.68, 113.07, 125.59, 127.71, 131.79, 132.93, 145.16. HRMS [ $\mathbf{2}_{\text{I}}\text{I}_3$ ] $^+$  found 515.1924, calculated 515.1923. Crystals suitable for X-ray structural analysis ( $\mathbf{2}_{\text{I}}\text{I}_3$ ) were obtained by slow evaporation of a  $\mathbf{2}_{\text{I}}\text{I}_3/\text{CH}_2\text{Cl}_2$  solution at RT.

**General Procedure for Oxidations of  $\text{IPrCuX}$  (F, Cl, Br, and I) with Selectfluor<sup>®</sup> or  $\text{Cu}(\text{CF}_3\text{SO}_3)_2$ :**

$\text{IPrCuX}$  (X = Cl, Br, and I) and an appropriate amount of oxidant were dissolved in  $\text{CD}_3\text{CN}$  (0.75 ml) and fully mixed at RT under  $\text{N}_2$ .  $^1\text{H}$  NMR of the resulting  $\mathbf{2}_{\text{X}}$  (X = Cl, Br, and I) indicated a quantitative formation if a sufficient amount of oxidant was used. Reactions run in air led to same yields of  $\mathbf{2}_{\text{X}}$ .

$\text{IPrCu}(\text{CF}_3\text{SO}_3)$  was quantitatively formed in reaction of  $\text{IPrCuF}$  with *ca.* 2 eq.  $\text{Cu}(\text{CF}_3\text{SO}_3)_2$ . The  $^1\text{H}$  NMR spectrum of  $\text{IPrCu}(\text{CF}_3\text{SO}_3)$  is consistent with literature data.<sup>s3</sup> Crystals suitable for X-ray structural analysis were obtained by thermal diffusion of pentane into a  $\text{IPrCu}(\text{CF}_3\text{SO}_3)/\text{CH}_2\text{Cl}_2$  solution at RT. It should be noted that an X-ray crystal structure of  $\text{IPrCu}(\text{CF}_3\text{SO}_3)$  has been reported.<sup>s3</sup>

**Reference:**

- s1. (a)  $\text{IPrCuF}$ : Herron, J. R.; Ball, Z. T. *J. Am. Chem. Soc.* **2008**, *130*, 16486-16487. (b)  $\text{IPrCuBr}$  and  $\text{IPrCuI}$ : Liu, J. M.; Zhang, R. Z.; Wang, S. F.; Sun, W.; Xia, C. G. *Org. Lett.* **2009**, *11*, 1321-1324.
- s2.  $[(1, 10\text{-phenanthroline})_3\text{Fe}^{\text{III}}]^{3+}$  was obtained by oxidation of  $[(1, 10\text{-phenanthroline})_3\text{Fe}^{\text{II}}](\text{OTf})_2$  with  $\text{NO}^+\text{SbF}_6$  in MeCN. (Wong, C. L.; Kochi, J. K. *J. Am. Chem. Soc.* **1977**, *101*, 5593-5603.)
- s3. During the preparation of this manuscript, a free carbene route for the synthesis of  $\mathbf{2}_{\text{Cl}}$  and  $\mathbf{2}_{\text{Br}}$  was reported: Mendoza-Espinosa, D.; Donnadiou, B.; Bertrand, G. *J. Am. Chem. Soc.* **2010**, *132*, 7264-7265.
- s4. Goj, L. A.; Blue, E. D.; Delp, S. A.; Gunnoe, T. B.; Cundari, T. R.; Petersen, J. L. *Organometallics* **2006**, *25*, 4097-4104.

Figure S1. Crystal structure for  $2\text{Cl} \cdot \text{SbF}_6 \cdot \text{CH}_2\text{Cl}_2$ .

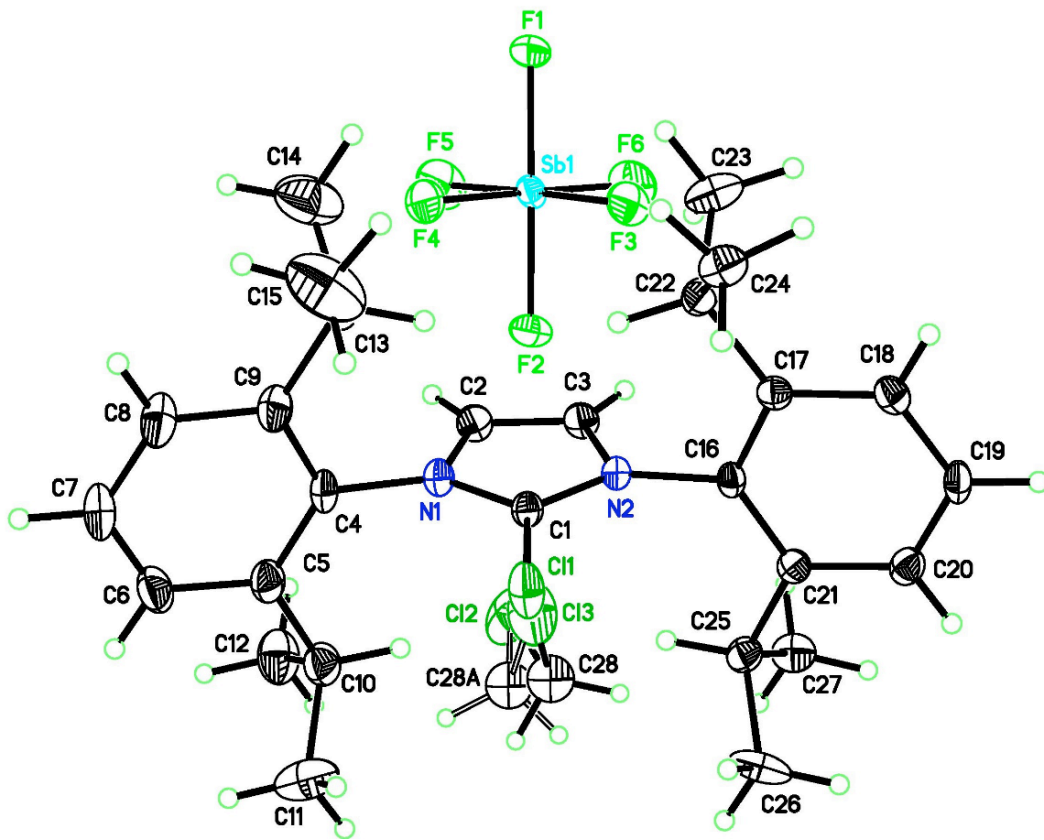

Table S1. Crystal data and structure refinement for  $2\text{C}_1\text{SbF}_6\cdot\text{CH}_2\text{Cl}_2$ .

|                                        |                                                                                                                                                          |
|----------------------------------------|----------------------------------------------------------------------------------------------------------------------------------------------------------|
| Empirical formula                      | $\text{C}_{28}\text{H}_{38}\text{Cl}_3\text{F}_6\text{N}_2\text{Sb}$                                                                                     |
| Formula weight                         | 744.70                                                                                                                                                   |
| Temperature                            | 100(2) K                                                                                                                                                 |
| Wavelength                             | 1.54178 Å                                                                                                                                                |
| Crystal system                         | triclinic                                                                                                                                                |
| Space group                            | P-1                                                                                                                                                      |
| Unit cell dimensions                   | $a = 10.37220(10)$ Å $\alpha = 77.6800(10)^\circ$<br>$b = 11.18180(10)$ Å $\beta = 75.8820(10)^\circ$<br>$c = 16.0498(2)$ Å $\gamma = 66.3380(10)^\circ$ |
| Volume                                 | 1639.43(3) Å <sup>3</sup>                                                                                                                                |
| Z                                      | 2                                                                                                                                                        |
| Density (calculated)                   | 1.509 g.cm <sup>-3</sup>                                                                                                                                 |
| Absorption coefficient ( $\mu$ )       | 9.405 mm <sup>-1</sup>                                                                                                                                   |
| F(000)                                 | 752                                                                                                                                                      |
| Crystal size                           | 0.44 × 0.12 × 0.07 mm <sup>3</sup>                                                                                                                       |
| $\theta$ range for data collection     | 2.86 to 69.73°                                                                                                                                           |
| Index ranges                           | -12 ≤ h ≤ 12, -13 ≤ k ≤ 13, -19 ≤ l ≤ 19                                                                                                                 |
| Reflections collected                  | 16090                                                                                                                                                    |
| Independent reflections                | 5778 [R <sub>int</sub> = 0.0200]                                                                                                                         |
| Completeness to $\theta = 69.73^\circ$ | 93.3 %                                                                                                                                                   |
| Absorption correction                  | Numerical                                                                                                                                                |
| Max. and min. transmission             | 0.6520 and 0.2308                                                                                                                                        |
| Refinement method                      | Full-matrix least-squares on F <sup>2</sup>                                                                                                              |
| Data / restraints / parameters         | 5778 / 0 / 368                                                                                                                                           |
| Goodness-of-fit on F <sup>2</sup>      | 1.032                                                                                                                                                    |
| Final R indices [I > 2σ(I)]            | R <sub>1</sub> = 0.0290, wR <sub>2</sub> = 0.0720                                                                                                        |
| R indices (all data)                   | R <sub>1</sub> = 0.0308, wR <sub>2</sub> = 0.0733                                                                                                        |
| Largest diff. peak and hole            | 0.951 and -0.630 e <sup>-</sup> .Å <sup>-3</sup>                                                                                                         |

Table S2. Atomic coordinates and equivalent isotropic displacement parameters ( $\text{\AA}^2$ ) for  $2\text{C}_1\text{rSbF}_6\cdot\text{CH}_2\text{Cl}_2$ .  $U(\text{eq})$  is defined as one third of the trace of the orthogonalized  $U_{ij}$  tensor.

|        | x            | y           | z            | $U(\text{eq})$ |
|--------|--------------|-------------|--------------|----------------|
| Cl(1)  | 0.64690(8)   | 0.08164(6)  | 0.28934(4)   | 0.028(1)       |
| N(1)   | 0.5062(2)    | 0.3170(2)   | 0.20714(13)  | 0.018(1)       |
| N(2)   | 0.5032(2)    | 0.3191(2)   | 0.34284(13)  | 0.015(1)       |
| C(1)   | 0.5486(3)    | 0.2430(3)   | 0.27989(16)  | 0.016(1)       |
| C(2)   | 0.4330(3)    | 0.4457(3)   | 0.22443(17)  | 0.021(1)       |
| C(3)   | 0.4313(3)    | 0.4473(3)   | 0.30841(17)  | 0.020(1)       |
| C(4)   | 0.5223(3)    | 0.2677(3)   | 0.12686(16)  | 0.020(1)       |
| C(5)   | 0.6396(3)    | 0.2684(3)   | 0.06194(17)  | 0.024(1)       |
| C(6)   | 0.6474(3)    | 0.2252(3)   | -0.01507(18) | 0.030(1)       |
| C(7)   | 0.5450(4)    | 0.1839(3)   | -0.02569(19) | 0.034(1)       |
| C(8)   | 0.4307(4)    | 0.1829(3)   | 0.04075(19)  | 0.031(1)       |
| C(9)   | 0.4167(3)    | 0.2250(3)   | 0.11909(17)  | 0.025(1)       |
| C(10)  | 0.7547(3)    | 0.3125(3)   | 0.07291(18)  | 0.029(1)       |
| C(11)  | 0.9025(4)    | 0.2039(4)   | 0.0565(3)    | 0.049(1)       |
| C(12)  | 0.7525(4)    | 0.4375(3)   | 0.0113(2)    | 0.038(1)       |
| C(13)  | 0.2908(3)    | 0.2230(3)   | 0.19184(18)  | 0.028(1)       |
| C(14)  | 0.1510(4)    | 0.3301(4)   | 0.1709(3)    | 0.053(1)       |
| C(15)  | 0.2780(5)    | 0.0888(4)   | 0.2111(3)    | 0.058(1)       |
| C(16)  | 0.5137(3)    | 0.2754(2)   | 0.43410(15)  | 0.015(1)       |
| C(17)  | 0.4044(3)    | 0.2368(3)   | 0.48747(16)  | 0.017(1)       |
| C(18)  | 0.4100(3)    | 0.2067(3)   | 0.57569(16)  | 0.019(1)       |
| C(19)  | 0.5197(3)    | 0.2122(3)   | 0.60757(16)  | 0.021(1)       |
| C(20)  | 0.6282(3)    | 0.2464(3)   | 0.55213(17)  | 0.021(1)       |
| C(21)  | 0.6277(3)    | 0.2799(3)   | 0.46338(16)  | 0.017(1)       |
| C(22)  | 0.2846(3)    | 0.2292(3)   | 0.45224(17)  | 0.021(1)       |
| C(23)  | 0.1473(3)    | 0.3494(3)   | 0.4694(2)    | 0.032(1)       |
| C(24)  | 0.2582(3)    | 0.1015(3)   | 0.48910(19)  | 0.025(1)       |
| C(25)  | 0.7476(3)    | 0.3168(3)   | 0.40290(17)  | 0.021(1)       |
| C(26)  | 0.8909(3)    | 0.2012(3)   | 0.4065(2)    | 0.035(1)       |
| C(27)  | 0.7544(3)    | 0.4389(3)   | 0.4271(2)    | 0.028(1)       |
| Sb(1)  | 0.09533(2)   | 0.79200(2)  | 0.26912(1)   | 0.019(1)       |
| F(1)   | -0.10206(17) | 0.82442(18) | 0.29669(11)  | 0.032(1)       |
| F(2)   | 0.29395(17)  | 0.75286(17) | 0.24144(11)  | 0.029(1)       |
| F(3)   | 0.12711(19)  | 0.66052(18) | 0.36407(11)  | 0.033(1)       |
| F(4)   | 0.1196(2)    | 0.6672(2)   | 0.19918(12)  | 0.038(1)       |
| F(5)   | 0.0687(2)    | 0.9219(2)   | 0.17394(12)  | 0.049(1)       |
| F(6)   | 0.0731(2)    | 0.91385(19) | 0.34027(13)  | 0.041(1)       |
| C(28)  | 0.8069(9)    | 0.6876(8)   | 0.1822(6)    | 0.045(2)       |
| C(28A) | 0.8176(8)    | 0.7023(8)   | 0.1417(6)    | 0.044(2)       |
| Cl(2)  | 0.71952(13)  | 0.86183(11) | 0.13248(7)   | 0.062(1)       |

|        |             |             |            |          |
|--------|-------------|-------------|------------|----------|
| Cl(3)  | 0.70250(14) | 0.60329(12) | 0.19787(7) | 0.064(1) |
| H(2A)  | 0.3915      | 0.5195      | 0.1844     | 0.025    |
| H(3A)  | 0.3887      | 0.5223      | 0.3384     | 0.023    |
| H(6A)  | 0.7251      | 0.2242      | -0.0611    | 0.036    |
| H(7A)  | 0.5524      | 0.1557      | -0.0790    | 0.040    |
| H(8A)  | 0.3614      | 0.1531      | 0.0326     | 0.037    |
| H(10A) | 0.7350      | 0.3318      | 0.1338     | 0.034    |
| H(11A) | 0.9031      | 0.1236      | 0.0959     | 0.073    |
| H(11B) | 0.9746      | 0.2324      | 0.0667     | 0.073    |
| H(11C) | 0.9247      | 0.1860      | -0.0036    | 0.073    |
| H(12A) | 0.6576      | 0.5067      | 0.0221     | 0.057    |
| H(12B) | 0.7739      | 0.4194      | -0.0487    | 0.057    |
| H(12C) | 0.8245      | 0.4666      | 0.0208     | 0.057    |
| H(13A) | 0.3093      | 0.2410      | 0.2453     | 0.034    |
| H(14A) | 0.0725      | 0.3257      | 0.2184     | 0.079    |
| H(14B) | 0.1324      | 0.3170      | 0.1171     | 0.079    |
| H(14C) | 0.1583      | 0.4166      | 0.1636     | 0.079    |
| H(15A) | 0.2048      | 0.0869      | 0.2627     | 0.087    |
| H(15B) | 0.3701      | 0.0207      | 0.2215     | 0.087    |
| H(15C) | 0.2507      | 0.0723      | 0.1616     | 0.087    |
| H(18A) | 0.3371      | 0.1819      | 0.6146     | 0.023    |
| H(19A) | 0.5206      | 0.1924      | 0.6681     | 0.025    |
| H(20A) | 0.7042      | 0.2471      | 0.5749     | 0.025    |
| H(22A) | 0.3147      | 0.2303      | 0.3880     | 0.025    |
| H(23A) | 0.1648      | 0.4296      | 0.4410     | 0.047    |
| H(23B) | 0.1174      | 0.3528      | 0.5319     | 0.047    |
| H(23C) | 0.0717      | 0.3428      | 0.4461     | 0.047    |
| H(24A) | 0.3493      | 0.0265      | 0.4830     | 0.037    |
| H(24B) | 0.1936      | 0.0926      | 0.4574     | 0.037    |
| H(24C) | 0.2148      | 0.1037      | 0.5505     | 0.037    |
| H(25A) | 0.7284      | 0.3368      | 0.3424     | 0.025    |
| H(26A) | 0.8845      | 0.1229      | 0.3924     | 0.053    |
| H(26B) | 0.9132      | 0.1831      | 0.4649     | 0.053    |
| H(26C) | 0.9666      | 0.2237      | 0.3646     | 0.053    |
| H(27A) | 0.6613      | 0.5112      | 0.4266     | 0.041    |
| H(27B) | 0.8277      | 0.4648      | 0.3850     | 0.041    |
| H(27C) | 0.7786      | 0.4190      | 0.4851     | 0.041    |
| H(28A) | 0.8975      | 0.6441      | 0.1437     | 0.054    |
| H(28B) | 0.8303      | 0.6880      | 0.2384     | 0.054    |
| H(28C) | 0.8933      | 0.6839      | 0.1753     | 0.053    |
| H(28D) | 0.8644      | 0.6757      | 0.0834     | 0.053    |

Table S3. Anisotropic displacement parameters ( $\text{\AA}^2$ ) for  $2\text{CrSbF}_6 \cdot \text{CH}_2\text{Cl}_2$ .

The anisotropic displacement factor exponent takes the form:

$$-2\pi^2[h^2 a^{*2}U_{11} + \dots + 2hka^*b^*U_{12}]$$

|       | $U_{11}$   | $U_{22}$   | $U_{33}$   | $U_{23}$    | $U_{13}$    | $U_{12}$    |
|-------|------------|------------|------------|-------------|-------------|-------------|
| Cl(1) | 0.0469(4)  | 0.0141(3)  | 0.0188(3)  | -0.0028(2)  | -0.0096(3)  | -0.0030(3)  |
| N(1)  | 0.0218(12) | 0.0179(11) | 0.0142(10) | -0.0013(8)  | -0.0039(8)  | -0.0076(10) |
| N(2)  | 0.0172(11) | 0.0153(10) | 0.0132(10) | -0.0019(8)  | -0.0030(8)  | -0.0064(9)  |
| C(1)  | 0.0189(13) | 0.0154(13) | 0.0146(12) | -0.0010(9)  | -0.0034(9)  | -0.0065(11) |
| C(2)  | 0.0223(14) | 0.0159(13) | 0.0203(13) | -0.0006(10) | -0.0048(10) | -0.0033(12) |
| C(3)  | 0.0209(14) | 0.0140(12) | 0.0200(13) | -0.0026(10) | -0.0039(10) | -0.0025(12) |
| C(4)  | 0.0285(15) | 0.0187(13) | 0.0119(12) | -0.0015(10) | -0.0059(10) | -0.0082(12) |
| C(5)  | 0.0293(16) | 0.0251(15) | 0.0164(13) | 0.0006(11)  | -0.0058(11) | -0.0093(13) |
| C(6)  | 0.0337(17) | 0.0360(17) | 0.0166(13) | -0.0045(12) | -0.0008(11) | -0.0101(15) |
| C(7)  | 0.048(2)   | 0.0397(18) | 0.0185(14) | -0.0090(13) | -0.0070(13) | -0.0177(17) |
| C(8)  | 0.0440(19) | 0.0366(18) | 0.0217(14) | -0.0039(12) | -0.0098(13) | -0.0215(16) |
| C(9)  | 0.0323(16) | 0.0271(15) | 0.0172(13) | 0.0003(11)  | -0.0069(11) | -0.0140(14) |
| C(10) | 0.0302(16) | 0.0375(18) | 0.0203(14) | -0.0028(12) | -0.0025(11) | -0.0164(15) |
| C(11) | 0.0277(19) | 0.046(2)   | 0.071(3)   | -0.0069(19) | -0.0171(17) | -0.0077(18) |
| C(12) | 0.053(2)   | 0.0406(19) | 0.0287(16) | -0.0009(14) | -0.0060(14) | -0.0274(18) |
| C(13) | 0.0340(17) | 0.0386(18) | 0.0199(14) | -0.0026(12) | -0.0041(12) | -0.0222(15) |
| C(14) | 0.038(2)   | 0.054(2)   | 0.053(2)   | 0.0040(19)  | 0.0056(17)  | -0.017(2)   |
| C(15) | 0.062(3)   | 0.038(2)   | 0.061(3)   | 0.0034(18)  | 0.015(2)    | -0.024(2)   |
| C(16) | 0.0190(13) | 0.0135(12) | 0.0124(11) | -0.0027(9)  | -0.0035(9)  | -0.0038(11) |
| C(17) | 0.0163(13) | 0.0141(12) | 0.0178(12) | -0.0030(10) | -0.0028(10) | -0.0023(11) |
| C(18) | 0.0210(14) | 0.0169(13) | 0.0169(12) | -0.0016(10) | -0.0007(10) | -0.0055(12) |
| C(19) | 0.0273(15) | 0.0188(13) | 0.0120(12) | -0.0030(10) | -0.0060(10) | -0.0030(12) |
| C(20) | 0.0217(14) | 0.0195(13) | 0.0210(13) | -0.0059(10) | -0.0068(10) | -0.0038(12) |
| C(21) | 0.0182(13) | 0.0148(12) | 0.0187(12) | -0.0060(10) | -0.0038(10) | -0.0039(11) |
| C(22) | 0.0208(14) | 0.0256(15) | 0.0181(12) | 0.0008(10)  | -0.0049(10) | -0.0120(13) |
| C(23) | 0.0225(15) | 0.0214(15) | 0.053(2)   | 0.0007(13)  | -0.0153(13) | -0.0079(13) |
| C(24) | 0.0228(15) | 0.0193(14) | 0.0333(15) | -0.0062(11) | -0.0072(12) | -0.0059(13) |
| C(25) | 0.0204(14) | 0.0255(15) | 0.0217(13) | -0.0038(11) | -0.0048(10) | -0.0115(13) |
| C(26) | 0.0182(15) | 0.0234(16) | 0.054(2)   | -0.0101(14) | 0.0112(13)  | -0.0053(14) |
| C(27) | 0.0263(16) | 0.0242(15) | 0.0341(16) | -0.0044(12) | -0.0048(12) | -0.0109(14) |
| Sb(1) | 0.0195(1)  | 0.0185(1)  | 0.0146(1)  | -0.0014(1)  | -0.0020(1)  | -0.0022(1)  |
| F(1)  | 0.0171(8)  | 0.0404(10) | 0.0300(9)  | -0.0084(8)  | -0.0022(7)  | -0.0023(8)  |
| F(2)  | 0.0195(8)  | 0.0328(10) | 0.0327(9)  | -0.0054(7)  | -0.0001(7)  | -0.0082(8)  |
| F(3)  | 0.0328(10) | 0.0307(10) | 0.0241(8)  | 0.0110(7)   | -0.0047(7)  | -0.0072(8)  |
| F(4)  | 0.0327(10) | 0.0483(12) | 0.0384(10) | -0.0281(9)  | -0.0047(8)  | -0.0088(9)  |
| F(5)  | 0.0474(12) | 0.0439(12) | 0.0312(10) | 0.0209(9)   | -0.0065(9)  | -0.0048(10) |
| F(6)  | 0.0423(12) | 0.0317(10) | 0.0503(12) | -0.0258(9)  | -0.0008(9)  | -0.0084(9)  |
| Cl(2) | 0.0749(7)  | 0.0539(6)  | 0.0727(7)  | -0.0243(5)  | -0.0362(6)  | -0.0178(6)  |
| Cl(3) | 0.0816(8)  | 0.0713(7)  | 0.0452(5)  | -0.0086(5)  | -0.0083(5)  | -0.0356(6)  |



Table S4. Bond lengths [Å] for  $2_{Cr}SbF_6 \cdot CH_2Cl_2$ .

| atom-atom     | distance   | atom-atom     | distance   |
|---------------|------------|---------------|------------|
| Cl(1)-C(1)    | 1.673(3)   | N(1)-C(1)     | 1.337(3)   |
| N(1)-C(2)     | 1.383(3)   | N(1)-C(4)     | 1.455(3)   |
| N(2)-C(1)     | 1.335(3)   | N(2)-C(3)     | 1.386(3)   |
| N(2)-C(16)    | 1.458(3)   | C(2)-C(3)     | 1.347(4)   |
| C(4)-C(5)     | 1.397(4)   | C(4)-C(9)     | 1.398(4)   |
| C(5)-C(6)     | 1.394(4)   | C(5)-C(10)    | 1.520(4)   |
| C(6)-C(7)     | 1.373(5)   | C(7)-C(8)     | 1.389(4)   |
| C(8)-C(9)     | 1.390(4)   | C(9)-C(13)    | 1.529(4)   |
| C(10)-C(12)   | 1.526(4)   | C(10)-C(11)   | 1.530(5)   |
| C(13)-C(15)   | 1.518(5)   | C(13)-C(14)   | 1.524(5)   |
| C(16)-C(21)   | 1.397(4)   | C(16)-C(17)   | 1.402(4)   |
| C(17)-C(18)   | 1.394(4)   | C(17)-C(22)   | 1.523(3)   |
| C(18)-C(19)   | 1.384(4)   | C(19)-C(20)   | 1.384(4)   |
| C(20)-C(21)   | 1.394(4)   | C(21)-C(25)   | 1.520(4)   |
| C(22)-C(24)   | 1.528(4)   | C(22)-C(23)   | 1.530(4)   |
| C(25)-C(27)   | 1.529(4)   | C(25)-C(26)   | 1.533(4)   |
| Sb(1)-F(5)    | 1.8590(18) | Sb(1)-F(3)    | 1.8689(16) |
| Sb(1)-F(6)    | 1.8701(17) | Sb(1)-F(4)    | 1.8757(17) |
| Sb(1)-F(2)    | 1.8830(16) | Sb(1)-F(1)    | 1.8840(16) |
| C(28)-Cl(3)   | 1.646(8)   | C(28)-Cl(2)   | 1.878(8)   |
| C(28A)-Cl(2)  | 1.656(8)   | C(28A)-Cl(3)  | 1.890(8)   |
| C(2)-H(2A)    | 0.9500     | C(3)-H(3A)    | 0.9500     |
| C(6)-H(6A)    | 0.9500     | C(7)-H(7A)    | 0.9500     |
| C(8)-H(8A)    | 0.9500     | C(10)-H(10A)  | 1.0000     |
| C(11)-H(11A)  | 0.9800     | C(11)-H(11B)  | 0.9800     |
| C(11)-H(11C)  | 0.9800     | C(12)-H(12A)  | 0.9800     |
| C(12)-H(12B)  | 0.9800     | C(12)-H(12C)  | 0.9800     |
| C(13)-H(13A)  | 1.0000     | C(14)-H(14A)  | 0.9800     |
| C(14)-H(14B)  | 0.9800     | C(14)-H(14C)  | 0.9800     |
| C(15)-H(15A)  | 0.9800     | C(15)-H(15B)  | 0.9800     |
| C(15)-H(15C)  | 0.9800     | C(18)-H(18A)  | 0.9500     |
| C(19)-H(19A)  | 0.9500     | C(20)-H(20A)  | 0.9500     |
| C(22)-H(22A)  | 1.0000     | C(23)-H(23A)  | 0.9800     |
| C(23)-H(23B)  | 0.9800     | C(23)-H(23C)  | 0.9800     |
| C(24)-H(24A)  | 0.9800     | C(24)-H(24B)  | 0.9800     |
| C(24)-H(24C)  | 0.9800     | C(25)-H(25A)  | 1.0000     |
| C(26)-H(26A)  | 0.9800     | C(26)-H(26B)  | 0.9800     |
| C(26)-H(26C)  | 0.9800     | C(27)-H(27A)  | 0.9800     |
| C(27)-H(27B)  | 0.9800     | C(27)-H(27C)  | 0.9800     |
| C(28)-H(28A)  | 0.9900     | C(28)-H(28B)  | 0.9900     |
| C(28A)-H(28C) | 0.9900     | C(28A)-H(28D) | 0.9900     |

Table S5. Bond angles [°] for **2**<sub>Cl</sub>·SbF<sub>6</sub>·CH<sub>2</sub>Cl<sub>2</sub>.

| atom-atom-atom     | angle     | atom-atom-atom      | angle     |
|--------------------|-----------|---------------------|-----------|
| C(1)-N(1)-C(2)     | 108.0(2)  | C(1)-N(1)-C(4)      | 125.4(2)  |
| C(2)-N(1)-C(4)     | 126.3(2)  | C(1)-N(2)-C(3)      | 108.1(2)  |
| C(1)-N(2)-C(16)    | 126.6(2)  | C(3)-N(2)-C(16)     | 125.0(2)  |
| N(2)-C(1)-N(1)     | 109.0(2)  | N(2)-C(1)-Cl(1)     | 125.6(2)  |
| N(1)-C(1)-Cl(1)    | 125.3(2)  | C(3)-C(2)-N(1)      | 107.5(2)  |
| C(2)-C(3)-N(2)     | 107.3(2)  | C(5)-C(4)-C(9)      | 124.1(2)  |
| C(5)-C(4)-N(1)     | 118.5(2)  | C(9)-C(4)-N(1)      | 117.4(2)  |
| C(6)-C(5)-C(4)     | 116.4(3)  | C(6)-C(5)-C(10)     | 120.6(3)  |
| C(4)-C(5)-C(10)    | 123.0(2)  | C(7)-C(6)-C(5)      | 121.3(3)  |
| C(6)-C(7)-C(8)     | 120.7(3)  | C(7)-C(8)-C(9)      | 120.7(3)  |
| C(8)-C(9)-C(4)     | 116.7(3)  | C(8)-C(9)-C(13)     | 120.2(3)  |
| C(4)-C(9)-C(13)    | 123.0(2)  | C(5)-C(10)-C(12)    | 110.5(3)  |
| C(5)-C(10)-C(11)   | 110.7(3)  | C(12)-C(10)-C(11)   | 109.8(3)  |
| C(15)-C(13)-C(14)  | 110.5(3)  | C(15)-C(13)-C(9)    | 111.3(3)  |
| C(14)-C(13)-C(9)   | 111.5(3)  | C(21)-C(16)-C(17)   | 124.3(2)  |
| C(21)-C(16)-N(2)   | 118.3(2)  | C(17)-C(16)-N(2)    | 117.3(2)  |
| C(18)-C(17)-C(16)  | 116.3(2)  | C(18)-C(17)-C(22)   | 121.2(2)  |
| C(16)-C(17)-C(22)  | 122.5(2)  | C(19)-C(18)-C(17)   | 121.2(2)  |
| C(18)-C(19)-C(20)  | 120.6(2)  | C(19)-C(20)-C(21)   | 121.1(2)  |
| C(20)-C(21)-C(16)  | 116.5(2)  | C(20)-C(21)-C(25)   | 120.7(2)  |
| C(16)-C(21)-C(25)  | 122.8(2)  | C(17)-C(22)-C(24)   | 111.9(2)  |
| C(17)-C(22)-C(23)  | 110.7(2)  | C(24)-C(22)-C(23)   | 111.0(2)  |
| C(21)-C(25)-C(27)  | 110.7(2)  | C(21)-C(25)-C(26)   | 110.0(2)  |
| C(27)-C(25)-C(26)  | 110.2(2)  | F(5)-Sb(1)-F(3)     | 178.53(8) |
| F(5)-Sb(1)-F(6)    | 91.13(10) | F(3)-Sb(1)-F(6)     | 88.87(9)  |
| F(5)-Sb(1)-F(4)    | 89.85(10) | F(3)-Sb(1)-F(4)     | 90.13(9)  |
| F(6)-Sb(1)-F(4)    | 178.91(9) | F(5)-Sb(1)-F(2)     | 90.15(9)  |
| F(3)-Sb(1)-F(2)    | 88.38(8)  | F(6)-Sb(1)-F(2)     | 90.78(8)  |
| F(4)-Sb(1)-F(2)    | 88.76(8)  | F(5)-Sb(1)-F(1)     | 91.08(9)  |
| F(3)-Sb(1)-F(1)    | 90.39(8)  | F(6)-Sb(1)-F(1)     | 90.98(8)  |
| F(4)-Sb(1)-F(1)    | 89.45(8)  | F(2)-Sb(1)-F(1)     | 177.83(8) |
| Cl(3)-C(28)-Cl(2)  | 111.6(4)  | Cl(2)-C(28A)-Cl(3)  | 110.6(4)  |
| C(28A)-Cl(2)-C(28) | 19.2(3)   | C(28)-Cl(3)-C(28A)  | 18.9(3)   |
| C(3)-C(2)-H(2A)    | 126.2     | N(1)-C(2)-H(2A)     | 126.2     |
| C(2)-C(3)-H(3A)    | 126.4     | N(2)-C(3)-H(3A)     | 126.4     |
| C(7)-C(6)-H(6A)    | 119.3     | C(5)-C(6)-H(6A)     | 119.3     |
| C(6)-C(7)-H(7A)    | 119.6     | C(8)-C(7)-H(7A)     | 119.6     |
| C(7)-C(8)-H(8A)    | 119.6     | C(9)-C(8)-H(8A)     | 119.6     |
| C(5)-C(10)-H(10A)  | 108.6     | C(12)-C(10)-H(10A)  | 108.6     |
| C(11)-C(10)-H(10A) | 108.6     | C(10)-C(11)-H(11A)  | 109.5     |
| C(10)-C(11)-H(11B) | 109.5     | H(11A)-C(11)-H(11B) | 109.5     |
| C(10)-C(11)-H(11C) | 109.5     | H(11A)-C(11)-H(11C) | 109.5     |

|                     |       |                      |       |
|---------------------|-------|----------------------|-------|
| H(11B)-C(11)-H(11C) | 109.5 | C(10)-C(12)-H(12A)   | 109.5 |
| C(10)-C(12)-H(12B)  | 109.5 | H(12A)-C(12)-H(12B)  | 109.5 |
| C(10)-C(12)-H(12C)  | 109.5 | H(12A)-C(12)-H(12C)  | 109.5 |
| H(12B)-C(12)-H(12C) | 109.5 | C(15)-C(13)-H(13A)   | 107.8 |
| C(14)-C(13)-H(13A)  | 107.8 | C(9)-C(13)-H(13A)    | 107.8 |
| C(13)-C(14)-H(14A)  | 109.5 | C(13)-C(14)-H(14B)   | 109.5 |
| H(14A)-C(14)-H(14B) | 109.5 | C(13)-C(14)-H(14C)   | 109.5 |
| H(14A)-C(14)-H(14C) | 109.5 | H(14B)-C(14)-H(14C)  | 109.5 |
| C(13)-C(15)-H(15A)  | 109.5 | C(13)-C(15)-H(15B)   | 109.5 |
| H(15A)-C(15)-H(15B) | 109.5 | C(13)-C(15)-H(15C)   | 109.5 |
| H(15A)-C(15)-H(15C) | 109.5 | H(15B)-C(15)-H(15C)  | 109.5 |
| C(19)-C(18)-H(18A)  | 119.4 | C(17)-C(18)-H(18A)   | 119.4 |
| C(18)-C(19)-H(19A)  | 119.7 | C(20)-C(19)-H(19A)   | 119.7 |
| C(19)-C(20)-H(20A)  | 119.5 | C(21)-C(20)-H(20A)   | 119.5 |
| C(17)-C(22)-H(22A)  | 107.7 | C(24)-C(22)-H(22A)   | 107.7 |
| C(23)-C(22)-H(22A)  | 107.7 | C(22)-C(23)-H(23A)   | 109.5 |
| C(22)-C(23)-H(23B)  | 109.5 | H(23A)-C(23)-H(23B)  | 109.5 |
| C(22)-C(23)-H(23C)  | 109.5 | H(23A)-C(23)-H(23C)  | 109.5 |
| H(23B)-C(23)-H(23C) | 109.5 | C(22)-C(24)-H(24A)   | 109.5 |
| C(22)-C(24)-H(24B)  | 109.5 | H(24A)-C(24)-H(24B)  | 109.5 |
| C(22)-C(24)-H(24C)  | 109.5 | H(24A)-C(24)-H(24C)  | 109.5 |
| H(24B)-C(24)-H(24C) | 109.5 | C(21)-C(25)-H(25A)   | 108.6 |
| C(27)-C(25)-H(25A)  | 108.6 | C(26)-C(25)-H(25A)   | 108.6 |
| C(25)-C(26)-H(26A)  | 109.5 | C(25)-C(26)-H(26B)   | 109.5 |
| H(26A)-C(26)-H(26B) | 109.5 | C(25)-C(26)-H(26C)   | 109.5 |
| H(26A)-C(26)-H(26C) | 109.5 | H(26B)-C(26)-H(26C)  | 109.5 |
| C(25)-C(27)-H(27A)  | 109.5 | C(25)-C(27)-H(27B)   | 109.5 |
| H(27A)-C(27)-H(27B) | 109.5 | C(25)-C(27)-H(27C)   | 109.5 |
| H(27A)-C(27)-H(27C) | 109.5 | H(27B)-C(27)-H(27C)  | 109.5 |
| Cl(3)-C(28)-H(28A)  | 109.3 | Cl(2)-C(28)-H(28A)   | 109.3 |
| Cl(3)-C(28)-H(28B)  | 109.3 | Cl(2)-C(28)-H(28B)   | 109.3 |
| H(28A)-C(28)-H(28B) | 108.0 | Cl(2)-C(28A)-H(28C)  | 109.5 |
| Cl(3)-C(28A)-H(28C) | 109.5 | Cl(2)-C(28A)-H(28D)  | 109.5 |
| Cl(3)-C(28A)-H(28D) | 109.5 | H(28C)-C(28A)-H(28D) | 108.1 |

Table S6. Torsion angles [°] for **2**<sub>Cl</sub>·SbF<sub>6</sub>·CH<sub>2</sub>Cl<sub>2</sub>.

| atom-atom-atom-atom | angle                 | atom-atom-atom-atom  | angle     |
|---------------------|-----------------------|----------------------|-----------|
| C(3)-N(2)-C(1)-N(1) | -1.1(3)               | C(16)-N(2)-C(1)-N(1) | 173.3(2)  |
|                     | C(3)-N(2)-C(1)-Cl(1)  |                      | 177.2(2)  |
|                     | C(16)-N(2)-C(1)-Cl(1) |                      | -8.4(4)   |
|                     | C(2)-N(1)-C(1)-N(2)   |                      | 1.0(3)    |
|                     | C(4)-N(1)-C(1)-N(2)   |                      | -173.4(2) |
|                     | C(2)-N(1)-C(1)-Cl(1)  |                      | -177.3(2) |
|                     | C(4)-N(1)-C(1)-Cl(1)  |                      | 8.3(4)    |
|                     | C(1)-N(1)-C(2)-C(3)   |                      | -0.5(3)   |
|                     | C(4)-N(1)-C(2)-C(3)   |                      | 173.8(2)  |
|                     | N(1)-C(2)-C(3)-N(2)   |                      | -0.2(3)   |
|                     | C(1)-N(2)-C(3)-C(2)   |                      | 0.8(3)    |
|                     | C(16)-N(2)-C(3)-C(2)  |                      | -173.7(2) |
|                     | C(1)-N(1)-C(4)-C(5)   |                      | -96.6(3)  |
|                     | C(2)-N(1)-C(4)-C(5)   |                      | 90.0(3)   |
|                     | C(1)-N(1)-C(4)-C(9)   |                      | 84.7(3)   |
|                     | C(2)-N(1)-C(4)-C(9)   |                      | -88.6(3)  |
|                     | C(9)-C(4)-C(5)-C(6)   |                      | 1.0(4)    |
|                     | N(1)-C(4)-C(5)-C(6)   |                      | -177.5(3) |
|                     | C(9)-C(4)-C(5)-C(10)  |                      | -178.6(3) |
|                     | N(1)-C(4)-C(5)-C(10)  |                      | 2.9(4)    |
|                     | C(4)-C(5)-C(6)-C(7)   |                      | -0.2(5)   |
|                     | C(10)-C(5)-C(6)-C(7)  |                      | 179.4(3)  |
|                     | C(5)-C(6)-C(7)-C(8)   |                      | -0.6(5)   |
|                     | C(6)-C(7)-C(8)-C(9)   |                      | 0.7(5)    |
|                     | C(7)-C(8)-C(9)-C(4)   |                      | 0.0(5)    |
|                     | C(7)-C(8)-C(9)-C(13)  |                      | -179.8(3) |
|                     | C(5)-C(4)-C(9)-C(8)   |                      | -0.9(4)   |
|                     | N(1)-C(4)-C(9)-C(8)   |                      | 177.6(3)  |
|                     | C(5)-C(4)-C(9)-C(13)  |                      | 178.9(3)  |
|                     | N(1)-C(4)-C(9)-C(13)  |                      | -2.6(4)   |
|                     | C(6)-C(5)-C(10)-C(12) |                      | 66.1(4)   |
|                     | C(4)-C(5)-C(10)-C(12) |                      | -114.3(3) |
|                     | C(6)-C(5)-C(10)-C(11) |                      | -55.8(4)  |
|                     | C(4)-C(5)-C(10)-C(11) |                      | 123.8(3)  |
|                     | C(8)-C(9)-C(13)-C(15) |                      | 52.0(4)   |
|                     | C(4)-C(9)-C(13)-C(15) |                      | -127.8(3) |
|                     | C(8)-C(9)-C(13)-C(14) |                      | -72.0(4)  |
|                     | C(4)-C(9)-C(13)-C(14) |                      | 108.2(3)  |
|                     | C(1)-N(2)-C(16)-C(21) |                      | 97.1(3)   |
|                     | C(3)-N(2)-C(16)-C(21) |                      | -89.4(3)  |
|                     | C(1)-N(2)-C(16)-C(17) |                      | -85.6(3)  |
|                     | C(3)-N(2)-C(16)-C(17) |                      | 87.9(3)   |

|                          |           |
|--------------------------|-----------|
| C(21)-C(16)-C(17)-C(18)  | 2.6(4)    |
| N(2)-C(16)-C(17)-C(18)   | -174.4(2) |
| C(21)-C(16)-C(17)-C(22)  | -178.0(2) |
| N(2)-C(16)-C(17)-C(22)   | 4.9(4)    |
| C(16)-C(17)-C(18)-C(19)  | -1.3(4)   |
| C(22)-C(17)-C(18)-C(19)  | 179.3(3)  |
| C(17)-C(18)-C(19)-C(20)  | -0.8(4)   |
| C(18)-C(19)-C(20)-C(21)  | 1.9(4)    |
| C(19)-C(20)-C(21)-C(16)  | -0.7(4)   |
| C(19)-C(20)-C(21)-C(25)  | -179.8(3) |
| C(17)-C(16)-C(21)-C(20)  | -1.6(4)   |
| N(2)-C(16)-C(21)-C(20)   | 175.4(2)  |
| C(17)-C(16)-C(21)-C(25)  | 177.4(2)  |
| N(2)-C(16)-C(21)-C(25)   | -5.6(4)   |
| C(18)-C(17)-C(22)-C(24)  | -46.8(3)  |
| C(16)-C(17)-C(22)-C(24)  | 133.9(3)  |
| C(18)-C(17)-C(22)-C(23)  | 77.6(3)   |
| C(16)-C(17)-C(22)-C(23)  | -101.7(3) |
| C(20)-C(21)-C(25)-C(27)  | -61.1(3)  |
| C(16)-C(21)-C(25)-C(27)  | 119.9(3)  |
| C(20)-C(21)-C(25)-C(26)  | 60.9(3)   |
| C(16)-C(21)-C(25)-C(26)  | -118.1(3) |
| Cl(3)-C(28A)-Cl(2)-C(28) | 59.8(11)  |
| Cl(3)-C(28)-Cl(2)-C(28A) | -92.9(13) |
| Cl(2)-C(28)-Cl(3)-C(28A) | 62.6(12)  |
| Cl(2)-C(28A)-Cl(3)-C(28) | -90.0(13) |

Figure S2. Crystal structure for  $2_{\text{Br}} \cdot \text{CF}_3\text{SO}_3 \cdot \text{CH}_2\text{Cl}_2$ .

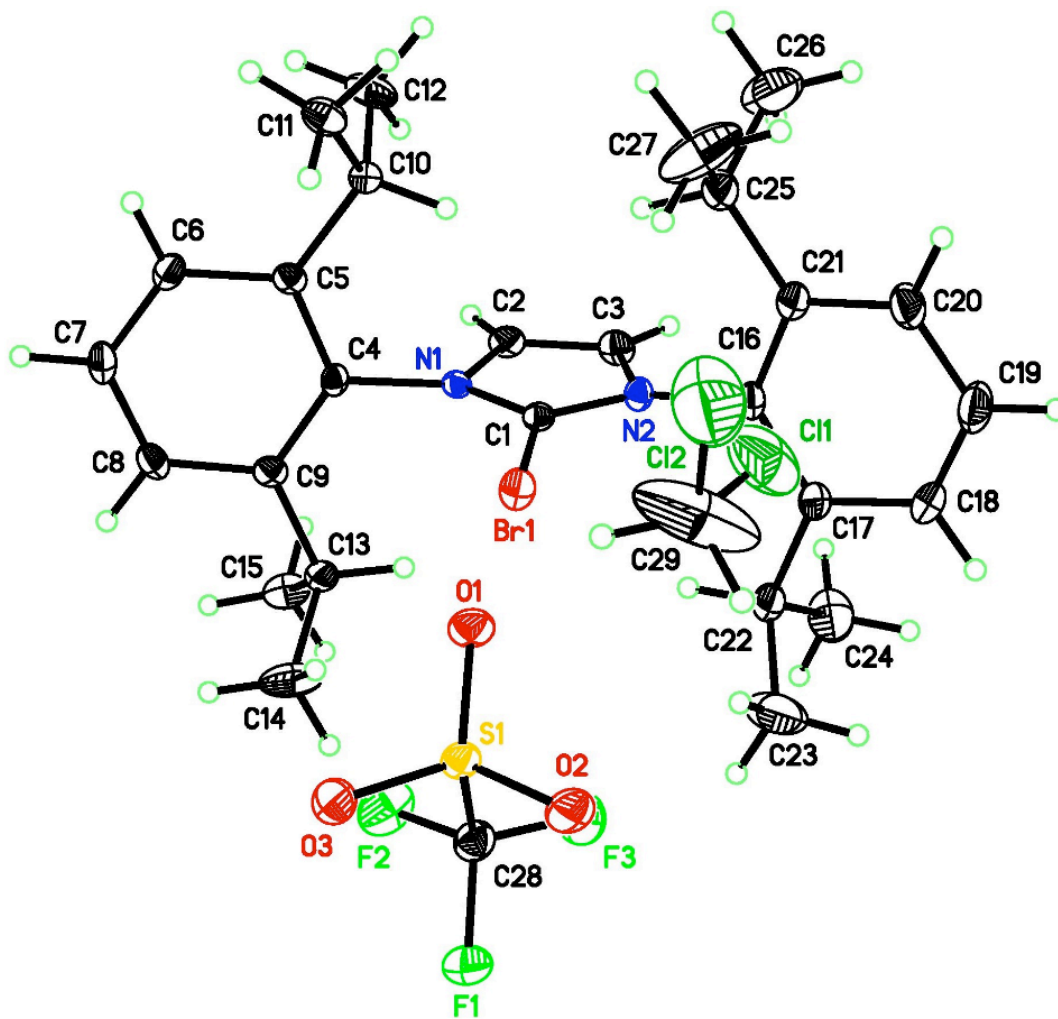

Table S7. Crystal data and structure refinement for  $2_{\text{Br}}\cdot\text{CF}_3\text{SO}_3\cdot\text{CH}_2\text{Cl}_2$ .

|                                        |                                                                                                                                                      |
|----------------------------------------|------------------------------------------------------------------------------------------------------------------------------------------------------|
| Empirical formula                      | $\text{C}_{29}\text{H}_{38}\text{BrCl}_2\text{F}_3\text{N}_2\text{O}_3\text{S}$                                                                      |
| Formula weight                         | 702.48                                                                                                                                               |
| Temperature                            | 100(2) K                                                                                                                                             |
| Wavelength                             | 0.71073 Å                                                                                                                                            |
| Crystal system                         | triclinic                                                                                                                                            |
| Space group                            | P-1                                                                                                                                                  |
| Unit cell dimensions                   | $a = 10.3704(3)$ Å $\alpha = 89.1950(10)^\circ$<br>$b = 11.6440(3)$ Å $\beta = 75.2830(10)^\circ$<br>$c = 16.0199(4)$ Å $\gamma = 63.5760(10)^\circ$ |
| Volume                                 | $1664.53(8)$ Å <sup>3</sup>                                                                                                                          |
| Z                                      | 2                                                                                                                                                    |
| Density (calculated)                   | $1.402$ g.cm <sup>-3</sup>                                                                                                                           |
| Absorption coefficient ( $\mu$ )       | $1.506$ mm <sup>-1</sup>                                                                                                                             |
| F(000)                                 | 724                                                                                                                                                  |
| Crystal size                           | $0.34 \times 0.16 \times 0.15$ mm <sup>3</sup>                                                                                                       |
| $\theta$ range for data collection     | 1.97 to 26.42°                                                                                                                                       |
| Index ranges                           | $-12 \leq h \leq 12$ , $-14 \leq k \leq 14$ , $-19 \leq l \leq 20$                                                                                   |
| Reflections collected                  | 24895                                                                                                                                                |
| Independent reflections                | 6786 [ $R_{\text{int}} = 0.0311$ ]                                                                                                                   |
| Completeness to $\theta = 26.42^\circ$ | 99.3 %                                                                                                                                               |
| Absorption correction                  | numerical                                                                                                                                            |
| Max. and min. transmission             | 0.8056 and 0.6284                                                                                                                                    |
| Refinement method                      | Full-matrix least-squares on $F^2$                                                                                                                   |
| Data / restraints / parameters         | 6786 / 0 / 378                                                                                                                                       |
| Goodness-of-fit on $F^2$               | 1.059                                                                                                                                                |
| Final R indices [ $I > 2\sigma(I)$ ]   | $R_1 = 0.0384$ , $wR_2 = 0.0908$                                                                                                                     |
| R indices (all data)                   | $R_1 = 0.0466$ , $wR_2 = 0.0953$                                                                                                                     |
| Largest diff. peak and hole            | 1.299 and $-0.911$ e <sup>-</sup> .Å <sup>-3</sup>                                                                                                   |

Table S8. Atomic coordinates and equivalent isotropic displacement parameters ( $\text{\AA}^2$ ) for  $2_{\text{Br}}\cdot\text{CF}_3\text{SO}_3\cdot\text{CH}_2\text{Cl}_2$ .  $U(\text{eq})$  is defined as one third of the trace of the orthogonalized  $U_{ij}$  tensor.

|       | x          | y           | z            | $U(\text{eq})$ |
|-------|------------|-------------|--------------|----------------|
| Br(1) | 0.76760(3) | 0.42414(2)  | 0.28360(2)   | 0.018(1)       |
| N(1)  | 0.8297(2)  | 0.17943(18) | 0.34299(12)  | 0.011(1)       |
| N(2)  | 0.8356(2)  | 0.17925(19) | 0.20647(12)  | 0.014(1)       |
| C(1)  | 0.8116(3)  | 0.2527(2)   | 0.27782(15)  | 0.012(1)       |
| C(2)  | 0.8671(3)  | 0.0545(2)   | 0.31185(16)  | 0.016(1)       |
| C(3)  | 0.8710(3)  | 0.0546(2)   | 0.22737(16)  | 0.017(1)       |
| C(4)  | 0.7964(3)  | 0.2233(2)   | 0.43448(14)  | 0.013(1)       |
| C(5)  | 0.6499(3)  | 0.2616(2)   | 0.48600(15)  | 0.014(1)       |
| C(6)  | 0.6226(3)  | 0.2937(2)   | 0.57487(15)  | 0.017(1)       |
| C(7)  | 0.7357(3)  | 0.2883(2)   | 0.60820(16)  | 0.018(1)       |
| C(8)  | 0.8786(3)  | 0.2528(2)   | 0.55431(16)  | 0.017(1)       |
| C(9)  | 0.9125(3)  | 0.2189(2)   | 0.46533(15)  | 0.015(1)       |
| C(10) | 0.5260(3)  | 0.2675(2)   | 0.44921(16)  | 0.016(1)       |
| C(11) | 0.3771(3)  | 0.3887(2)   | 0.48708(17)  | 0.020(1)       |
| C(12) | 0.5056(3)  | 0.1452(3)   | 0.4632(2)    | 0.025(1)       |
| C(13) | 1.0685(3)  | 0.1807(3)   | 0.40706(16)  | 0.019(1)       |
| C(14) | 1.1073(3)  | 0.2929(3)   | 0.4092(2)    | 0.034(1)       |
| C(15) | 1.1855(3)  | 0.0596(3)   | 0.43214(19)  | 0.026(1)       |
| C(16) | 0.8055(3)  | 0.2258(2)   | 0.12542(15)  | 0.015(1)       |
| C(17) | 0.9216(3)  | 0.2270(2)   | 0.05918(16)  | 0.019(1)       |
| C(18) | 0.8878(3)  | 0.2685(3)   | -0.01842(17) | 0.026(1)       |
| C(19) | 0.7458(3)  | 0.3075(3)   | -0.02729(18) | 0.030(1)       |
| C(20) | 0.6333(3)  | 0.3057(3)   | 0.04044(17)  | 0.027(1)       |
| C(21) | 0.6602(3)  | 0.2640(3)   | 0.11876(16)  | 0.019(1)       |
| C(22) | 1.0778(3)  | 0.1858(3)   | 0.06793(17)  | 0.023(1)       |
| C(23) | 1.1245(4)  | 0.2936(4)   | 0.0478(2)    | 0.046(1)       |
| C(24) | 1.1905(3)  | 0.0617(3)   | 0.0085(2)    | 0.036(1)       |
| C(25) | 0.5353(3)  | 0.2625(3)   | 0.19260(17)  | 0.023(1)       |
| C(26) | 0.4865(4)  | 0.1635(4)   | 0.1699(2)    | 0.051(1)       |
| C(27) | 0.4049(4)  | 0.3955(3)   | 0.2195(3)    | 0.055(1)       |



|        |             |             |             |          |
|--------|-------------|-------------|-------------|----------|
| S(1)   | 0.80545(7)  | 0.75568(6)  | 0.28162(4)  | 0.016(1) |
| F(1)   | 1.09282(18) | 0.68670(16) | 0.23778(10) | 0.028(1) |
| F(2)   | 1.02907(19) | 0.56084(16) | 0.31868(11) | 0.034(1) |
| F(3)   | 1.03590(19) | 0.55346(16) | 0.18316(11) | 0.035(1) |
| O(1)   | 0.7218(2)   | 0.68224(17) | 0.29617(11) | 0.021(1) |
| O(2)   | 0.7966(2)   | 0.82349(18) | 0.20531(12) | 0.024(1) |
| O(3)   | 0.7941(2)   | 0.82738(18) | 0.35812(12) | 0.025(1) |
| C(28)  | 1.0000(3)   | 0.6325(3)   | 0.25390(17) | 0.021(1) |
| Cl(1)  | 0.55898(12) | 0.64591(10) | 0.13399(7)  | 0.058(1) |
| Cl(2)  | 0.30823(14) | 0.90359(12) | 0.19508(7)  | 0.070(1) |
| C(29)  | 0.4976(6)   | 0.8056(4)   | 0.1769(5)   | 0.095(2) |
| H(2A)  | 0.8863      | -0.0174     | 0.3443      | 0.019    |
| H(3A)  | 0.8939      | -0.0174     | 0.1890      | 0.021    |
| H(6A)  | 0.5252      | 0.3194      | 0.6128      | 0.020    |
| H(7A)  | 0.7153      | 0.3093      | 0.6688      | 0.022    |
| H(8A)  | 0.9541      | 0.2516      | 0.5782      | 0.021    |
| H(10A) | 0.5577      | 0.2704      | 0.3851      | 0.020    |
| H(11A) | 0.3948      | 0.4648      | 0.4848      | 0.031    |
| H(11B) | 0.3340      | 0.3810      | 0.5476      | 0.031    |
| H(11C) | 0.3074      | 0.3979      | 0.4531      | 0.031    |
| H(12A) | 0.6003      | 0.0691      | 0.4357      | 0.038    |
| H(12B) | 0.4279      | 0.1493      | 0.4373      | 0.038    |
| H(12C) | 0.4756      | 0.1393      | 0.5256      | 0.038    |
| H(13A) | 1.0695      | 0.1615      | 0.3462      | 0.022    |
| H(14A) | 1.0308      | 0.3696      | 0.3933      | 0.051    |
| H(14B) | 1.2052      | 0.2695      | 0.3680      | 0.051    |
| H(14C) | 1.1108      | 0.3113      | 0.4679      | 0.051    |
| H(15A) | 1.1562      | -0.0097     | 0.4330      | 0.039    |
| H(15B) | 1.1922      | 0.0783      | 0.4899      | 0.039    |
| H(15C) | 1.2832      | 0.0326      | 0.3896      | 0.039    |
| H(18A) | 0.9637      | 0.2699      | -0.0658     | 0.031    |
| H(19A) | 0.7251      | 0.3359      | -0.0804     | 0.036    |
| H(20A) | 0.5361      | 0.3335      | 0.0332      | 0.032    |
| H(22A) | 1.0769      | 0.1685      | 0.1293      | 0.028    |
| H(23A) | 1.0466      | 0.3744      | 0.0828      | 0.068    |
| H(23B) | 1.1375      | 0.3049      | -0.0140     | 0.068    |

|        |        |         |         |       |
|--------|--------|---------|---------|-------|
| H(23C) | 1.2191 | 0.2701  | 0.0618  | 0.068 |
| H(24A) | 1.1600 | -0.0063 | 0.0228  | 0.054 |
| H(24B) | 1.2900 | 0.0348  | 0.0167  | 0.054 |
| H(24C) | 1.1938 | 0.0770  | -0.0521 | 0.054 |
| H(25A) | 0.5765 | 0.2355  | 0.2436  | 0.027 |
| H(26A) | 0.4069 | 0.1647  | 0.2190  | 0.077 |
| H(26B) | 0.5723 | 0.0773  | 0.1577  | 0.077 |
| H(26C) | 0.4491 | 0.1852  | 0.1186  | 0.077 |
| H(27A) | 0.4399 | 0.4556  | 0.2350  | 0.082 |
| H(27B) | 0.3296 | 0.3929  | 0.2698  | 0.082 |
| H(27C) | 0.3603 | 0.4244  | 0.1712  | 0.082 |
| H(29A) | 0.5234 | 0.8039  | 0.2325  | 0.114 |
| H(29B) | 0.5529 | 0.8439  | 0.1363  | 0.114 |

Table S9. Anisotropic displacement parameters ( $\text{\AA}^2$ ) for  $2_{\text{Br}}\cdot\text{CF}_3\text{SO}_3\cdot\text{CH}_2\text{Cl}_2$ .

The anisotropic displacement factor exponent takes the form:

$$-2\pi^2[h^2 a^{*2}U_{11} + \dots + 2hka^*b^*U_{12}]$$

|       | $U_{11}$   | $U_{22}$   | $U_{33}$   | $U_{23}$    | $U_{13}$    | $U_{12}$    |
|-------|------------|------------|------------|-------------|-------------|-------------|
| Br(1) | 0.0249(2)  | 0.0132(1)  | 0.0161(1)  | 0.0021(1)   | -0.0050(1)  | -0.0088(1)  |
| N(1)  | 0.0125(10) | 0.0114(10) | 0.0121(9)  | 0.0018(7)   | -0.0038(8)  | -0.0069(8)  |
| N(2)  | 0.0169(10) | 0.0123(10) | 0.0113(9)  | 0.0006(8)   | -0.0034(8)  | -0.0068(8)  |
| C(1)  | 0.0109(11) | 0.0114(11) | 0.0134(11) | 0.0010(9)   | -0.0027(9)  | -0.0049(9)  |
| C(2)  | 0.0200(13) | 0.0111(12) | 0.0198(12) | 0.0031(9)   | -0.0047(10) | -0.0099(10) |
| C(3)  | 0.0203(13) | 0.0126(12) | 0.0202(13) | 0.0000(10)  | -0.0053(10) | -0.0082(10) |
| C(4)  | 0.0189(12) | 0.0121(11) | 0.0101(11) | 0.0037(9)   | -0.0047(9)  | -0.0089(10) |
| C(5)  | 0.0169(12) | 0.0117(11) | 0.0163(12) | 0.0041(9)   | -0.0060(10) | -0.0088(10) |
| C(6)  | 0.0199(13) | 0.0164(12) | 0.0131(11) | 0.0013(9)   | -0.0014(10) | -0.0092(10) |
| C(7)  | 0.0276(14) | 0.0166(12) | 0.0118(11) | 0.0013(9)   | -0.0065(10) | -0.0106(11) |
| C(8)  | 0.0232(13) | 0.0176(13) | 0.0172(12) | 0.0052(10)  | -0.0111(10) | -0.0119(11) |
| C(9)  | 0.0186(13) | 0.0126(12) | 0.0172(12) | 0.0060(9)   | -0.0067(10) | -0.0099(10) |
| C(10) | 0.0160(12) | 0.0206(13) | 0.0148(12) | 0.0015(10)  | -0.0037(10) | -0.0104(11) |
| C(11) | 0.0195(13) | 0.0171(13) | 0.0275(14) | 0.0046(10)  | -0.0107(11) | -0.0088(11) |
| C(12) | 0.0192(14) | 0.0173(13) | 0.0423(17) | -0.0022(12) | -0.0102(12) | -0.0097(11) |
| C(13) | 0.0179(13) | 0.0272(14) | 0.0162(12) | 0.0067(10)  | -0.0070(10) | -0.0137(11) |
| C(14) | 0.0251(16) | 0.0276(16) | 0.055(2)   | 0.0180(14)  | -0.0094(14) | -0.0172(13) |
| C(15) | 0.0213(14) | 0.0217(14) | 0.0328(15) | 0.0046(12)  | -0.0041(12) | -0.0106(12) |
| C(16) | 0.0204(13) | 0.0163(12) | 0.0104(11) | 0.0008(9)   | -0.0053(10) | -0.0084(10) |
| C(17) | 0.0208(13) | 0.0213(13) | 0.0141(12) | -0.0013(10) | -0.0031(10) | -0.0105(11) |
| C(18) | 0.0282(15) | 0.0372(17) | 0.0139(12) | 0.0047(11)  | -0.0023(11) | -0.0189(13) |
| C(19) | 0.0312(16) | 0.0422(18) | 0.0162(13) | 0.0091(12)  | -0.0090(12) | -0.0147(14) |
| C(20) | 0.0209(14) | 0.0389(17) | 0.0189(13) | 0.0035(12)  | -0.0096(11) | -0.0105(13) |
| C(21) | 0.0187(13) | 0.0247(14) | 0.0138(12) | 0.0006(10)  | -0.0032(10) | -0.0099(11) |
| C(22) | 0.0208(14) | 0.0354(16) | 0.0148(12) | 0.0019(11)  | -0.0037(11) | -0.0144(13) |
| C(23) | 0.039(2)   | 0.054(2)   | 0.058(2)   | 0.0015(18)  | -0.0146(17) | -0.0326(18) |
| C(24) | 0.0273(16) | 0.0382(18) | 0.0324(16) | -0.0014(14) | -0.0083(13) | -0.0065(14) |
| C(25) | 0.0179(13) | 0.0304(15) | 0.0180(13) | 0.0010(11)  | -0.0051(10) | -0.0092(12) |
| C(26) | 0.052(2)   | 0.064(3)   | 0.041(2)   | -0.0132(18) | 0.0120(17)  | -0.042(2)   |
| C(27) | 0.035(2)   | 0.0341(19) | 0.063(2)   | 0.0033(17)  | 0.0224(17)  | -0.0072(16) |

|       |            |            |            |            |             |             |
|-------|------------|------------|------------|------------|-------------|-------------|
| S(1)  | 0.0201(3)  | 0.0133(3)  | 0.0168(3)  | 0.0022(2)  | -0.0033(2)  | -0.0097(3)  |
| F(1)  | 0.0236(8)  | 0.0371(10) | 0.0286(9)  | 0.0055(7)  | -0.0055(7)  | -0.0188(8)  |
| F(2)  | 0.0326(10) | 0.0306(9)  | 0.0356(10) | 0.0174(8)  | -0.0118(8)  | -0.0102(8)  |
| F(3)  | 0.0339(10) | 0.0292(9)  | 0.0324(9)  | -0.0139(7) | 0.0002(8)   | -0.0104(8)  |
| O(1)  | 0.0251(10) | 0.0174(9)  | 0.0238(9)  | 0.0029(7)  | -0.0045(8)  | -0.0137(8)  |
| O(2)  | 0.0296(11) | 0.0240(10) | 0.0252(10) | 0.0115(8)  | -0.0099(8)  | -0.0163(9)  |
| O(3)  | 0.0331(11) | 0.0213(10) | 0.0209(9)  | -0.0036(8) | -0.0011(8)  | -0.0165(9)  |
| C(28) | 0.0249(14) | 0.0199(13) | 0.0192(13) | 0.0029(10) | -0.0040(11) | -0.0119(12) |
| Cl(1) | 0.0700(7)  | 0.0586(6)  | 0.0750(7)  | 0.0331(5)  | -0.0534(6)  | -0.0383(5)  |
| Cl(2) | 0.0746(8)  | 0.0777(8)  | 0.0585(6)  | 0.0070(6)  | -0.0260(6)  | -0.0318(6)  |
| C(29) | 0.080(3)   | 0.055(3)   | 0.197(7)   | 0.047(4)   | -0.089(4)   | -0.046(3)   |

Table S10. Bond lengths [ $\text{\AA}$ ] for  $2_{\text{Br}}\cdot\text{CF}_3\text{SO}_3\cdot\text{CH}_2\text{Cl}_2$ .

| atom-atom    | distance   | atom-atom    | distance   |
|--------------|------------|--------------|------------|
| Br(1)-C(1)   | 1.837(2)   | N(1)-C(1)    | 1.336(3)   |
| N(1)-C(2)    | 1.391(3)   | N(1)-C(4)    | 1.461(3)   |
| N(2)-C(1)    | 1.339(3)   | N(2)-C(3)    | 1.388(3)   |
| N(2)-C(16)   | 1.454(3)   | C(2)-C(3)    | 1.344(3)   |
| C(4)-C(9)    | 1.394(3)   | C(4)-C(5)    | 1.399(3)   |
| C(5)-C(6)    | 1.401(3)   | C(5)-C(10)   | 1.520(3)   |
| C(6)-C(7)    | 1.385(4)   | C(7)-C(8)    | 1.388(4)   |
| C(8)-C(9)    | 1.396(3)   | C(9)-C(13)   | 1.514(3)   |
| C(10)-C(11)  | 1.534(3)   | C(10)-C(12)  | 1.535(4)   |
| C(13)-C(15)  | 1.527(4)   | C(13)-C(14)  | 1.531(4)   |
| C(16)-C(17)  | 1.393(4)   | C(16)-C(21)  | 1.401(4)   |
| C(17)-C(18)  | 1.399(4)   | C(17)-C(22)  | 1.514(4)   |
| C(18)-C(19)  | 1.379(4)   | C(19)-C(20)  | 1.384(4)   |
| C(20)-C(21)  | 1.389(4)   | C(21)-C(25)  | 1.523(4)   |
| C(22)-C(24)  | 1.526(4)   | C(22)-C(23)  | 1.538(4)   |
| C(25)-C(27)  | 1.507(4)   | C(25)-C(26)  | 1.530(4)   |
| S(1)-O(3)    | 1.4426(18) | S(1)-O(1)    | 1.4455(18) |
| S(1)-O(2)    | 1.4463(18) | S(1)-C(28)   | 1.820(3)   |
| F(1)-C(28)   | 1.341(3)   | F(2)-C(28)   | 1.333(3)   |
| F(3)-C(28)   | 1.334(3)   | Cl(1)-C(29)  | 1.760(5)   |
| Cl(2)-C(29)  | 1.723(5)   | C(2)-H(2A)   | 0.9500     |
| C(3)-H(3A)   | 0.9500     | C(6)-H(6A)   | 0.9500     |
| C(7)-H(7A)   | 0.9500     | C(8)-H(8A)   | 0.9500     |
| C(10)-H(10A) | 1.0000     | C(11)-H(11A) | 0.9800     |
| C(11)-H(11B) | 0.9800     | C(11)-H(11C) | 0.9800     |
| C(12)-H(12A) | 0.9800     | C(12)-H(12B) | 0.9800     |
| C(12)-H(12C) | 0.9800     | C(13)-H(13A) | 1.0000     |
| C(14)-H(14A) | 0.9800     | C(14)-H(14B) | 0.9800     |
| C(14)-H(14C) | 0.9800     | C(15)-H(15A) | 0.9800     |
| C(15)-H(15B) | 0.9800     | C(15)-H(15C) | 0.9800     |
| C(18)-H(18A) | 0.9500     | C(19)-H(19A) | 0.9500     |
| C(20)-H(20A) | 0.9500     | C(22)-H(22A) | 1.0000     |
| C(23)-H(23A) | 0.9800     | C(23)-H(23B) | 0.9800     |
| C(23)-H(23C) | 0.9800     | C(24)-H(24A) | 0.9800     |
| C(24)-H(24B) | 0.9800     | C(24)-H(24C) | 0.9800     |
| C(25)-H(25A) | 1.0000     | C(26)-H(26A) | 0.9800     |
| C(26)-H(26B) | 0.9800     | C(26)-H(26C) | 0.9800     |
| C(27)-H(27A) | 0.9800     | C(27)-H(27B) | 0.9800     |
| C(27)-H(27C) | 0.9800     | C(29)-H(29A) | 0.9900     |
| C(29)-H(29B) | 0.9900     |              |            |

Table S11. Bond angles [°] for **2<sub>Br</sub>**·CF<sub>3</sub>SO<sub>3</sub>·CH<sub>2</sub>Cl<sub>2</sub>.

| atom-atom-atom      | angle      | atom-atom-atom      | angle      |
|---------------------|------------|---------------------|------------|
| C(1)-N(1)-C(2)      | 108.44(19) | C(1)-N(1)-C(4)      | 126.89(19) |
| C(2)-N(1)-C(4)      | 124.16(19) | C(1)-N(2)-C(3)      | 108.27(19) |
| C(1)-N(2)-C(16)     | 125.8(2)   | C(3)-N(2)-C(16)     | 125.2(2)   |
| N(1)-C(1)-N(2)      | 108.6(2)   | N(1)-C(1)-Br(1)     | 125.93(17) |
| N(2)-C(1)-Br(1)     | 125.44(17) | C(3)-C(2)-N(1)      | 107.2(2)   |
| C(2)-C(3)-N(2)      | 107.5(2)   | C(9)-C(4)-C(5)      | 124.5(2)   |
| C(4)-C(5)-C(6)      | 116.3(2)   | C(4)-C(5)-C(10)     | 122.7(2)   |
| C(6)-C(5)-C(10)     | 121.0(2)   | C(7)-C(6)-C(5)      | 120.8(2)   |
| C(9)-C(4)-N(1)      | 118.5(2)   | C(5)-C(4)-N(1)      | 117.0(2)   |
| C(6)-C(7)-C(8)      | 120.9(2)   | C(7)-C(8)-C(9)      | 120.7(2)   |
| C(4)-C(9)-C(8)      | 116.7(2)   | C(4)-C(9)-C(13)     | 123.0(2)   |
| C(8)-C(9)-C(13)     | 120.3(2)   | C(5)-C(10)-C(11)    | 112.5(2)   |
| C(5)-C(10)-C(12)    | 110.6(2)   | C(11)-C(10)-C(12)   | 110.6(2)   |
| C(9)-C(13)-C(15)    | 111.6(2)   | C(9)-C(13)-C(14)    | 110.2(2)   |
| C(15)-C(13)-C(14)   | 110.8(2)   | C(17)-C(16)-C(21)   | 124.2(2)   |
| C(17)-C(16)-N(2)    | 118.8(2)   | C(21)-C(16)-N(2)    | 116.9(2)   |
| C(16)-C(17)-C(18)   | 116.4(2)   | C(16)-C(17)-C(22)   | 123.4(2)   |
| C(18)-C(17)-C(22)   | 120.2(2)   | C(19)-C(18)-C(17)   | 121.0(3)   |
| C(18)-C(19)-C(20)   | 120.7(3)   | C(19)-C(20)-C(21)   | 121.1(3)   |
| C(20)-C(21)-C(16)   | 116.5(2)   | C(20)-C(21)-C(25)   | 120.4(2)   |
| C(16)-C(21)-C(25)   | 123.0(2)   | C(17)-C(22)-C(24)   | 110.7(2)   |
| C(17)-C(22)-C(23)   | 110.8(2)   | C(24)-C(22)-C(23)   | 110.5(3)   |
| C(27)-C(25)-C(21)   | 111.2(2)   | C(27)-C(25)-C(26)   | 111.8(3)   |
| C(21)-C(25)-C(26)   | 111.7(2)   | O(3)-S(1)-O(1)      | 115.35(11) |
| O(3)-S(1)-O(2)      | 115.44(11) | O(1)-S(1)-O(2)      | 114.58(11) |
| O(3)-S(1)-C(28)     | 101.92(12) | O(1)-S(1)-C(28)     | 103.72(12) |
| O(2)-S(1)-C(28)     | 103.24(12) | F(2)-C(28)-F(3)     | 107.9(2)   |
| F(2)-C(28)-F(1)     | 107.3(2)   | F(3)-C(28)-F(1)     | 107.2(2)   |
| F(2)-C(28)-S(1)     | 111.39(18) | F(3)-C(28)-S(1)     | 112.15(18) |
| F(1)-C(28)-S(1)     | 110.74(18) | Cl(2)-C(29)-Cl(1)   | 114.4(2)   |
| C(3)-C(2)-H(2A)     | 126.4      | N(1)-C(2)-H(2A)     | 126.4      |
| C(2)-C(3)-H(3A)     | 126.2      | N(2)-C(3)-H(3A)     | 126.2      |
| C(7)-C(6)-H(6A)     | 119.6      | C(5)-C(6)-H(6A)     | 119.6      |
| C(6)-C(7)-H(7A)     | 119.5      | C(8)-C(7)-H(7A)     | 119.5      |
| C(7)-C(8)-H(8A)     | 119.7      | C(9)-C(8)-H(8A)     | 119.7      |
| C(5)-C(10)-H(10A)   | 107.6      | C(11)-C(10)-H(10A)  | 107.6      |
| C(12)-C(10)-H(10A)  | 107.6      | C(10)-C(11)-H(11A)  | 109.5      |
| C(10)-C(11)-H(11B)  | 109.5      | H(11A)-C(11)-H(11B) | 109.5      |
| C(10)-C(11)-H(11C)  | 109.5      | H(11A)-C(11)-H(11C) | 109.5      |
| H(11B)-C(11)-H(11C) | 109.5      | C(10)-C(12)-H(12A)  | 109.5      |
| C(10)-C(12)-H(12B)  | 109.5      | H(12A)-C(12)-H(12B) | 109.5      |
| C(10)-C(12)-H(12C)  | 109.5      | H(12A)-C(12)-H(12C) | 109.5      |

|                     |       |                     |       |
|---------------------|-------|---------------------|-------|
| H(12B)-C(12)-H(12C) | 109.5 | C(9)-C(13)-H(13A)   | 108.0 |
| C(15)-C(13)-H(13A)  | 108.0 | C(14)-C(13)-H(13A)  | 108.0 |
| C(13)-C(14)-H(14A)  | 109.5 | C(13)-C(14)-H(14B)  | 109.5 |
| H(14A)-C(14)-H(14B) | 109.5 | C(13)-C(14)-H(14C)  | 109.5 |
| H(14A)-C(14)-H(14C) | 109.5 | H(14B)-C(14)-H(14C) | 109.5 |
| C(13)-C(15)-H(15A)  | 109.5 | C(13)-C(15)-H(15B)  | 109.5 |
| H(15A)-C(15)-H(15B) | 109.5 | C(13)-C(15)-H(15C)  | 109.5 |
| H(15A)-C(15)-H(15C) | 109.5 | H(15B)-C(15)-H(15C) | 109.5 |
| C(19)-C(18)-H(18A)  | 119.5 | C(17)-C(18)-H(18A)  | 119.5 |
| C(18)-C(19)-H(19A)  | 119.6 | C(20)-C(19)-H(19A)  | 119.6 |
| C(19)-C(20)-H(20A)  | 119.5 | C(21)-C(20)-H(20A)  | 119.5 |
| C(17)-C(22)-H(22A)  | 108.3 | C(24)-C(22)-H(22A)  | 108.3 |
| C(23)-C(22)-H(22A)  | 108.3 | C(22)-C(23)-H(23A)  | 109.5 |
| C(22)-C(23)-H(23B)  | 109.5 | H(23A)-C(23)-H(23B) | 109.5 |
| C(22)-C(23)-H(23C)  | 109.5 | H(23A)-C(23)-H(23C) | 109.5 |
| H(23B)-C(23)-H(23C) | 109.5 | C(22)-C(24)-H(24A)  | 109.5 |
| C(22)-C(24)-H(24B)  | 109.5 | H(24A)-C(24)-H(24B) | 109.5 |
| C(22)-C(24)-H(24C)  | 109.5 | H(24A)-C(24)-H(24C) | 109.5 |
| H(24B)-C(24)-H(24C) | 109.5 | C(27)-C(25)-H(25A)  | 107.3 |
| C(21)-C(25)-H(25A)  | 107.3 | C(26)-C(25)-H(25A)  | 107.3 |
| C(25)-C(26)-H(26A)  | 109.5 | C(25)-C(26)-H(26B)  | 109.5 |
| H(26A)-C(26)-H(26B) | 109.5 | C(25)-C(26)-H(26C)  | 109.5 |
| H(26A)-C(26)-H(26C) | 109.5 | H(26B)-C(26)-H(26C) | 109.5 |
| C(25)-C(27)-H(27A)  | 109.5 | C(25)-C(27)-H(27B)  | 109.5 |
| H(27A)-C(27)-H(27B) | 109.5 | C(25)-C(27)-H(27C)  | 109.5 |
| H(27A)-C(27)-H(27C) | 109.5 | H(27B)-C(27)-H(27C) | 109.5 |
| Cl(2)-C(29)-H(29A)  | 108.7 | Cl(1)-C(29)-H(29A)  | 108.7 |
| Cl(2)-C(29)-H(29B)  | 108.7 | Cl(1)-C(29)-H(29B)  | 108.7 |
| H(29A)-C(29)-H(29B) | 107.6 |                     |       |

Table S12. Torsion angles [°] for **2<sub>Br</sub>**·CF<sub>3</sub>SO<sub>3</sub>·CH<sub>2</sub>Cl<sub>2</sub>.

| atom-atom-atom-atom | angle  | atom-atom-atom-atom   | angle       |
|---------------------|--------|-----------------------|-------------|
| C(2)-N(1)-C(1)-N(2) | 0.2(3) | C(4)-N(1)-C(1)-N(2)   | -171.8(2)   |
|                     |        | C(2)-N(1)-C(1)-Br(1)  | -177.85(17) |
|                     |        | C(4)-N(1)-C(1)-Br(1)  | 10.1(3)     |
|                     |        | C(3)-N(2)-C(1)-N(1)   | -0.3(3)     |
|                     |        | C(16)-N(2)-C(1)-N(1)  | 170.2(2)    |
|                     |        | C(3)-N(2)-C(1)-Br(1)  | 177.74(18)  |
|                     |        | C(16)-N(2)-C(1)-Br(1) | -11.7(3)    |
|                     |        | C(1)-N(1)-C(2)-C(3)   | 0.0(3)      |
|                     |        | C(4)-N(1)-C(2)-C(3)   | 172.3(2)    |
|                     |        | N(1)-C(2)-C(3)-N(2)   | -0.2(3)     |
|                     |        | C(1)-N(2)-C(3)-C(2)   | 0.3(3)      |
|                     |        | C(16)-N(2)-C(3)-C(2)  | -170.3(2)   |
|                     |        | C(1)-N(1)-C(4)-C(9)   | -95.6(3)    |
|                     |        | C(2)-N(1)-C(4)-C(9)   | 93.6(3)     |
|                     |        | C(1)-N(1)-C(4)-C(5)   | 87.2(3)     |
|                     |        | C(2)-N(1)-C(4)-C(5)   | -83.7(3)    |
|                     |        | C(9)-C(4)-C(5)-C(6)   | -1.9(4)     |
|                     |        | N(1)-C(4)-C(5)-C(6)   | 175.1(2)    |
|                     |        | C(9)-C(4)-C(5)-C(10)  | 178.8(2)    |
|                     |        | N(1)-C(4)-C(5)-C(10)  | -4.2(3)     |
|                     |        | C(4)-C(5)-C(6)-C(7)   | 0.7(4)      |
|                     |        | C(10)-C(5)-C(6)-C(7)  | -179.9(2)   |
|                     |        | C(5)-C(6)-C(7)-C(8)   | 0.9(4)      |
|                     |        | C(6)-C(7)-C(8)-C(9)   | -1.4(4)     |
|                     |        | C(5)-C(4)-C(9)-C(8)   | 1.4(4)      |
|                     |        | N(1)-C(4)-C(9)-C(8)   | -175.6(2)   |
|                     |        | C(5)-C(4)-C(9)-C(13)  | -178.1(2)   |
|                     |        | N(1)-C(4)-C(9)-C(13)  | 5.0(3)      |
|                     |        | C(7)-C(8)-C(9)-C(4)   | 0.3(4)      |
|                     |        | C(7)-C(8)-C(9)-C(13)  | 179.8(2)    |
|                     |        | C(4)-C(5)-C(10)-C(11) | -137.7(2)   |
|                     |        | C(6)-C(5)-C(10)-C(11) | 43.0(3)     |
|                     |        | C(4)-C(5)-C(10)-C(12) | 98.0(3)     |
|                     |        | C(6)-C(5)-C(10)-C(12) | -81.3(3)    |
|                     |        | C(4)-C(9)-C(13)-C(15) | -118.3(3)   |
|                     |        | C(8)-C(9)-C(13)-C(15) | 62.3(3)     |
|                     |        | C(4)-C(9)-C(13)-C(14) | 118.2(3)    |
|                     |        | C(8)-C(9)-C(13)-C(14) | -61.3(3)    |
|                     |        | C(1)-N(2)-C(16)-C(17) | 94.9(3)     |
|                     |        | C(3)-N(2)-C(16)-C(17) | -96.1(3)    |
|                     |        | C(1)-N(2)-C(16)-C(21) | -86.5(3)    |
|                     |        | C(3)-N(2)-C(16)-C(21) | 82.5(3)     |



|                         |             |
|-------------------------|-------------|
| C(21)-C(16)-C(17)-C(18) | -0.6(4)     |
| N(2)-C(16)-C(17)-C(18)  | 177.9(2)    |
| C(21)-C(16)-C(17)-C(22) | 179.8(2)    |
| N(2)-C(16)-C(17)-C(22)  | -1.8(4)     |
| C(16)-C(17)-C(18)-C(19) | 0.9(4)      |
| C(22)-C(17)-C(18)-C(19) | -179.4(3)   |
| C(17)-C(18)-C(19)-C(20) | -0.4(5)     |
| C(18)-C(19)-C(20)-C(21) | -0.4(5)     |
| C(19)-C(20)-C(21)-C(16) | 0.7(4)      |
| C(19)-C(20)-C(21)-C(25) | -179.9(3)   |
| C(17)-C(16)-C(21)-C(20) | -0.2(4)     |
| N(2)-C(16)-C(21)-C(20)  | -178.7(2)   |
| C(17)-C(16)-C(21)-C(25) | -179.5(2)   |
| N(2)-C(16)-C(21)-C(25)  | 2.0(4)      |
| C(16)-C(17)-C(22)-C(24) | 112.4(3)    |
| C(18)-C(17)-C(22)-C(24) | -67.3(3)    |
| C(16)-C(17)-C(22)-C(23) | -124.7(3)   |
| C(18)-C(17)-C(22)-C(23) | 55.6(3)     |
| C(20)-C(21)-C(25)-C(27) | -59.1(4)    |
| C(16)-C(21)-C(25)-C(27) | 120.2(3)    |
| C(20)-C(21)-C(25)-C(26) | 66.7(4)     |
| C(16)-C(21)-C(25)-C(26) | -114.1(3)   |
| O(3)-S(1)-C(28)-F(2)    | 59.1(2)     |
| O(1)-S(1)-C(28)-F(2)    | -61.1(2)    |
| O(2)-S(1)-C(28)-F(2)    | 179.11(18)  |
| O(3)-S(1)-C(28)-F(3)    | -179.92(18) |
| O(1)-S(1)-C(28)-F(3)    | 59.9(2)     |
| O(2)-S(1)-C(28)-F(3)    | -59.9(2)    |
| O(3)-S(1)-C(28)-F(1)    | -60.26(19)  |
| O(1)-S(1)-C(28)-F(1)    | 179.60(17)  |
| O(2)-S(1)-C(28)-F(1)    | 59.78(19)   |

Figure S3. Crystal structure for  $2\text{I}\cdot\text{I}_3$ .

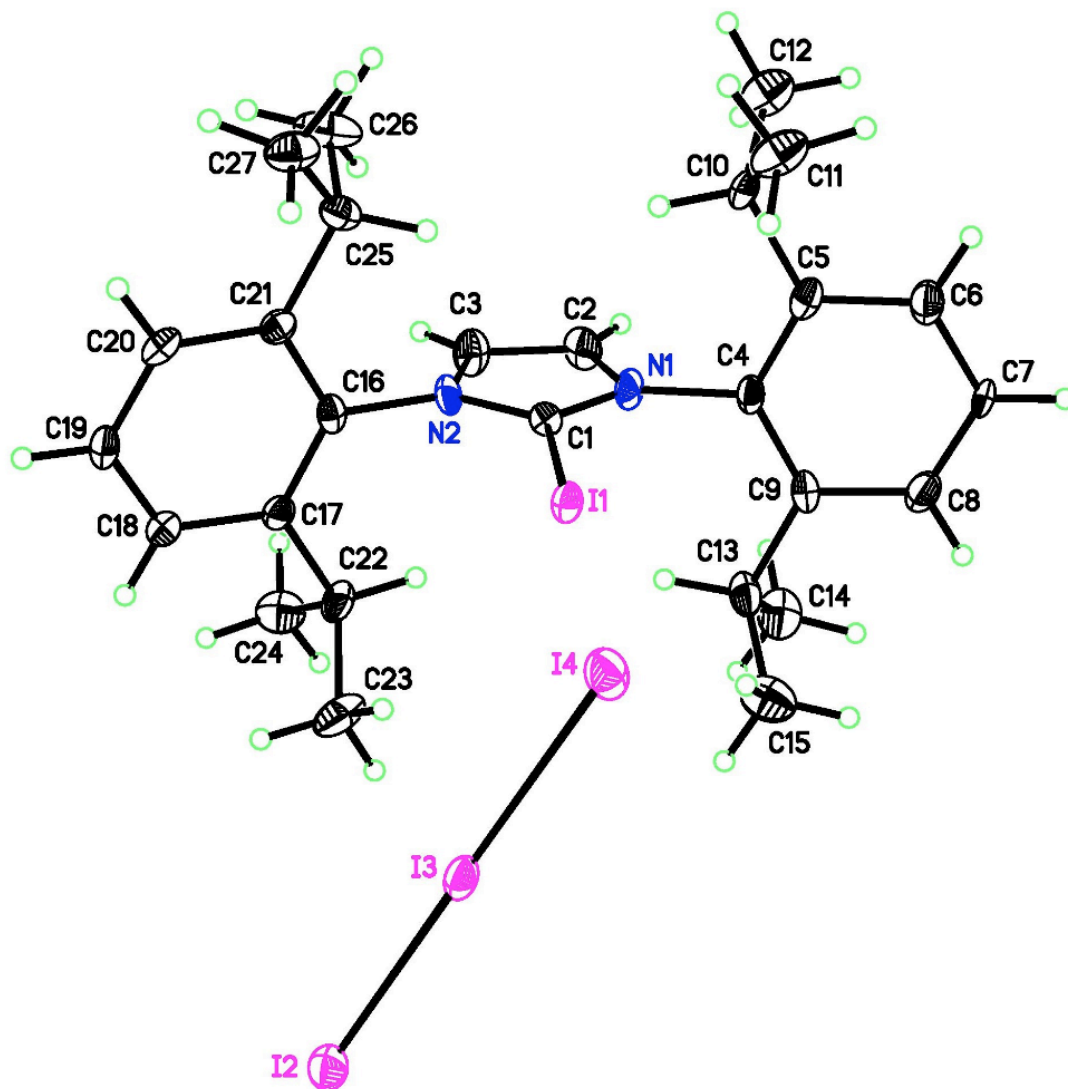

Table S13 Crystal data and structure refinement for  $2_1I_3$ .

|                                        |                                                                                                                                                  |
|----------------------------------------|--------------------------------------------------------------------------------------------------------------------------------------------------|
| Empirical formula                      | $C_{27}H_{36}I_4N_2$                                                                                                                             |
| Formula weight                         | 896.18                                                                                                                                           |
| Temperature                            | 100(2) K                                                                                                                                         |
| Wavelength                             | 1.54178 Å                                                                                                                                        |
| Crystal system                         | triclinic                                                                                                                                        |
| Space group                            | P-1                                                                                                                                              |
| Unit cell dimensions                   | $a = 10.0574(3)$ Å $\alpha = 89.812(2)^\circ$<br>$b = 10.0847(2)$ Å $\beta = 72.816(2)^\circ$<br>$c = 16.5285(4)$ Å $\gamma = 77.8020(10)^\circ$ |
| Volume                                 | $1562.28(7)$ Å <sup>3</sup>                                                                                                                      |
| Z                                      | 2                                                                                                                                                |
| Density (calculated)                   | $1.905$ g.cm <sup>-3</sup>                                                                                                                       |
| Absorption coefficient ( $\mu$ )       | $31.441$ mm <sup>-1</sup>                                                                                                                        |
| F(000)                                 | 848                                                                                                                                              |
| Crystal size                           | $0.17 \times 0.08 \times 0.04$ mm <sup>3</sup>                                                                                                   |
| $\theta$ range for data collection     | 2.80 to $69.56^\circ$                                                                                                                            |
| Index ranges                           | $-12 \leq h \leq 11$ , $-12 \leq k \leq 12$ , $-18 \leq l \leq 20$                                                                               |
| Reflections collected                  | 15215                                                                                                                                            |
| Independent reflections                | 5458 [ $R_{int} = 0.0427$ ]                                                                                                                      |
| Completeness to $\theta = 69.56^\circ$ | 93.0 %                                                                                                                                           |
| Absorption correction                  | numerical                                                                                                                                        |
| Max. and min. transmission             | 0.5844 and 0.2559                                                                                                                                |
| Refinement method                      | Full-matrix least-squares on $F^2$                                                                                                               |
| Data / restraints / parameters         | 5458 / 0 / 306                                                                                                                                   |
| Goodness-of-fit on $F^2$               | 1.028                                                                                                                                            |
| Final R indices [ $I > 2\sigma(I)$ ]   | $R_1 = 0.0350$ , $wR_2 = 0.0779$                                                                                                                 |
| R indices (all data)                   | $R_1 = 0.0489$ , $wR_2 = 0.0836$                                                                                                                 |
| Largest diff. peak and hole            | 1.114 and $-1.097$ e <sup>-</sup> .Å <sup>-3</sup>                                                                                               |

Table S14. Atomic coordinates and equivalent isotropic displacement parameters ( $\text{\AA}^2$ ) for  $2\mathbf{r}\cdot\mathbf{I}_3$ .  $U(\text{eq})$  is defined as one third of the trace of the orthogonalized  $U_{ij}$  tensor.

|       | x           | y          | z          | $U(\text{eq})$ |
|-------|-------------|------------|------------|----------------|
| I(1)  | 0.41104(4)  | 0.47752(4) | 0.26810(2) | 0.016(1)       |
| N(1)  | 0.5259(5)   | 0.1899(5)  | 0.3119(3)  | 0.019(1)       |
| N(2)  | 0.5355(5)   | 0.1912(5)  | 0.1796(3)  | 0.019(1)       |
| C(1)  | 0.5002(6)   | 0.2710(5)  | 0.2510(4)  | 0.014(1)       |
| C(2)  | 0.5768(7)   | 0.0565(6)  | 0.2782(4)  | 0.023(1)       |
| C(3)  | 0.5818(7)   | 0.0585(6)  | 0.1946(4)  | 0.024(1)       |
| C(4)  | 0.5102(6)   | 0.2316(6)  | 0.3990(4)  | 0.017(1)       |
| C(5)  | 0.6276(7)   | 0.2612(6)  | 0.4171(4)  | 0.019(1)       |
| C(6)  | 0.6131(7)   | 0.2889(6)  | 0.5026(4)  | 0.023(1)       |
| C(7)  | 0.4871(6)   | 0.2865(7)  | 0.5653(4)  | 0.021(1)       |
| C(8)  | 0.3709(7)   | 0.2601(6)  | 0.5446(4)  | 0.023(1)       |
| C(9)  | 0.3797(7)   | 0.2307(6)  | 0.4603(4)  | 0.019(1)       |
| C(10) | 0.7677(6)   | 0.2639(6)  | 0.3498(4)  | 0.021(1)       |
| C(11) | 0.8063(7)   | 0.4016(6)  | 0.3556(5)  | 0.030(2)       |
| C(12) | 0.8864(7)   | 0.1488(7)  | 0.3574(5)  | 0.033(2)       |
| C(13) | 0.2480(7)   | 0.2064(7)  | 0.4398(4)  | 0.023(1)       |
| C(14) | 0.2018(8)   | 0.0831(7)  | 0.4845(5)  | 0.033(2)       |
| C(15) | 0.1250(8)   | 0.3332(7)  | 0.4652(5)  | 0.035(2)       |
| C(16) | 0.5245(6)   | 0.2367(5)  | 0.0967(4)  | 0.015(1)       |
| C(17) | 0.4027(6)   | 0.2256(6)  | 0.0760(4)  | 0.017(1)       |
| C(18) | 0.3965(6)   | 0.2640(6)  | -0.0045(4) | 0.020(1)       |
| C(19) | 0.5073(7)   | 0.3090(6)  | -0.0594(4) | 0.020(1)       |
| C(20) | 0.6262(6)   | 0.3206(6)  | -0.0357(4) | 0.022(1)       |
| C(21) | 0.6394(6)   | 0.2837(6)  | 0.0427(4)  | 0.017(1)       |
| C(22) | 0.2764(7)   | 0.1789(6)  | 0.1371(4)  | 0.022(1)       |
| C(23) | 0.1420(7)   | 0.2950(7)  | 0.1550(5)  | 0.033(2)       |
| C(24) | 0.2531(7)   | 0.0513(7)  | 0.0992(5)  | 0.030(2)       |
| C(25) | 0.7724(6)   | 0.2889(6)  | 0.0671(4)  | 0.020(1)       |
| C(26) | 0.8774(7)   | 0.1505(7)  | 0.0456(6)  | 0.039(2)       |
| C(27) | 0.8464(7)   | 0.3997(7)  | 0.0227(5)  | 0.028(2)       |
| I(2)  | -0.22428(4) | 0.69457(4) | 0.19300(3) | 0.024(1)       |

|        |            |            |            |          |
|--------|------------|------------|------------|----------|
| I(3)   | 0.00868(4) | 0.75069(4) | 0.24538(2) | 0.020(1) |
| I(4)   | 0.24481(5) | 0.81179(4) | 0.29950(3) | 0.027(1) |
| H(2A)  | 0.6030     | -0.0211    | 0.3075     | 0.027    |
| H(3A)  | 0.6117     | -0.0176    | 0.1546     | 0.029    |
| H(6A)  | 0.6908     | 0.3096     | 0.5179     | 0.028    |
| H(7A)  | 0.4803     | 0.3030     | 0.6231     | 0.026    |
| H(8A)  | 0.2842     | 0.2621     | 0.5883     | 0.028    |
| H(10A) | 0.7545     | 0.2519     | 0.2929     | 0.025    |
| H(11A) | 0.7252     | 0.4745     | 0.3547     | 0.045    |
| H(11B) | 0.8891     | 0.4070     | 0.3073     | 0.045    |
| H(11C) | 0.8293     | 0.4115     | 0.4086     | 0.045    |
| H(12A) | 0.8622     | 0.0616     | 0.3493     | 0.049    |
| H(12B) | 0.8985     | 0.1561     | 0.4138     | 0.049    |
| H(12C) | 0.9755     | 0.1541     | 0.3140     | 0.049    |
| H(13A) | 0.2737     | 0.1865     | 0.3772     | 0.028    |
| H(14A) | 0.2826     | 0.0045     | 0.4695     | 0.049    |
| H(14B) | 0.1233     | 0.0627     | 0.4665     | 0.049    |
| H(14C) | 0.1699     | 0.1032     | 0.5461     | 0.049    |
| H(15A) | 0.1572     | 0.4114     | 0.4370     | 0.053    |
| H(15B) | 0.0953     | 0.3519     | 0.5268     | 0.053    |
| H(15C) | 0.0442     | 0.3172     | 0.4479     | 0.053    |
| H(18A) | 0.3150     | 0.2589     | -0.0212    | 0.024    |
| H(19A) | 0.5028     | 0.3325     | -0.1144    | 0.023    |
| H(20A) | 0.7000     | 0.3547     | -0.0742    | 0.026    |
| H(22A) | 0.2980     | 0.1576     | 0.1917     | 0.026    |
| H(23A) | 0.0603     | 0.2648     | 0.1929     | 0.049    |
| H(23B) | 0.1228     | 0.3195     | 0.1015     | 0.049    |
| H(23C) | 0.1577     | 0.3743     | 0.1820     | 0.049    |
| H(24A) | 0.3406     | -0.0199    | 0.0865     | 0.044    |
| H(24B) | 0.2284     | 0.0722     | 0.0467     | 0.044    |
| H(24C) | 0.1752     | 0.0197     | 0.1398     | 0.044    |
| H(25A) | 0.7439     | 0.3095     | 0.1298     | 0.024    |
| H(26A) | 0.8304     | 0.0801     | 0.0745     | 0.059    |
| H(26B) | 0.9605     | 0.1532     | 0.0644     | 0.059    |
| H(26C) | 0.9082     | 0.1295     | -0.0158    | 0.059    |
| H(27A) | 0.7762     | 0.4861     | 0.0305     | 0.042    |

|        |        |        |         |       |
|--------|--------|--------|---------|-------|
| H(27B) | 0.8889 | 0.3735 | -0.0380 | 0.042 |
| H(27C) | 0.9214 | 0.4102 | 0.0473  | 0.042 |

Table S15. Anisotropic displacement parameters ( $\text{\AA}^2$ ) for  $2\text{I}_3$ .

The anisotropic displacement factor exponent takes the form:

$$-2\pi^2 [ h^2 a^{*2} U_{11} + \dots + 2 h k a^* b^* U_{12} ]$$

|       | $U_{11}$  | $U_{22}$  | $U_{33}$  | $U_{23}$   | $U_{13}$   | $U_{12}$   |
|-------|-----------|-----------|-----------|------------|------------|------------|
| I(1)  | 0.0215(2) | 0.0142(2) | 0.0122(2) | -0.0009(1) | -0.0047(1) | -0.0026(1) |
| N(1)  | 0.025(3)  | 0.017(2)  | 0.014(3)  | -0.007(2)  | -0.006(2)  | 0.001(2)   |
| N(2)  | 0.023(3)  | 0.023(3)  | 0.012(3)  | -0.003(2)  | -0.009(2)  | -0.005(2)  |
| C(1)  | 0.016(3)  | 0.012(3)  | 0.016(3)  | 0.002(2)   | -0.006(2)  | -0.003(2)  |
| C(2)  | 0.029(3)  | 0.017(3)  | 0.022(4)  | 0.007(3)   | -0.011(3)  | 0.000(3)   |
| C(3)  | 0.034(4)  | 0.017(3)  | 0.021(3)  | -0.005(3)  | -0.009(3)  | -0.004(3)  |
| C(4)  | 0.022(3)  | 0.016(3)  | 0.012(3)  | -0.003(2)  | -0.007(2)  | 0.002(2)   |
| C(5)  | 0.024(3)  | 0.017(3)  | 0.012(3)  | 0.002(2)   | -0.002(2)  | -0.002(2)  |
| C(6)  | 0.028(3)  | 0.024(3)  | 0.017(3)  | -0.002(3)  | -0.008(3)  | -0.002(3)  |
| C(7)  | 0.020(3)  | 0.034(3)  | 0.006(3)  | -0.004(3)  | -0.001(2)  | -0.002(3)  |
| C(8)  | 0.024(3)  | 0.025(3)  | 0.016(3)  | -0.002(3)  | -0.001(3)  | -0.001(3)  |
| C(9)  | 0.026(3)  | 0.020(3)  | 0.013(3)  | 0.001(3)   | -0.009(2)  | -0.006(3)  |
| C(10) | 0.020(3)  | 0.026(3)  | 0.012(3)  | -0.008(3)  | 0.000(2)   | -0.002(3)  |
| C(11) | 0.027(3)  | 0.021(3)  | 0.034(4)  | 0.004(3)   | 0.003(3)   | -0.002(3)  |
| C(12) | 0.031(4)  | 0.025(3)  | 0.035(4)  | 0.004(3)   | -0.001(3)  | -0.003(3)  |
| C(13) | 0.029(3)  | 0.030(3)  | 0.016(3)  | 0.005(3)   | -0.010(3)  | -0.014(3)  |
| C(14) | 0.041(4)  | 0.030(4)  | 0.032(4)  | 0.003(3)   | -0.010(3)  | -0.018(3)  |
| C(15) | 0.032(4)  | 0.033(4)  | 0.046(5)  | 0.012(4)   | -0.017(3)  | -0.012(3)  |
| C(16) | 0.022(3)  | 0.009(2)  | 0.013(3)  | -0.002(2)  | -0.007(2)  | 0.000(2)   |
| C(17) | 0.016(3)  | 0.018(3)  | 0.014(3)  | -0.003(2)  | -0.003(2)  | -0.002(2)  |
| C(18) | 0.017(3)  | 0.023(3)  | 0.016(3)  | -0.001(3)  | -0.003(2)  | -0.002(2)  |
| C(19) | 0.025(3)  | 0.021(3)  | 0.011(3)  | 0.001(3)   | -0.005(2)  | -0.004(3)  |
| C(20) | 0.017(3)  | 0.026(3)  | 0.016(3)  | 0.000(3)   | 0.003(2)   | -0.004(2)  |
| C(21) | 0.016(3)  | 0.016(3)  | 0.016(3)  | -0.003(2)  | -0.002(2)  | 0.001(2)   |
| C(22) | 0.024(3)  | 0.027(3)  | 0.014(3)  | 0.003(3)   | -0.001(2)  | -0.010(3)  |
| C(23) | 0.023(3)  | 0.036(4)  | 0.031(4)  | -0.008(3)  | 0.007(3)   | -0.010(3)  |
| C(24) | 0.028(3)  | 0.025(3)  | 0.038(4)  | 0.006(3)   | -0.009(3)  | -0.012(3)  |
| C(25) | 0.016(3)  | 0.019(3)  | 0.024(3)  | -0.002(3)  | -0.008(2)  | -0.003(2)  |
| C(26) | 0.020(3)  | 0.032(4)  | 0.068(6)  | -0.004(4)  | -0.017(4)  | -0.005(3)  |
| C(27) | 0.020(3)  | 0.026(3)  | 0.036(4)  | -0.005(3)  | -0.005(3)  | -0.007(3)  |

|      |           |           |           |            |            |            |
|------|-----------|-----------|-----------|------------|------------|------------|
| I(2) | 0.0270(2) | 0.0257(2) | 0.0198(2) | -0.0013(2) | -0.0074(2) | -0.0032(2) |
| I(3) | 0.0244(2) | 0.0185(2) | 0.0132(2) | -0.0032(2) | -0.0033(1) | -0.0008(2) |
| I(4) | 0.0322(2) | 0.0225(2) | 0.0254(2) | -0.0048(2) | -0.0137(2) | 0.0007(2)  |



Table S16. Bond lengths [ $\text{\AA}$ ] for  $2\text{-I}_3$ .

| atom-atom    | distance  | atom-atom    | distance  |
|--------------|-----------|--------------|-----------|
| I(1)-C(1)    | 2.071(5)  | N(1)-C(1)    | 1.345(8)  |
| N(1)-C(2)    | 1.388(8)  | N(1)-C(4)    | 1.456(7)  |
| N(2)-C(1)    | 1.343(7)  | N(2)-C(3)    | 1.369(8)  |
| N(2)-C(16)   | 1.470(8)  | C(2)-C(3)    | 1.369(9)  |
| C(4)-C(5)    | 1.389(8)  | C(4)-C(9)    | 1.402(8)  |
| C(5)-C(6)    | 1.401(8)  | C(5)-C(10)   | 1.521(8)  |
| C(6)-C(7)    | 1.384(9)  | C(7)-C(8)    | 1.386(9)  |
| C(8)-C(9)    | 1.399(8)  | C(9)-C(13)   | 1.528(8)  |
| C(10)-C(12)  | 1.514(9)  | C(10)-C(11)  | 1.529(8)  |
| C(13)-C(14)  | 1.530(8)  | C(13)-C(15)  | 1.539(9)  |
| C(16)-C(17)  | 1.392(8)  | C(16)-C(21)  | 1.406(8)  |
| C(17)-C(18)  | 1.400(9)  | C(17)-C(22)  | 1.532(8)  |
| C(18)-C(19)  | 1.374(8)  | C(19)-C(20)  | 1.390(9)  |
| C(20)-C(21)  | 1.382(9)  | C(21)-C(25)  | 1.518(8)  |
| C(22)-C(24)  | 1.524(8)  | C(22)-C(23)  | 1.544(9)  |
| C(25)-C(26)  | 1.533(9)  | C(25)-C(27)  | 1.538(8)  |
| I(2)-I(3)    | 2.8847(5) | I(3)-I(4)    | 2.9491(6) |
| C(2)-H(2A)   | 0.9500    | C(3)-H(3A)   | 0.9500    |
| C(6)-H(6A)   | 0.9500    | C(7)-H(7A)   | 0.9500    |
| C(8)-H(8A)   | 0.9500    | C(10)-H(10A) | 1.0000    |
| C(11)-H(11A) | 0.9800    | C(11)-H(11B) | 0.9800    |
| C(11)-H(11C) | 0.9800    | C(12)-H(12A) | 0.9800    |
| C(12)-H(12B) | 0.9800    | C(12)-H(12C) | 0.9800    |
| C(13)-H(13A) | 1.0000    | C(14)-H(14A) | 0.9800    |
| C(14)-H(14B) | 0.9800    | C(14)-H(14C) | 0.9800    |
| C(15)-H(15A) | 0.9800    | C(15)-H(15B) | 0.9800    |
| C(15)-H(15C) | 0.9800    | C(18)-H(18A) | 0.9500    |
| C(19)-H(19A) | 0.9500    | C(20)-H(20A) | 0.9500    |
| C(22)-H(22A) | 1.0000    | C(23)-H(23A) | 0.9800    |
| C(23)-H(23B) | 0.9800    | C(23)-H(23C) | 0.9800    |
| C(24)-H(24A) | 0.9800    | C(24)-H(24B) | 0.9800    |
| C(24)-H(24C) | 0.9800    | C(25)-H(25A) | 1.0000    |
| C(26)-H(26A) | 0.9800    | C(26)-H(26B) | 0.9800    |
| C(26)-H(26C) | 0.9800    | C(27)-H(27A) | 0.9800    |
| C(27)-H(27B) | 0.9800    | C(27)-H(27C) | 0.9800    |

Table S17. Bond angles [°] for 2<sub>I</sub>I<sub>3</sub>.

| atom-atom-atom      | angle           | atom-atom-atom      | angle           |       |
|---------------------|-----------------|---------------------|-----------------|-------|
| C(1)-N(1)-C(2)      | 109.3(5)        | C(1)-N(1)-C(4)      | 126.9(5)        |       |
| C(2)-N(1)-C(4)      | 123.7(5)        | C(1)-N(2)-C(3)      | 110.3(5)        |       |
| C(1)-N(2)-C(16)     | 125.9(5)        | C(3)-N(2)-C(16)     | 123.7(5)        |       |
| N(2)-C(1)-N(1)      | 107.0(5)        | N(2)-C(1)-I(1)      | 127.3(4)        |       |
| N(1)-C(1)-I(1)      | 125.6(4)        | C(3)-C(2)-N(1)      | 106.7(6)        |       |
| C(2)-C(3)-N(2)      | 106.7(5)        | C(5)-C(4)-C(9)      | 124.2(6)        |       |
| C(5)-C(4)-N(1)      | 118.2(5)        | C(9)-C(4)-N(1)      | 117.5(5)        |       |
| C(4)-C(5)-C(6)      | 116.7(6)        | C(4)-C(5)-C(10)     | 123.7(6)        |       |
| C(6)-C(5)-C(10)     | 119.6(6)        | C(7)-C(6)-C(5)      | 120.9(6)        |       |
| C(6)-C(7)-C(8)      | 120.7(6)        | C(7)-C(8)-C(9)      | 120.8(6)        |       |
| C(8)-C(9)-C(4)      | 116.6(6)        | C(8)-C(9)-C(13)     | 119.2(6)        |       |
| C(4)-C(9)-C(13)     | 124.1(6)        | C(12)-C(10)-C(5)    | 111.3(6)        |       |
| C(12)-C(10)-C(11)   | 111.1(5)        | C(5)-C(10)-C(11)    | 110.1(5)        |       |
| C(9)-C(13)-C(14)    | 110.0(6)        | C(9)-C(13)-C(15)    | 111.1(5)        |       |
| C(14)-C(13)-C(15)   | 110.7(6)        | C(17)-C(16)-C(21)   | 124.4(6)        |       |
| C(17)-C(16)-N(2)    | 117.5(5)        | C(21)-C(16)-N(2)    | 118.1(5)        |       |
| C(16)-C(17)-C(18)   | 116.8(5)        | C(16)-C(17)-C(22)   | 123.5(6)        |       |
| C(18)-C(17)-C(22)   | 119.7(5)        | C(19)-C(18)-C(17)   | 120.5(6)        |       |
| C(18)-C(19)-C(20)   | 120.9(6)        | C(21)-C(20)-C(19)   | 121.6(6)        |       |
| C(20)-C(21)-C(16)   | 115.8(5)        | C(20)-C(21)-C(25)   | 121.8(5)        |       |
| C(16)-C(21)-C(25)   | 122.3(6)        | C(24)-C(22)-C(17)   | 110.1(5)        |       |
| C(24)-C(22)-C(23)   | 110.9(5)        | C(17)-C(22)-C(23)   | 109.1(5)        |       |
| C(21)-C(25)-C(26)   | 110.0(5)        | C(21)-C(25)-C(27)   | 112.2(5)        |       |
| C(26)-C(25)-C(27)   | 109.5(5)        | I(2)-I(3)-I(4)      | 179.251(18)     |       |
|                     | C(3)-C(2)-H(2A) | 126.7               | N(1)-C(2)-H(2A) |       |
|                     |                 | 126.7               | C(2)-C(3)-H(3A) | 126.7 |
| N(2)-C(3)-H(3A)     | 126.7           | C(7)-C(6)-H(6A)     | 119.6           |       |
| C(5)-C(6)-H(6A)     | 119.6           | C(6)-C(7)-H(7A)     | 119.6           |       |
| C(8)-C(7)-H(7A)     | 119.6           | C(7)-C(8)-H(8A)     | 119.6           |       |
| C(9)-C(8)-H(8A)     | 119.6           | C(12)-C(10)-H(10A)  | 108.1           |       |
| C(5)-C(10)-H(10A)   | 108.1           | C(11)-C(10)-H(10A)  | 108.1           |       |
| C(10)-C(11)-H(11A)  | 109.5           | C(10)-C(11)-H(11B)  | 109.5           |       |
| H(11A)-C(11)-H(11B) | 109.5           | C(10)-C(11)-H(11C)  | 109.5           |       |
| H(11A)-C(11)-H(11C) | 109.5           | H(11B)-C(11)-H(11C) | 109.5           |       |
| C(10)-C(12)-H(12A)  | 109.5           | C(10)-C(12)-H(12B)  | 109.5           |       |
| H(12A)-C(12)-H(12B) | 109.5           | C(10)-C(12)-H(12C)  | 109.5           |       |
| H(12A)-C(12)-H(12C) | 109.5           | H(12B)-C(12)-H(12C) | 109.5           |       |
| C(9)-C(13)-H(13A)   | 108.3           | C(14)-C(13)-H(13A)  | 108.3           |       |
| C(15)-C(13)-H(13A)  | 108.3           | C(13)-C(14)-H(14A)  | 109.5           |       |
| C(13)-C(14)-H(14B)  | 109.5           | H(14A)-C(14)-H(14B) | 109.5           |       |
| C(13)-C(14)-H(14C)  | 109.5           | H(14A)-C(14)-H(14C) | 109.5           |       |
| H(14B)-C(14)-H(14C) | 109.5           | C(13)-C(15)-H(15A)  | 109.5           |       |

|                     |       |                     |       |
|---------------------|-------|---------------------|-------|
| C(13)-C(15)-H(15B)  | 109.5 | H(15A)-C(15)-H(15B) | 109.5 |
| C(13)-C(15)-H(15C)  | 109.5 | H(15A)-C(15)-H(15C) | 109.5 |
| H(15B)-C(15)-H(15C) | 109.5 | C(19)-C(18)-H(18A)  | 119.8 |
| C(17)-C(18)-H(18A)  | 119.8 | C(18)-C(19)-H(19A)  | 119.6 |
| C(20)-C(19)-H(19A)  | 119.6 | C(21)-C(20)-H(20A)  | 119.2 |
| C(19)-C(20)-H(20A)  | 119.2 | C(24)-C(22)-H(22A)  | 108.9 |
| C(17)-C(22)-H(22A)  | 108.9 | C(23)-C(22)-H(22A)  | 108.9 |
| C(22)-C(23)-H(23A)  | 109.5 | C(22)-C(23)-H(23B)  | 109.5 |
| H(23A)-C(23)-H(23B) | 109.5 | C(22)-C(23)-H(23C)  | 109.5 |
| H(23A)-C(23)-H(23C) | 109.5 | H(23B)-C(23)-H(23C) | 109.5 |
| C(22)-C(24)-H(24A)  | 109.5 | C(22)-C(24)-H(24B)  | 109.5 |
| H(24A)-C(24)-H(24B) | 109.5 | C(22)-C(24)-H(24C)  | 109.5 |
| H(24A)-C(24)-H(24C) | 109.5 | H(24B)-C(24)-H(24C) | 109.5 |
| C(21)-C(25)-H(25A)  | 108.3 | C(26)-C(25)-H(25A)  | 108.3 |
| C(27)-C(25)-H(25A)  | 108.3 | C(25)-C(26)-H(26A)  | 109.5 |
| C(25)-C(26)-H(26B)  | 109.5 | H(26A)-C(26)-H(26B) | 109.5 |
| C(25)-C(26)-H(26C)  | 109.5 | H(26A)-C(26)-H(26C) | 109.5 |
| H(26B)-C(26)-H(26C) | 109.5 | C(25)-C(27)-H(27A)  | 109.5 |
| C(25)-C(27)-H(27B)  | 109.5 | H(27A)-C(27)-H(27B) | 109.5 |
| C(25)-C(27)-H(27C)  | 109.5 | H(27A)-C(27)-H(27C) | 109.5 |
| H(27B)-C(27)-H(27C) | 109.5 |                     |       |

Table S18. Torsion angles [°] for 2<sub>I</sub>-I<sub>3</sub>.

| atom-atom-atom-atom | angle  | atom-atom-atom-atom   | angle     |
|---------------------|--------|-----------------------|-----------|
| C(3)-N(2)-C(1)-N(1) | 1.0(7) | C(16)-N(2)-C(1)-N(1)  | 179.9(5)  |
|                     |        | C(3)-N(2)-C(1)-I(1)   | -175.5(4) |
|                     |        | C(16)-N(2)-C(1)-I(1)  | 3.4(8)    |
|                     |        | C(2)-N(1)-C(1)-N(2)   | -0.7(7)   |
|                     |        | C(4)-N(1)-C(1)-N(2)   | 176.9(5)  |
|                     |        | C(2)-N(1)-C(1)-I(1)   | 175.9(4)  |
|                     |        | C(4)-N(1)-C(1)-I(1)   | -6.5(8)   |
|                     |        | C(1)-N(1)-C(2)-C(3)   | 0.2(7)    |
|                     |        | C(4)-N(1)-C(2)-C(3)   | -177.5(5) |
|                     |        | N(1)-C(2)-C(3)-N(2)   | 0.4(7)    |
|                     |        | C(1)-N(2)-C(3)-C(2)   | -0.9(7)   |
|                     |        | C(16)-N(2)-C(3)-C(2)  | -179.8(5) |
|                     |        | C(1)-N(1)-C(4)-C(5)   | -90.8(7)  |
|                     |        | C(2)-N(1)-C(4)-C(5)   | 86.5(7)   |
|                     |        | C(1)-N(1)-C(4)-C(9)   | 93.2(7)   |
|                     |        | C(2)-N(1)-C(4)-C(9)   | -89.6(7)  |
|                     |        | C(9)-C(4)-C(5)-C(6)   | 1.4(9)    |
|                     |        | N(1)-C(4)-C(5)-C(6)   | -174.3(5) |
|                     |        | C(9)-C(4)-C(5)-C(10)  | -179.0(6) |
|                     |        | N(1)-C(4)-C(5)-C(10)  | 5.3(9)    |
|                     |        | C(4)-C(5)-C(6)-C(7)   | 0.0(9)    |
|                     |        | C(10)-C(5)-C(6)-C(7)  | -179.6(6) |
|                     |        | C(5)-C(6)-C(7)-C(8)   | -1.8(10)  |
|                     |        | C(6)-C(7)-C(8)-C(9)   | 2.3(10)   |
|                     |        | C(7)-C(8)-C(9)-C(4)   | -0.9(9)   |
|                     |        | C(7)-C(8)-C(9)-C(13)  | -178.2(6) |
|                     |        | C(5)-C(4)-C(9)-C(8)   | -0.9(9)   |
|                     |        | N(1)-C(4)-C(9)-C(8)   | 174.8(5)  |
|                     |        | C(5)-C(4)-C(9)-C(13)  | 176.2(6)  |
|                     |        | N(1)-C(4)-C(9)-C(13)  | -8.0(9)   |
|                     |        | C(4)-C(5)-C(10)-C(12) | -112.0(7) |
|                     |        | C(6)-C(5)-C(10)-C(12) | 67.6(8)   |
|                     |        | C(4)-C(5)-C(10)-C(11) | 124.3(7)  |
|                     |        | C(6)-C(5)-C(10)-C(11) | -56.1(8)  |
|                     |        | C(8)-C(9)-C(13)-C(14) | -61.5(8)  |
|                     |        | C(4)-C(9)-C(13)-C(14) | 121.5(7)  |
|                     |        | C(8)-C(9)-C(13)-C(15) | 61.5(8)   |
|                     |        | C(4)-C(9)-C(13)-C(15) | -115.6(7) |
|                     |        | C(1)-N(2)-C(16)-C(17) | -96.2(7)  |
|                     |        | C(3)-N(2)-C(16)-C(17) | 82.5(7)   |
|                     |        | C(1)-N(2)-C(16)-C(21) | 86.0(7)   |
|                     |        | C(3)-N(2)-C(16)-C(21) | -95.3(7)  |

|                         |           |
|-------------------------|-----------|
| C(21)-C(16)-C(17)-C(18) | 0.2(9)    |
| N(2)-C(16)-C(17)-C(18)  | -177.4(5) |
| C(21)-C(16)-C(17)-C(22) | -177.7(5) |
| N(2)-C(16)-C(17)-C(22)  | 4.6(8)    |
| C(16)-C(17)-C(18)-C(19) | 0.5(9)    |
| C(22)-C(17)-C(18)-C(19) | 178.6(6)  |
| C(17)-C(18)-C(19)-C(20) | -1.6(9)   |
| C(18)-C(19)-C(20)-C(21) | 2.0(10)   |
| C(19)-C(20)-C(21)-C(16) | -1.1(9)   |
| C(19)-C(20)-C(21)-C(25) | 176.6(5)  |
| C(17)-C(16)-C(21)-C(20) | 0.1(9)    |
| N(2)-C(16)-C(21)-C(20)  | 177.7(5)  |
| C(17)-C(16)-C(21)-C(25) | -177.7(5) |
| N(2)-C(16)-C(21)-C(25)  | 0.0(8)    |
| C(16)-C(17)-C(22)-C(24) | -120.2(6) |
| C(18)-C(17)-C(22)-C(24) | 61.9(8)   |
| C(16)-C(17)-C(22)-C(23) | 118.0(6)  |
| C(18)-C(17)-C(22)-C(23) | -59.9(7)  |
| C(20)-C(21)-C(25)-C(26) | -92.7(7)  |
| C(16)-C(21)-C(25)-C(26) | 84.9(7)   |
| C(20)-C(21)-C(25)-C(27) | 29.5(8)   |
| C(16)-C(21)-C(25)-C(27) | -152.9(6) |

Figure S4. Crystal structure for IPrCu(CF<sub>3</sub>SO<sub>3</sub>).

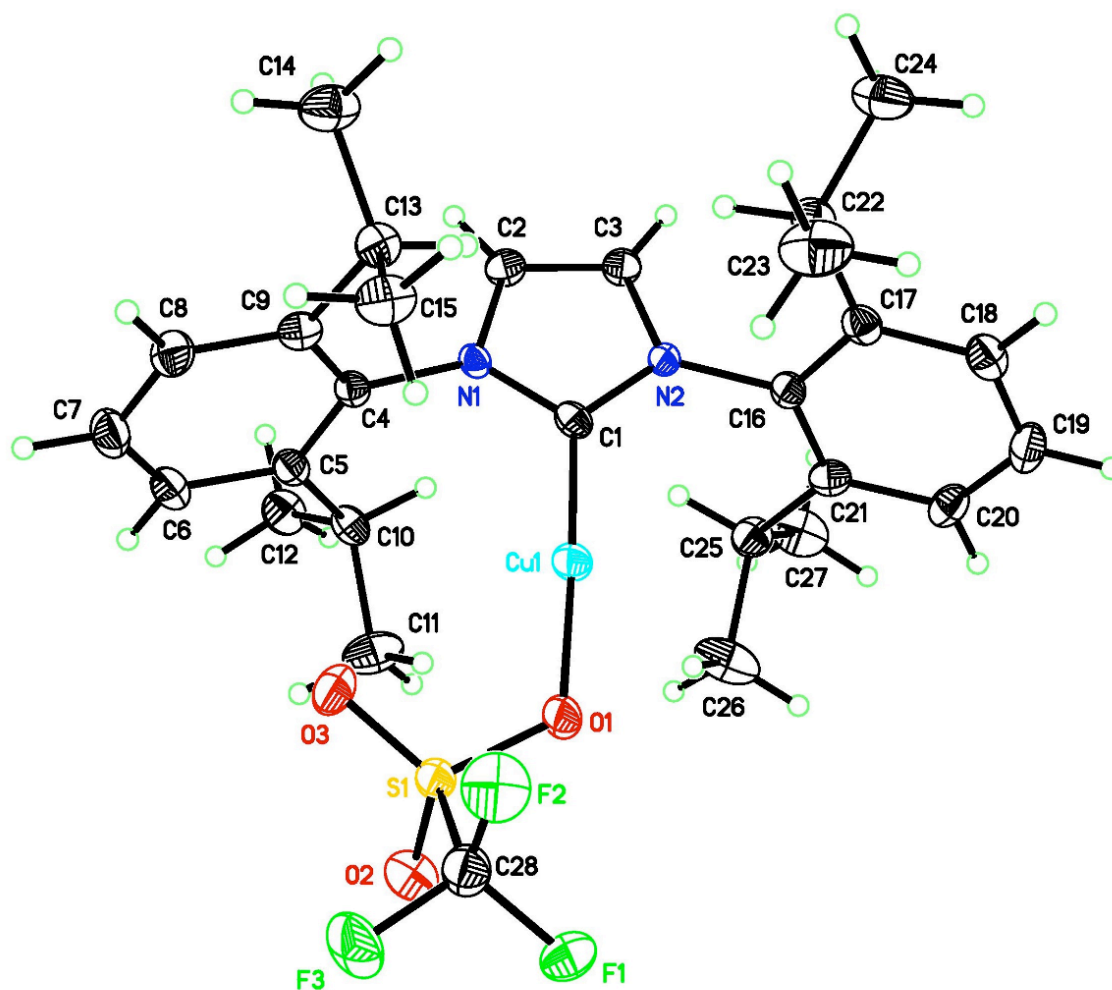

Table S19. Crystal data and structure refinement for IPrCu(CF<sub>3</sub>SO<sub>3</sub>).

|                                        |                                                                                                                           |
|----------------------------------------|---------------------------------------------------------------------------------------------------------------------------|
| Empirical formula                      | C <sub>28</sub> H <sub>36</sub> CuF <sub>3</sub> N <sub>2</sub> O <sub>3</sub> S                                          |
| Formula weight                         | 601.19                                                                                                                    |
| Temperature                            | 100(2) K                                                                                                                  |
| Wavelength                             | 0.71073 Å                                                                                                                 |
| Crystal system                         | orthorhombic                                                                                                              |
| Space group                            | P2 <sub>1</sub> 2 <sub>1</sub> 2 <sub>1</sub>                                                                             |
| Unit cell dimensions                   | $a = 10.4856(4)$ Å $\alpha = 90^\circ$<br>$b = 14.0928(5)$ Å $\beta = 90^\circ$<br>$c = 20.2195(7)$ Å $\gamma = 90^\circ$ |
| Volume                                 | 2987.87(19) Å <sup>3</sup>                                                                                                |
| Z                                      | 4                                                                                                                         |
| Density (calculated)                   | 1.336 g.cm <sup>-3</sup>                                                                                                  |
| Absorption coefficient ( $\mu$ )       | 0.850 mm <sup>-1</sup>                                                                                                    |
| F(000)                                 | 1256                                                                                                                      |
| Crystal size                           | 0.27 × 0.15 × 0.10 mm <sup>3</sup>                                                                                        |
| $\theta$ range for data collection     | 1.76 to 28.11°                                                                                                            |
| Index ranges                           | -13 ≤ h ≤ 13, -18 ≤ k ≤ 18, -26 ≤ l ≤ 26                                                                                  |
| Reflections collected                  | 50329                                                                                                                     |
| Independent reflections                | 7256 [R <sub>int</sub> = 0.0530]                                                                                          |
| Completeness to $\theta = 28.11^\circ$ | 99.6 %                                                                                                                    |
| Absorption correction                  | Empirical                                                                                                                 |
| Max. and min. transmission             | 0.9198 and 0.8030                                                                                                         |
| Refinement method                      | Full-matrix least-squares on F <sup>2</sup>                                                                               |
| Data / restraints / parameters         | 7256 / 0 / 351                                                                                                            |
| Goodness-of-fit on F <sup>2</sup>      | 1.070                                                                                                                     |
| Final R indices [I > 2σ(I)]            | R <sub>1</sub> = 0.0333, wR <sub>2</sub> = 0.0689                                                                         |
| R indices (all data)                   | R <sub>1</sub> = 0.0426, wR <sub>2</sub> = 0.0721                                                                         |
| Absolute structure parameter           | -0.004(8)                                                                                                                 |
| Largest diff. peak and hole            | 0.270 and -0.325 e <sup>-</sup> .Å <sup>-3</sup>                                                                          |

Table S20. Atomic coordinates and equivalent isotropic displacement parameters ( $\text{\AA}^2$ ) for IPrCu(CF<sub>3</sub>SO<sub>3</sub>). U(eq) is defined as one third of the trace of the orthogonalized U<sub>ij</sub> tensor.

|       | x           | y           | z           | U(eq)    |
|-------|-------------|-------------|-------------|----------|
| Cu(1) | 0.60443(2)  | 0.53807(2)  | 0.97853(1)  | 0.019(1) |
| S(1)  | 0.64954(5)  | 0.44091(4)  | 1.10440(2)  | 0.020(1) |
| F(1)  | 0.58311(13) | 0.52828(10) | 1.21322(6)  | 0.034(1) |
| F(2)  | 0.43102(12) | 0.45148(10) | 1.16630(7)  | 0.039(1) |
| F(3)  | 0.57766(15) | 0.37566(10) | 1.21889(6)  | 0.040(1) |
| O(1)  | 0.61260(15) | 0.53069(10) | 1.07105(6)  | 0.025(1) |
| O(2)  | 0.77868(14) | 0.44183(12) | 1.12738(7)  | 0.029(1) |
| O(3)  | 0.60488(18) | 0.35790(11) | 1.07163(7)  | 0.030(1) |
| N(1)  | 0.62754(14) | 0.46433(12) | 0.84724(8)  | 0.014(1) |
| N(2)  | 0.59181(16) | 0.61351(12) | 0.84298(8)  | 0.015(1) |
| C(1)  | 0.60625(19) | 0.54080(15) | 0.88623(9)  | 0.017(1) |
| C(2)  | 0.6254(2)   | 0.48859(15) | 0.78086(10) | 0.020(1) |
| C(3)  | 0.6034(2)   | 0.58216(15) | 0.77803(9)  | 0.020(1) |
| C(4)  | 0.64160(19) | 0.36806(15) | 0.87136(9)  | 0.016(1) |
| C(5)  | 0.76456(19) | 0.33505(15) | 0.88546(10) | 0.018(1) |
| C(6)  | 0.7751(2)   | 0.24000(16) | 0.90531(11) | 0.023(1) |
| C(7)  | 0.6681(2)   | 0.18361(17) | 0.91038(11) | 0.026(1) |
| C(8)  | 0.5477(2)   | 0.21896(16) | 0.89710(11) | 0.024(1) |
| C(9)  | 0.53177(19) | 0.31340(16) | 0.87801(10) | 0.019(1) |
| C(10) | 0.8807(2)   | 0.39832(16) | 0.88097(10) | 0.022(1) |
| C(11) | 0.9271(2)   | 0.42632(19) | 0.95032(11) | 0.035(1) |
| C(12) | 0.9889(2)   | 0.35330(17) | 0.84153(12) | 0.028(1) |
| C(13) | 0.3998(2)   | 0.35542(16) | 0.86664(10) | 0.022(1) |
| C(14) | 0.3314(2)   | 0.30715(19) | 0.80982(11) | 0.033(1) |
| C(15) | 0.3225(2)   | 0.35237(18) | 0.93067(11) | 0.030(1) |
| C(16) | 0.5671(2)   | 0.71007(15) | 0.86232(9)  | 0.017(1) |
| C(17) | 0.4404(2)   | 0.74196(16) | 0.86033(10) | 0.020(1) |
| C(18) | 0.4186(2)   | 0.83625(16) | 0.87935(10) | 0.023(1) |
| C(19) | 0.5180(2)   | 0.89401(17) | 0.89877(11) | 0.026(1) |
| C(20) | 0.6420(2)   | 0.85990(16) | 0.89986(11) | 0.023(1) |
| C(21) | 0.6697(2)   | 0.76706(16) | 0.88122(10) | 0.020(1) |
| C(22) | 0.3310(2)   | 0.67928(16) | 0.83813(11) | 0.023(1) |
| C(23) | 0.2398(2)   | 0.6567(2)   | 0.89499(13) | 0.041(1) |
| C(24) | 0.2586(2)   | 0.72246(19) | 0.78014(12) | 0.036(1) |
| C(25) | 0.8060(2)   | 0.73017(17) | 0.88126(11) | 0.023(1) |
| C(26) | 0.8554(2)   | 0.7149(2)   | 0.95169(12) | 0.041(1) |
| C(27) | 0.8967(2)   | 0.79498(19) | 0.84348(12) | 0.036(1) |
| C(28) | 0.5542(2)   | 0.45021(17) | 1.17944(11) | 0.026(1) |
| H(2A) | 0.6373      | 0.4470      | 0.7444      | 0.024    |
| H(3A) | 0.5969      | 0.6198      | 0.7392      | 0.023    |



|        |        |        |        |       |
|--------|--------|--------|--------|-------|
| H(6A)  | 0.8565 | 0.2143 | 0.9153 | 0.028 |
| H(7A)  | 0.6773 | 0.1191 | 0.9233 | 0.032 |
| H(8A)  | 0.4754 | 0.1787 | 0.9010 | 0.029 |
| H(10A) | 0.8547 | 0.4578 | 0.8576 | 0.026 |
| H(11A) | 0.8580 | 0.4581 | 0.9742 | 0.052 |
| H(11B) | 1.0001 | 0.4694 | 0.9464 | 0.052 |
| H(11C) | 0.9530 | 0.3693 | 0.9746 | 0.052 |
| H(12A) | 0.9560 | 0.3306 | 0.7990 | 0.041 |
| H(12B) | 1.0243 | 0.2998 | 0.8664 | 0.041 |
| H(12C) | 1.0558 | 0.4006 | 0.8338 | 0.041 |
| H(13A) | 0.4114 | 0.4236 | 0.8544 | 0.026 |
| H(14A) | 0.3864 | 0.3072 | 0.7706 | 0.049 |
| H(14B) | 0.2523 | 0.3415 | 0.8000 | 0.049 |
| H(14C) | 0.3111 | 0.2416 | 0.8221 | 0.049 |
| H(15A) | 0.3716 | 0.3819 | 0.9664 | 0.045 |
| H(15B) | 0.3040 | 0.2862 | 0.9422 | 0.045 |
| H(15C) | 0.2423 | 0.3870 | 0.9245 | 0.045 |
| H(18A) | 0.3342 | 0.8607 | 0.8788 | 0.028 |
| H(19A) | 0.5013 | 0.9577 | 0.9115 | 0.032 |
| H(20A) | 0.7092 | 0.9006 | 0.9136 | 0.028 |
| H(22A) | 0.3684 | 0.6179 | 0.8227 | 0.028 |
| H(23A) | 0.2865 | 0.6243 | 0.9304 | 0.062 |
| H(23B) | 0.1712 | 0.6155 | 0.8789 | 0.062 |
| H(23C) | 0.2032 | 0.7157 | 0.9121 | 0.062 |
| H(24A) | 0.3173 | 0.7325 | 0.7431 | 0.054 |
| H(24B) | 0.2217 | 0.7834 | 0.7936 | 0.054 |
| H(24C) | 0.1903 | 0.6793 | 0.7665 | 0.054 |
| H(25A) | 0.8060 | 0.6671 | 0.8585 | 0.028 |
| H(26A) | 0.9403 | 0.6860 | 0.9500 | 0.061 |
| H(26B) | 0.7970 | 0.6728 | 0.9756 | 0.061 |
| H(26C) | 0.8604 | 0.7761 | 0.9746 | 0.061 |
| H(27A) | 0.8635 | 0.8056 | 0.7988 | 0.054 |
| H(27B) | 0.9809 | 0.7651 | 0.8408 | 0.054 |
| H(27C) | 0.9038 | 0.8559 | 0.8666 | 0.054 |

Table S21. Anisotropic displacement parameters ( $\text{\AA}^2$ ) for IPrCu(CF<sub>3</sub>SO<sub>3</sub>).

The anisotropic displacement factor exponent takes the form:

$$-2\pi^2[h^2 a^{*2}U_{11} + \dots + 2hka^*b^*U_{12}]$$

|       | U <sub>11</sub> | U <sub>22</sub> | U <sub>33</sub> | U <sub>23</sub> | U <sub>13</sub> | U <sub>12</sub> |
|-------|-----------------|-----------------|-----------------|-----------------|-----------------|-----------------|
| Cu(1) | 0.0248(1)       | 0.0198(1)       | 0.0137(1)       | 0.0012(1)       | 0.0001(1)       | 0.0021(1)       |
| S(1)  | 0.0253(3)       | 0.0179(3)       | 0.0162(2)       | 0.0012(2)       | 0.0005(2)       | 0.0005(2)       |
| F(1)  | 0.0467(9)       | 0.0336(8)       | 0.0204(6)       | -0.0073(6)      | 0.0010(6)       | 0.0046(7)       |
| F(2)  | 0.0255(7)       | 0.0458(9)       | 0.0454(8)       | 0.0009(8)       | 0.0071(6)       | -0.0029(7)      |
| F(3)  | 0.0578(10)      | 0.0336(8)       | 0.0277(7)       | 0.0143(7)       | 0.0101(7)       | 0.0053(8)       |
| O(1)  | 0.0418(9)       | 0.0179(8)       | 0.0140(7)       | 0.0028(6)       | 0.0008(7)       | 0.0047(9)       |
| O(2)  | 0.0224(8)       | 0.0346(10)      | 0.0290(9)       | 0.0048(8)       | 0.0013(7)       | 0.0006(7)       |
| O(3)  | 0.0447(10)      | 0.0195(8)       | 0.0267(8)       | -0.0057(7)      | -0.0017(8)      | -0.0002(8)      |
| N(1)  | 0.0169(9)       | 0.0136(9)       | 0.0129(7)       | 0.0027(7)       | 0.0004(6)       | 0.0008(8)       |
| N(2)  | 0.0198(9)       | 0.0129(9)       | 0.0125(8)       | 0.0005(7)       | -0.0011(7)      | 0.0007(8)       |
| C(1)  | 0.0127(9)       | 0.0190(11)      | 0.0182(9)       | 0.0030(9)       | -0.0001(8)      | 0.0013(10)      |
| C(2)  | 0.0245(12)      | 0.0226(12)      | 0.0125(9)       | -0.0014(9)      | 0.0024(9)       | 0.0015(9)       |
| C(3)  | 0.0264(11)      | 0.0198(11)      | 0.0124(9)       | 0.0009(8)       | 0.0013(9)       | 0.0009(10)      |
| C(4)  | 0.0192(11)      | 0.0164(11)      | 0.0125(9)       | 0.0009(8)       | 0.0016(8)       | 0.0016(9)       |
| C(5)  | 0.0190(11)      | 0.0187(12)      | 0.0161(10)      | 0.0007(9)       | 0.0001(8)       | 0.0034(9)       |
| C(6)  | 0.0259(12)      | 0.0220(12)      | 0.0217(11)      | 0.0052(10)      | -0.0007(9)      | 0.0038(10)      |
| C(7)  | 0.0344(14)      | 0.0201(12)      | 0.0251(12)      | 0.0056(10)      | 0.0010(10)      | 0.0024(11)      |
| C(8)  | 0.0281(12)      | 0.0210(12)      | 0.0236(12)      | 0.0036(10)      | 0.0007(10)      | -0.0065(10)     |
| C(9)  | 0.0171(11)      | 0.0232(13)      | 0.0157(10)      | -0.0011(9)      | 0.0015(8)       | -0.0012(9)      |
| C(10) | 0.0181(11)      | 0.0228(12)      | 0.0238(11)      | 0.0036(9)       | -0.0007(9)      | 0.0043(10)      |
| C(11) | 0.0240(13)      | 0.0502(17)      | 0.0296(12)      | -0.0097(12)     | -0.0009(10)     | -0.0080(12)     |
| C(12) | 0.0211(11)      | 0.0311(14)      | 0.0305(13)      | 0.0011(11)      | 0.0028(10)      | 0.0045(10)      |
| C(13) | 0.0170(10)      | 0.0242(12)      | 0.0232(11)      | -0.0010(9)      | 0.0021(9)       | 0.0010(10)      |
| C(14) | 0.0261(13)      | 0.0452(16)      | 0.0270(13)      | -0.0115(12)     | -0.0014(10)     | 0.0070(12)      |
| C(15) | 0.0227(12)      | 0.0401(15)      | 0.0266(12)      | -0.0052(11)     | 0.0024(10)      | 0.0003(11)      |
| C(16) | 0.0235(11)      | 0.0148(11)      | 0.0133(10)      | 0.0031(8)       | 0.0006(8)       | 0.0000(9)       |
| C(17) | 0.0221(11)      | 0.0209(12)      | 0.0154(10)      | 0.0033(9)       | 0.0012(8)       | 0.0021(9)       |
| C(18) | 0.0241(12)      | 0.0239(13)      | 0.0222(11)      | 0.0037(9)       | 0.0023(9)       | 0.0045(10)      |
| C(19) | 0.0382(14)      | 0.0169(12)      | 0.0243(12)      | -0.0016(10)     | 0.0052(11)      | 0.0030(10)      |
| C(20) | 0.0289(12)      | 0.0184(12)      | 0.0229(11)      | -0.0029(10)     | 0.0018(10)      | -0.0053(9)      |
| C(21) | 0.0198(11)      | 0.0233(13)      | 0.0164(10)      | 0.0007(9)       | 0.0009(9)       | -0.0019(10)     |
| C(22) | 0.0192(12)      | 0.0238(13)      | 0.0276(12)      | 0.0004(10)      | -0.0041(9)      | 0.0001(10)      |
| C(23) | 0.0354(15)      | 0.0515(18)      | 0.0368(15)      | 0.0062(14)      | -0.0008(12)     | -0.0181(13)     |
| C(24) | 0.0307(14)      | 0.0429(16)      | 0.0334(14)      | 0.0047(13)      | -0.0101(11)     | -0.0046(12)     |
| C(25) | 0.0189(11)      | 0.0250(13)      | 0.0262(12)      | -0.0027(10)     | -0.0004(9)      | -0.0002(10)     |
| C(26) | 0.0271(13)      | 0.063(2)        | 0.0319(13)      | 0.0122(13)      | -0.0036(11)     | 0.0024(13)      |
| C(27) | 0.0239(12)      | 0.0500(17)      | 0.0336(13)      | 0.0060(12)      | 0.0045(12)      | -0.0029(13)     |
| C(28) | 0.0305(12)      | 0.0241(13)      | 0.0245(11)      | 0.0005(10)      | 0.0025(9)       | 0.0009(11)      |

Table S22. Bond lengths [ $\text{\AA}$ ] for  $\text{IPrCu}(\text{CF}_3\text{SO}_3)$ .

| atom-atom    | distance   | atom-atom    | distance   |
|--------------|------------|--------------|------------|
| Cu(1)-C(1)   | 1.8669(19) | Cu(1)-O(1)   | 1.8754(13) |
| S(1)-O(3)    | 1.4235(16) | S(1)-O(2)    | 1.4317(16) |
| S(1)-O(1)    | 1.4852(15) | S(1)-C(28)   | 1.822(2)   |
| F(1)-C(28)   | 1.330(3)   | F(2)-C(28)   | 1.319(3)   |
| F(3)-C(28)   | 1.342(3)   | N(1)-C(1)    | 1.354(3)   |
| N(1)-C(2)    | 1.385(2)   | N(1)-C(4)    | 1.449(3)   |
| N(2)-C(1)    | 1.355(2)   | N(2)-C(3)    | 1.391(2)   |
| N(2)-C(16)   | 1.439(3)   | C(2)-C(3)    | 1.340(3)   |
| C(4)-C(9)    | 1.392(3)   | C(4)-C(5)    | 1.400(3)   |
| C(5)-C(6)    | 1.403(3)   | C(5)-C(10)   | 1.512(3)   |
| C(6)-C(7)    | 1.378(3)   | C(7)-C(8)    | 1.384(3)   |
| C(8)-C(9)    | 1.396(3)   | C(9)-C(13)   | 1.522(3)   |
| C(10)-C(12)  | 1.525(3)   | C(10)-C(11)  | 1.536(3)   |
| C(13)-C(14)  | 1.516(3)   | C(13)-C(15)  | 1.528(3)   |
| C(16)-C(21)  | 1.395(3)   | C(16)-C(17)  | 1.404(3)   |
| C(17)-C(18)  | 1.402(3)   | C(17)-C(22)  | 1.516(3)   |
| C(18)-C(19)  | 1.379(3)   | C(19)-C(20)  | 1.386(3)   |
| C(20)-C(21)  | 1.392(3)   | C(21)-C(25)  | 1.522(3)   |
| C(22)-C(24)  | 1.524(3)   | C(22)-C(23)  | 1.529(3)   |
| C(25)-C(27)  | 1.523(3)   | C(25)-C(26)  | 1.530(3)   |
| C(2)-H(2A)   | 0.9500     | C(3)-H(3A)   | 0.9500     |
| C(6)-H(6A)   | 0.9500     | C(7)-H(7A)   | 0.9500     |
| C(8)-H(8A)   | 0.9500     | C(10)-H(10A) | 1.0000     |
| C(11)-H(11A) | 0.9800     | C(11)-H(11B) | 0.9800     |
| C(11)-H(11C) | 0.9800     | C(12)-H(12A) | 0.9800     |
| C(12)-H(12B) | 0.9800     | C(12)-H(12C) | 0.9800     |
| C(13)-H(13A) | 1.0000     | C(14)-H(14A) | 0.9800     |
| C(14)-H(14B) | 0.9800     | C(14)-H(14C) | 0.9800     |
| C(15)-H(15A) | 0.9800     | C(15)-H(15B) | 0.9800     |
| C(15)-H(15C) | 0.9800     | C(18)-H(18A) | 0.9500     |
| C(19)-H(19A) | 0.9500     | C(20)-H(20A) | 0.9500     |
| C(22)-H(22A) | 1.0000     | C(23)-H(23A) | 0.9800     |
| C(23)-H(23B) | 0.9800     | C(23)-H(23C) | 0.9800     |
| C(24)-H(24A) | 0.9800     | C(24)-H(24B) | 0.9800     |
| C(24)-H(24C) | 0.9800     | C(25)-H(25A) | 1.0000     |
| C(26)-H(26A) | 0.9800     | C(26)-H(26B) | 0.9800     |
| C(26)-H(26C) | 0.9800     | C(27)-H(27A) | 0.9800     |
| C(27)-H(27B) | 0.9800     | C(27)-H(27C) | 0.9800     |

Table 23. Bond angles [°] for IPrCu(CF<sub>3</sub>SO<sub>3</sub>).

| atom-atom-atom      | angle      | atom-atom-atom      | angle      |
|---------------------|------------|---------------------|------------|
| C(1)-Cu(1)-O(1)     | 176.22(8)  | O(3)-S(1)-O(2)      | 118.01(11) |
| O(3)-S(1)-O(1)      | 113.76(9)  | O(2)-S(1)-O(1)      | 112.72(10) |
| O(3)-S(1)-C(28)     | 105.44(11) | O(2)-S(1)-C(28)     | 104.37(10) |
| O(1)-S(1)-C(28)     | 100.00(10) | S(1)-O(1)-Cu(1)     | 120.80(9)  |
| C(1)-N(1)-C(2)      | 111.41(17) | C(1)-N(1)-C(4)      | 124.47(16) |
| C(2)-N(1)-C(4)      | 123.97(17) | C(1)-N(2)-C(3)      | 111.05(17) |
| C(1)-N(2)-C(16)     | 124.03(16) | C(3)-N(2)-C(16)     | 124.92(16) |
| N(1)-C(1)-N(2)      | 104.16(16) | N(1)-C(1)-Cu(1)     | 124.57(14) |
| N(2)-C(1)-Cu(1)     | 131.24(16) | C(3)-C(2)-N(1)      | 106.68(18) |
| C(2)-C(3)-N(2)      | 106.69(18) | C(9)-C(4)-C(5)      | 123.9(2)   |
| C(9)-C(4)-N(1)      | 117.80(18) | C(5)-C(4)-N(1)      | 118.25(18) |
| C(4)-C(5)-C(6)      | 116.6(2)   | C(4)-C(5)-C(10)     | 122.24(19) |
| C(6)-C(5)-C(10)     | 121.14(19) | C(7)-C(6)-C(5)      | 120.5(2)   |
| C(6)-C(7)-C(8)      | 121.4(2)   | C(7)-C(8)-C(9)      | 120.4(2)   |
| C(4)-C(9)-C(8)      | 117.1(2)   | C(4)-C(9)-C(13)     | 121.5(2)   |
| C(8)-C(9)-C(13)     | 121.4(2)   | C(5)-C(10)-C(12)    | 112.65(18) |
| C(5)-C(10)-C(11)    | 110.62(18) | C(12)-C(10)-C(11)   | 110.38(18) |
| C(14)-C(13)-C(9)    | 111.73(18) | C(14)-C(13)-C(15)   | 112.22(19) |
| C(9)-C(13)-C(15)    | 110.09(18) | C(21)-C(16)-C(17)   | 123.6(2)   |
| C(21)-C(16)-N(2)    | 118.69(19) | C(17)-C(16)-N(2)    | 117.72(19) |
| C(18)-C(17)-C(16)   | 116.7(2)   | C(18)-C(17)-C(22)   | 120.67(19) |
| C(16)-C(17)-C(22)   | 122.6(2)   | C(19)-C(18)-C(17)   | 120.9(2)   |
| C(18)-C(19)-C(20)   | 120.6(2)   | C(19)-C(20)-C(21)   | 121.1(2)   |
| C(20)-C(21)-C(16)   | 117.0(2)   | C(20)-C(21)-C(25)   | 121.1(2)   |
| C(16)-C(21)-C(25)   | 121.8(2)   | C(17)-C(22)-C(24)   | 111.85(19) |
| C(17)-C(22)-C(23)   | 111.84(19) | C(24)-C(22)-C(23)   | 110.52(19) |
| C(21)-C(25)-C(27)   | 112.41(19) | C(21)-C(25)-C(26)   | 111.49(19) |
| C(27)-C(25)-C(26)   | 109.9(2)   | F(2)-C(28)-F(1)     | 108.40(19) |
| F(2)-C(28)-F(3)     | 108.07(19) | F(1)-C(28)-F(3)     | 107.49(17) |
| F(2)-C(28)-S(1)     | 111.75(15) | F(1)-C(28)-S(1)     | 111.22(16) |
| F(3)-C(28)-S(1)     | 109.75(15) | C(3)-C(2)-H(2A)     | 126.7      |
| N(1)-C(2)-H(2A)     | 126.7      | C(2)-C(3)-H(3A)     | 126.7      |
| N(2)-C(3)-H(3A)     | 126.7      | C(7)-C(6)-H(6A)     | 119.7      |
| C(5)-C(6)-H(6A)     | 119.7      | C(6)-C(7)-H(7A)     | 119.3      |
| C(8)-C(7)-H(7A)     | 119.3      | C(7)-C(8)-H(8A)     | 119.8      |
| C(9)-C(8)-H(8A)     | 119.8      | C(5)-C(10)-H(10A)   | 107.7      |
| C(12)-C(10)-H(10A)  | 107.7      | C(11)-C(10)-H(10A)  | 107.7      |
| C(10)-C(11)-H(11A)  | 109.5      | C(10)-C(11)-H(11B)  | 109.5      |
| H(11A)-C(11)-H(11B) | 109.5      | C(10)-C(11)-H(11C)  | 109.5      |
| H(11A)-C(11)-H(11C) | 109.5      | H(11B)-C(11)-H(11C) | 109.5      |
| C(10)-C(12)-H(12A)  | 109.5      | C(10)-C(12)-H(12B)  | 109.5      |
| H(12A)-C(12)-H(12B) | 109.5      | C(10)-C(12)-H(12C)  | 109.5      |

|                     |       |                     |       |
|---------------------|-------|---------------------|-------|
| H(12A)-C(12)-H(12C) | 109.5 | H(12B)-C(12)-H(12C) | 109.5 |
| C(14)-C(13)-H(13A)  | 107.5 | C(9)-C(13)-H(13A)   | 107.5 |
| C(15)-C(13)-H(13A)  | 107.5 | C(13)-C(14)-H(14A)  | 109.5 |
| C(13)-C(14)-H(14B)  | 109.5 | H(14A)-C(14)-H(14B) | 109.5 |
| C(13)-C(14)-H(14C)  | 109.5 | H(14A)-C(14)-H(14C) | 109.5 |
| H(14B)-C(14)-H(14C) | 109.5 | C(13)-C(15)-H(15A)  | 109.5 |
| C(13)-C(15)-H(15B)  | 109.5 | H(15A)-C(15)-H(15B) | 109.5 |
| C(13)-C(15)-H(15C)  | 109.5 | H(15A)-C(15)-H(15C) | 109.5 |
| H(15B)-C(15)-H(15C) | 109.5 | C(19)-C(18)-H(18A)  | 119.5 |
| C(17)-C(18)-H(18A)  | 119.5 | C(18)-C(19)-H(19A)  | 119.7 |
| C(20)-C(19)-H(19A)  | 119.7 | C(19)-C(20)-H(20A)  | 119.4 |
| C(21)-C(20)-H(20A)  | 119.4 | C(17)-C(22)-H(22A)  | 107.5 |
| C(24)-C(22)-H(22A)  | 107.5 | C(23)-C(22)-H(22A)  | 107.5 |
| C(22)-C(23)-H(23A)  | 109.5 | C(22)-C(23)-H(23B)  | 109.5 |
| H(23A)-C(23)-H(23B) | 109.5 | C(22)-C(23)-H(23C)  | 109.5 |
| H(23A)-C(23)-H(23C) | 109.5 | H(23B)-C(23)-H(23C) | 109.5 |
| C(22)-C(24)-H(24A)  | 109.5 | C(22)-C(24)-H(24B)  | 109.5 |
| H(24A)-C(24)-H(24B) | 109.5 | C(22)-C(24)-H(24C)  | 109.5 |
| H(24A)-C(24)-H(24C) | 109.5 | H(24B)-C(24)-H(24C) | 109.5 |
| C(21)-C(25)-H(25A)  | 107.6 | C(27)-C(25)-H(25A)  | 107.6 |
| C(26)-C(25)-H(25A)  | 107.6 | C(25)-C(26)-H(26A)  | 109.5 |
| C(25)-C(26)-H(26B)  | 109.5 | H(26A)-C(26)-H(26B) | 109.5 |
| C(25)-C(26)-H(26C)  | 109.5 | H(26A)-C(26)-H(26C) | 109.5 |
| H(26B)-C(26)-H(26C) | 109.5 | C(25)-C(27)-H(27A)  | 109.5 |
| C(25)-C(27)-H(27B)  | 109.5 | H(27A)-C(27)-H(27B) | 109.5 |
| C(25)-C(27)-H(27C)  | 109.5 | H(27A)-C(27)-H(27C) | 109.5 |
| H(27B)-C(27)-H(27C) | 109.5 |                     |       |

Table S24. Torsion angles [°] for IPrCu(CF<sub>3</sub>SO<sub>3</sub>)<sub>2</sub>.

| atom-atom-atom-atom  | angle      | atom-atom-atom-atom   | angle       |
|----------------------|------------|-----------------------|-------------|
| O(3)-S(1)-O(1)-Cu(1) | -35.50(14) | O(2)-S(1)-O(1)-Cu(1)  | 102.29(12)  |
|                      |            | C(28)-S(1)-O(1)-Cu(1) | -147.41(12) |
|                      |            | C(1)-Cu(1)-O(1)-S(1)  | -41.9(13)   |
|                      |            | C(2)-N(1)-C(1)-N(2)   | -0.5(2)     |
|                      |            | C(4)-N(1)-C(1)-N(2)   | -176.31(17) |
|                      |            | C(2)-N(1)-C(1)-Cu(1)  | -178.88(15) |
|                      |            | C(4)-N(1)-C(1)-Cu(1)  | 5.3(3)      |
|                      |            | C(3)-N(2)-C(1)-N(1)   | 0.3(2)      |
|                      |            | C(16)-N(2)-C(1)-N(1)  | -179.98(18) |
|                      |            | C(3)-N(2)-C(1)-Cu(1)  | 178.56(16)  |
|                      |            | C(16)-N(2)-C(1)-Cu(1) | -1.7(3)     |
|                      |            | O(1)-Cu(1)-C(1)-N(1)  | 46.8(13)    |
|                      |            | O(1)-Cu(1)-C(1)-N(2)  | -131.1(11)  |
|                      |            | C(1)-N(1)-C(2)-C(3)   | 0.5(2)      |
|                      |            | C(4)-N(1)-C(2)-C(3)   | 176.33(19)  |
|                      |            | N(1)-C(2)-C(3)-N(2)   | -0.3(2)     |
|                      |            | C(1)-N(2)-C(3)-C(2)   | 0.0(3)      |
|                      |            | C(16)-N(2)-C(3)-C(2)  | -179.7(2)   |
|                      |            | C(1)-N(1)-C(4)-C(9)   | 88.7(2)     |
|                      |            | C(2)-N(1)-C(4)-C(9)   | -86.6(2)    |
|                      |            | C(1)-N(1)-C(4)-C(5)   | -92.4(2)    |
|                      |            | C(2)-N(1)-C(4)-C(5)   | 92.3(2)     |
|                      |            | C(9)-C(4)-C(5)-C(6)   | 2.1(3)      |
|                      |            | N(1)-C(4)-C(5)-C(6)   | -176.70(18) |
|                      |            | C(9)-C(4)-C(5)-C(10)  | -176.8(2)   |
|                      |            | N(1)-C(4)-C(5)-C(10)  | 4.4(3)      |
|                      |            | C(4)-C(5)-C(6)-C(7)   | -0.1(3)     |
|                      |            | C(10)-C(5)-C(6)-C(7)  | 178.8(2)    |
|                      |            | C(5)-C(6)-C(7)-C(8)   | -0.9(3)     |
|                      |            | C(6)-C(7)-C(8)-C(9)   | 0.1(3)      |
|                      |            | C(5)-C(4)-C(9)-C(8)   | -2.9(3)     |
|                      |            | N(1)-C(4)-C(9)-C(8)   | 175.88(18)  |
|                      |            | C(5)-C(4)-C(9)-C(13)  | 175.55(19)  |
|                      |            | N(1)-C(4)-C(9)-C(13)  | -5.6(3)     |
|                      |            | C(7)-C(8)-C(9)-C(4)   | 1.8(3)      |
|                      |            | C(7)-C(8)-C(9)-C(13)  | -176.7(2)   |
|                      |            | C(4)-C(5)-C(10)-C(12) | -130.9(2)   |
|                      |            | C(6)-C(5)-C(10)-C(12) | 50.2(3)     |
|                      |            | C(4)-C(5)-C(10)-C(11) | 105.0(2)    |
|                      |            | C(6)-C(5)-C(10)-C(11) | -73.8(3)    |
|                      |            | C(4)-C(9)-C(13)-C(14) | 118.1(2)    |
|                      |            | C(8)-C(9)-C(13)-C(14) | -63.4(3)    |

|                         |             |
|-------------------------|-------------|
| C(4)-C(9)-C(13)-C(15)   | -116.5(2)   |
| C(8)-C(9)-C(13)-C(15)   | 62.0(3)     |
| C(1)-N(2)-C(16)-C(21)   | 82.4(3)     |
| C(3)-N(2)-C(16)-C(21)   | -98.0(2)    |
| C(1)-N(2)-C(16)-C(17)   | -98.3(2)    |
| C(3)-N(2)-C(16)-C(17)   | 81.4(3)     |
| C(21)-C(16)-C(17)-C(18) | -0.7(3)     |
| N(2)-C(16)-C(17)-C(18)  | -179.97(17) |
| C(21)-C(16)-C(17)-C(22) | 178.6(2)    |
| N(2)-C(16)-C(17)-C(22)  | -0.7(3)     |
| C(16)-C(17)-C(18)-C(19) | 0.2(3)      |
| C(22)-C(17)-C(18)-C(19) | -179.1(2)   |
| C(17)-C(18)-C(19)-C(20) | 0.0(3)      |
| C(18)-C(19)-C(20)-C(21) | 0.3(3)      |
| C(19)-C(20)-C(21)-C(16) | -0.8(3)     |
| C(19)-C(20)-C(21)-C(25) | 178.9(2)    |
| C(17)-C(16)-C(21)-C(20) | 1.0(3)      |
| N(2)-C(16)-C(21)-C(20)  | -179.73(18) |
| C(17)-C(16)-C(21)-C(25) | -178.7(2)   |
| N(2)-C(16)-C(21)-C(25)  | 0.6(3)      |
| C(18)-C(17)-C(22)-C(24) | 56.7(3)     |
| C(16)-C(17)-C(22)-C(24) | -122.6(2)   |
| C(18)-C(17)-C(22)-C(23) | -67.9(3)    |
| C(16)-C(17)-C(22)-C(23) | 112.8(2)    |
| C(20)-C(21)-C(25)-C(27) | -51.3(3)    |
| C(16)-C(21)-C(25)-C(27) | 128.3(2)    |
| C(20)-C(21)-C(25)-C(26) | 72.6(3)     |
| C(16)-C(21)-C(25)-C(26) | -107.8(2)   |
| O(3)-S(1)-C(28)-F(2)    | -55.78(19)  |
| O(2)-S(1)-C(28)-F(2)    | 179.21(16)  |
| O(1)-S(1)-C(28)-F(2)    | 62.46(18)   |
| O(3)-S(1)-C(28)-F(1)    | -177.09(15) |
| O(2)-S(1)-C(28)-F(1)    | 57.90(18)   |
| O(1)-S(1)-C(28)-F(1)    | -58.84(17)  |
| O(3)-S(1)-C(28)-F(3)    | 64.10(18)   |
| O(2)-S(1)-C(28)-F(3)    | -60.91(18)  |
| O(1)-S(1)-C(28)-F(3)    | -177.66(16) |

**Computational Methods.** All computations were performed using the Gaussian03 software package. All Cu(I) and Cu(III) species were treated as singlets. All Cu(0) and Cu(II) species were treated as doublets. Geometries were optimized by density functional theory method (B3LYP) with 6-311+G\*\* basis set unless otherwise stated. A harmonic oscillator model was used for vibration frequency analysis of the optimized structures. All frequencies of the minima were positive, while transition states had one and only one negative frequency. The vibration mode of the negative frequency in the transition state was confirmed to be the one that corresponding to the reaction coordinate.

Gas phase enthalpies and entropies (pressure = 1 atm, 298.15 K) of all species were obtained via frequency calculations. No scaling factor was used for the calculated frequencies. An implicit solvation model, the PCM/UA0 polarizable continuum model, was employed for the calculation of solvation energies. The gas phase entropies were converted to corresponding entropies (1 M in MeCN) according to an empirical method developed by Wertz.<sup>S5</sup>

The transition state (**TS<sub>3</sub>**) for the reaction of **3** and **4** to **5** and **6** was located at the level of B3LYP/LANL2DZ. Single-point and solvation energies were calculated for **3**, **4**, and **TS<sub>3</sub>** at the level of B3LYP/6-311+G\*\*. These numbers and thermal corrections at the level of B3LYP/LANL2DZ were used to obtain the activation free energy.

**Full reference for 14(a):**

Gaussian03, Revision E.01, Frisch, M. J.; Trucks, G. W.; Schlegel, H. B.; Scuseria, G. E.; Robb, M. A.; Cheeseman, J. R.; Montgomery, J. A.; Vreven, T.; Kudin, K. N.; Burant, J. C.; Millam, J. M.; Iyengar, S. S.; Tomasi, J.; Barone, V.; Mennucci, B.; Cossi, M.; Scalmani, G.; Rega, N.; Petersson, G. A.; Nakatsuji, H.; Hada, M.; Ehara, M.; Toyota, K.; Fukuda, R.; Hasegawa, J.; Ishida, M.; Nakajima, T.; Honda, Y.; Kitao, O.; Nakai, H.; Klene, M.; Li, X.; Knox, J. E.; Hratchian, H. P.; Cross, J. B.; Bakken, V.; Adamo, C.; Jaramillo, J.; Gomperts, R.; Stratmann, R. E.; Yazyev, O.; Austin, A. J.; Cammi, R.; Pomelli, C.; Ochterski, J. W.; Ayala, P. Y.; Morokuma, K.; Voth, G. A.; Salvador, P.; Dannenberg, J. J.; Zakrzewski, V. G.; Dapprich, S.; Daniels, A. D.; Strain, M. C.; Farkas, O.; Malick, D. K.; Rabuck, A. D.; Raghavachari, K.; Foresman, J. B.; Ortiz, J. V.; Cui, Q.; Baboul, A. G.; Clifford, S.; Cioslowski, J.; Stefanov, B. B.; Liu, G.; Liashenko, A.; Piskorz, P.; Komaromi, I.; Martin, R. L.; Fox, D. J.; Keith, T.; Al-Laham, M. A.; Peng, C. Y.; Nanayakkara, A.; Challacombe, M.; Gill, P. M. W.; Johnson, B.; Chen, W.; Wong, M. W.; Gonzalez, C.; Pople, J. A. Gaussian, Inc., Wallingford, CT, **2004**.



**Scheme S1.** Relative energies of various Cu(III) species, reductive elimination transition states, and **10**.

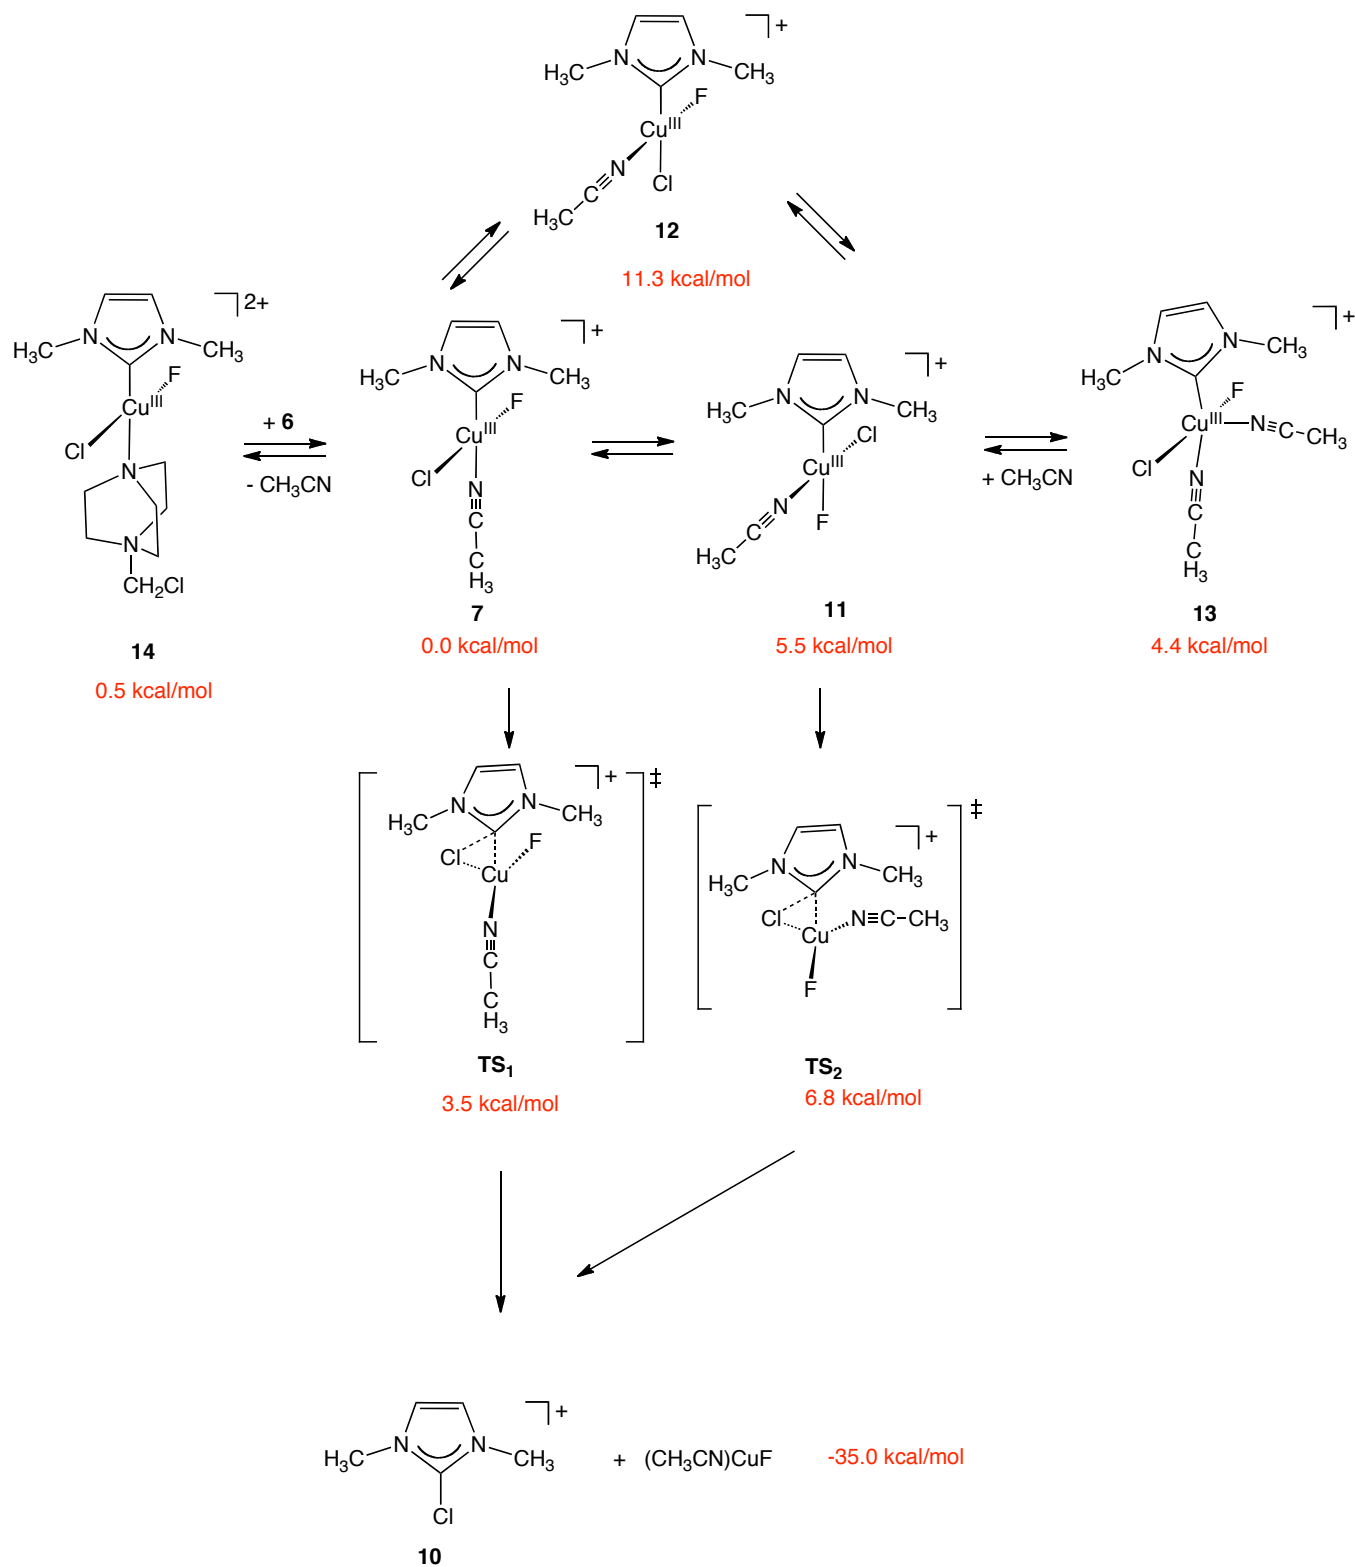

**Scheme S2.** Relative energies of various Cu(II) species and corresponding reaction free energies to form **10**.

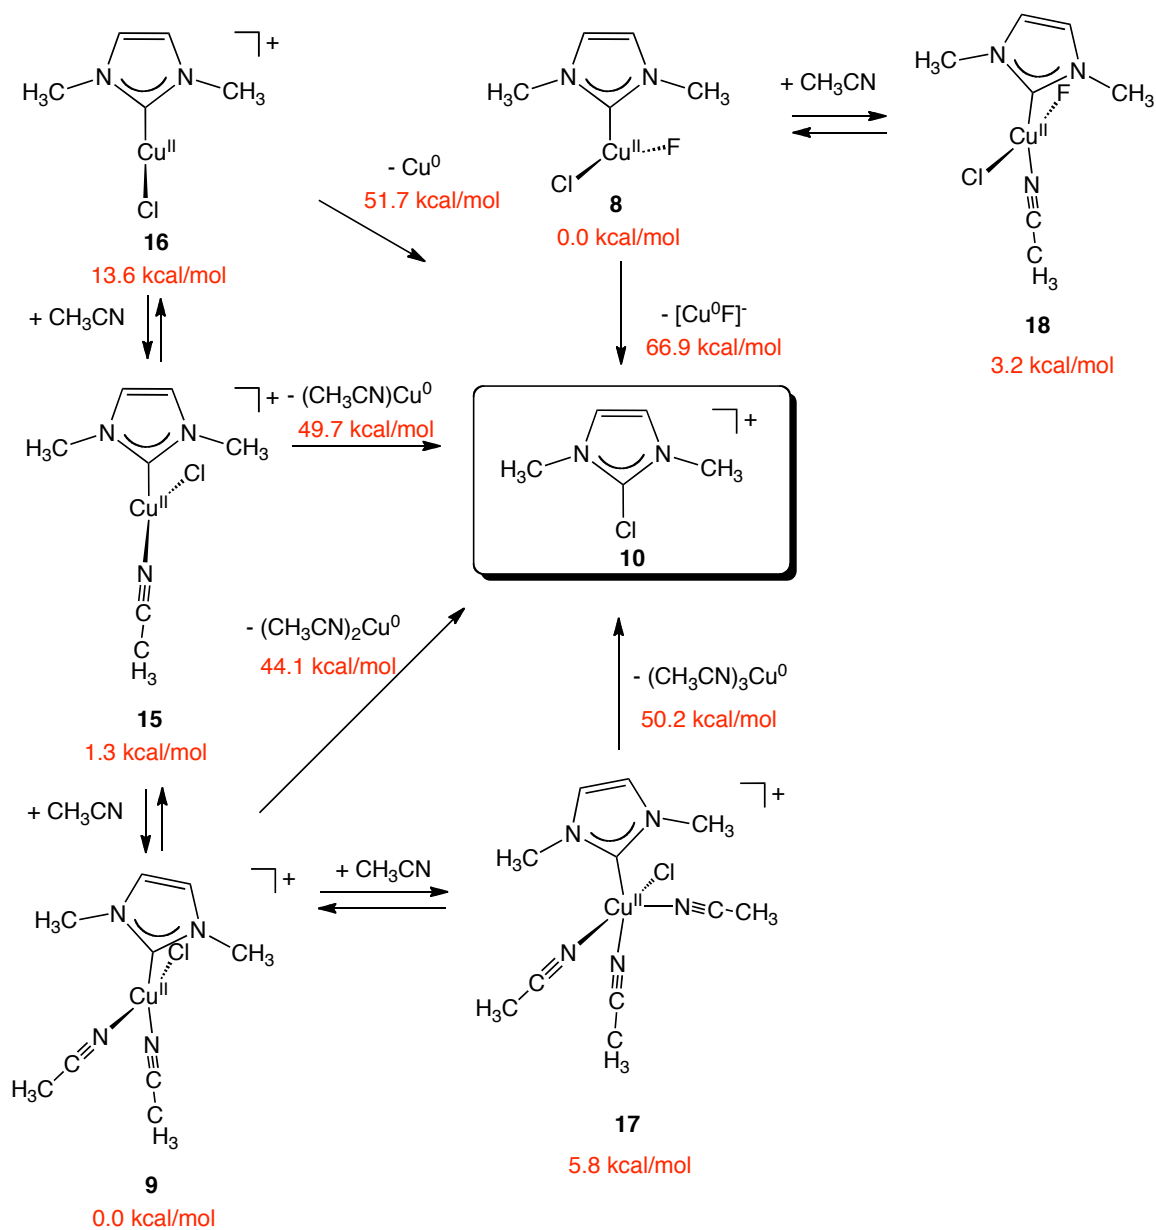

## Wertz Method

Wertz's method is composed of two steps, each of which requires a thermodynamic cycle. In the first step, the entropy change from the gaseous state of MeCN (standard state,  $S_g^{\circ} = 0.261 \text{ kJ mol}^{-1} \text{ K}^{-1}$ ) to liquid state ( $S_l^{\circ} = 0.150 \text{ kJ mol}^{-1} \text{ K}^{-1}$ ) is separated into two steps: (i) the adiabatic compression of an ideal MeCN gas in the standard state to a hypothetical ideal gas state with the concentration equal to that of the liquid state ( $d=0.786 \text{ g/ml}$ ,  $298 \text{ K}$ ,  $19.16 \text{ M}$ ); and (ii) conversion of the hypothetical state to the final liquid state. (Scheme S3)

### Scheme S3.

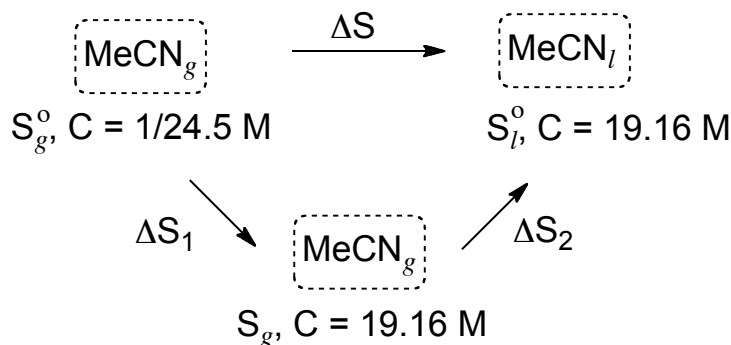

The entropy change of the first substep ( $\Delta S_1$ ) can be estimated according to Maxwell's relation, while that of the second step ( $\Delta S_2$ ) can be derived from the thermodynamic cycle. The fraction of entropy lost in second step is defined as a coefficient,  $\alpha$ , which was calculated to be 0.29.

$$dG = -SdT + VdP = VdP \quad (dT = 0) \quad \text{Maxwell Relation}$$

$$\Delta G = \int_{P_1}^{P_2} VdP = \int_{P_1}^{P_2} \frac{RT}{P} dP = RT \ln \frac{P_2}{P_1} = -T\Delta S$$

$$\Delta S_1 = -R \ln \frac{P_2}{P_1} = -0.051 \text{ kJ Mol}^{-1} \text{ K}^{-1}$$

$$\alpha = \frac{\Delta S_2}{S_g} = \frac{S_g - S_l^{\circ}}{S_g} = \frac{S_g^{\circ} + \Delta S_1 - S_l^{\circ}}{S_g} = 0.29$$

$$\Delta S_2 = 0.29 S_g$$

In the second step, the entropy change from the gas state of any given molecule, **M**, in standard state to its 1 M state in MeCN is composed of three substeps: (i) adiabatic compression of ideal **M** gas in standard state to a hypothetical ideal gas state with the concentration equal to that of the liquid state (19.16 M); (ii) conversion of the hypothetical ideal gas state to a hypothetical liquid state; and (iii) expansion of the hypothetical liquid state to the 1 M state in MeCN. (Scheme S4)

**Scheme S4.**

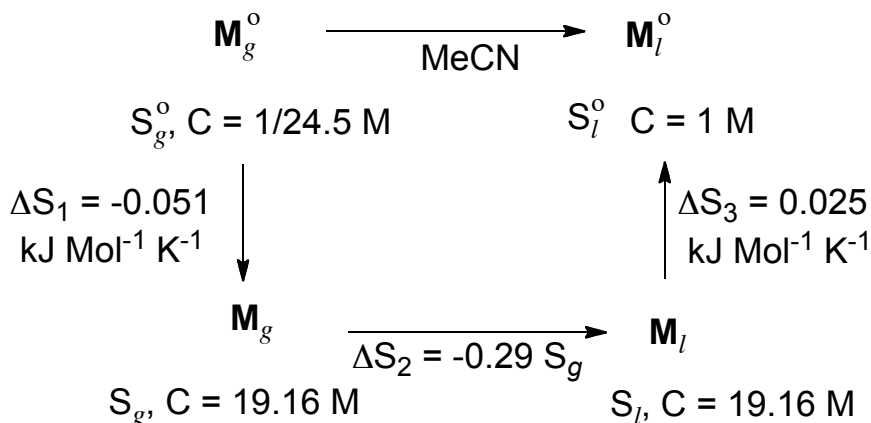

The entropy change of the first and the third step can be estimated according to Maxwell's relations. The fraction of entropy loss in the second step is assumed to be equal to  $\alpha$ . The calculated gas phase entropy of **M** in standard state is then converted to the corresponding entropy in its 1 M state in MeCN according to the following equation and used for the calculations of free energies in MeCN.

$$S_l^{\circ} = S_g^{\circ} + \Delta S_1 + \Delta S_2 + \Delta S_3 = 0.71 \times S_g^{\circ} - 0.0112 \text{ kJ Mol}^{-1} \text{ K}^{-1}$$

See references s6-17 for examples of other applications of Wertz method.

**Reference:**

- s5. Wertz, D. H. *J. Am. Chem. Soc.* **1980**, *102*, 5316-5322.
- s6. Williams, I. H.; Spangler, D.; Femec, D. A.; Maggiora, G. M.; Schowen, R. L. *J. Am. Chem. Soc.* **1983**, *105*, 31-40.
- s7. Williams, I. H. *J. Am. Chem. Soc.* **1987**, *109*, 6299-6307.
- s8. Wolfe, S.; Kim, C.-K.; Yang, K.; Weinberg, N.; Shi, Z. *J. Am. Chem. Soc.* **1995**, *117*, 4240-4260.
- s9. Cooper, J.; Ziegler, T. *Inorg. Chem.* **2002**, *41*, 6614-6622.
- s10. Hristov, I. H.; Ziegler, T. *Organometallics* **2003**, *22*, 3513-3525.
- s11. Lau, J. K.-C.; Deubel, D. V. *Chem. Eur. J.* **2005**, *11*, 2849-2855.
- s12. Lin, S.-T.; Maiti, P. K.; Goddard, III, W. A. *J. Phys. Chem. B* **2005**, *109*, 8663-8672.
- s13. Zhu, H.; Ziegler, T. *J. Organomet. Chem.* **2006**, *691*, 4486-4497.
- s14. Lau, J. K.-C.; Deubel, D. V. *J. Chem. Theory Comp.* **2006**, *2*, 103-106.
- s15. Deubel, D. V. *J. Am. Chem. Soc.* **2006**, *128*, 1654-1663.
- s16. Ahlquist, M.; Nielsen, R. J.; Periana, R. A.; Goddard III, W. A. *J. Am. Chem. Soc.* **2009**, *131*, 17110-17115.
- s17. Hesp, K. D.; Tobisch, S.; Stradiotto, M. *J. Am. Chem. Soc.* **2010**, *132*, 413-426.

### Calculated energies and coordinates (B3LYP/6-311+G\*\*):

3

Sum of electronic and zero-point Energies= -2405.613910  
Sum of electronic and thermal Energies= -2405.603230  
Sum of electronic and thermal Enthalpies= -2405.602286  
Sum of electronic and thermal Free Energies= -2405.652374  
<psi(f)| H |psi(f)> (a.u.) = -2405.738482  
<psi(f)|H+V(f)/2|psi(f)> (a.u.) = -2405.768425  
Total free energy in solution:  
with all non electrostatic terms (a.u.) = -2405.750477

|    |           |           |           |
|----|-----------|-----------|-----------|
| N  | 0.002786  | 0.000679  | 0.016064  |
| C  | 0.003889  | 0.001266  | 1.377928  |
| N  | 1.325009  | 0.000677  | 1.708562  |
| C  | 2.126836  | -0.000290 | 0.579394  |
| C  | 1.292429  | -0.000301 | -0.488679 |
| Cu | -1.499691 | 0.003383  | 2.552561  |
| Cl | -3.174730 | 0.005676  | 3.861140  |
| C  | 1.834639  | 0.001909  | 3.076785  |
| C  | -1.201443 | 0.001888  | -0.809521 |
| H  | 1.503311  | -0.001120 | -1.544571 |
| H  | 3.202376  | -0.001097 | 0.630299  |
| H  | 0.986379  | -0.002996 | 3.758555  |
| H  | 2.443075  | -0.887129 | 3.252939  |
| H  | 2.434265  | 0.896544  | 3.254968  |
| H  | -2.068224 | -0.002896 | -0.151457 |
| H  | -1.229171 | 0.896458  | -1.434539 |
| H  | -1.225176 | -0.887217 | -1.442405 |

4

Sum of electronic and zero-point Energies= -943.910120  
Sum of electronic and thermal Energies= -943.900390  
Sum of electronic and thermal Enthalpies= -943.899446  
Sum of electronic and thermal Free Energies= -943.945029  
<psi(f)| H |psi(f)> (a.u.) = -944.127132  
<psi(f)|H+V(f)/2|psi(f)> (a.u.) = -944.419994  
Total free energy in solution:  
with all non electrostatic terms (a.u.) = -944.408894

|   |          |          |           |
|---|----------|----------|-----------|
| N | 0.010486 | 0.002496 | -0.004985 |
|---|----------|----------|-----------|

|    |           |           |           |
|----|-----------|-----------|-----------|
| C  | 0.007167  | 0.008303  | 1.519397  |
| C  | 1.467019  | -0.006323 | 2.035954  |
| N  | 2.343280  | 0.399148  | 0.878825  |
| C  | 1.851811  | 1.682702  | 0.261102  |
| C  | 0.538548  | 1.348822  | -0.488986 |
| C  | 0.952290  | -1.096932 | -0.479773 |
| C  | 2.410438  | -0.696773 | -0.154321 |
| F  | 3.625403  | 0.615603  | 1.364777  |
| C  | -1.430342 | -0.249332 | -0.492595 |
| Cl | -1.573031 | -0.150164 | -2.242955 |
| H  | -0.530776 | 0.899236  | 1.842883  |
| H  | -0.530424 | -0.872718 | 1.869652  |
| H  | 1.625483  | 0.715498  | 2.837119  |
| H  | 1.801539  | -0.989554 | 2.365572  |
| H  | 0.687654  | 1.275468  | -1.564059 |
| H  | -0.220797 | 2.105842  | -0.294152 |
| H  | 2.629332  | 2.038752  | -0.414633 |
| H  | 1.721082  | 2.400831  | 1.070137  |
| H  | 2.952485  | -0.297647 | -1.011122 |
| H  | 2.975847  | -1.522527 | 0.277603  |
| H  | 0.817395  | -1.225376 | -1.552539 |
| H  | 0.657451  | -2.016410 | 0.026074  |
| H  | -1.707060 | -1.247502 | -0.156982 |
| H  | -2.058467 | 0.508640  | -0.027216 |

## 5

Sum of electronic and zero-point Energies= -2505.159141  
 Sum of electronic and thermal Energies= -2505.146773  
 Sum of electronic and thermal Enthalpies= -2505.145829  
 Sum of electronic and thermal Free Energies= -2505.201158  
 $\langle \text{psi}(f) | H | \text{psi}(f) \rangle$  (a.u.) = -2505.287555  
 $\langle \text{psi}(f) | H + V(f)/2 | \text{psi}(f) \rangle$  (a.u.) = -2505.380777  
 Total free energy in solution:  
 with all non electrostatic terms (a.u.) = -2505.362321

|    |           |           |           |
|----|-----------|-----------|-----------|
| C  | 0.012290  | 0.002600  | 0.005462  |
| N  | 0.011783  | 0.016160  | 1.392691  |
| C  | 1.284062  | 0.011352  | 1.795758  |
| N  | 2.099341  | -0.042537 | 0.740487  |
| C  | 1.309074  | -0.033859 | -0.399685 |
| C  | -1.179624 | 0.082279  | 2.257302  |
| Cu | 1.847025  | 0.228738  | 3.578252  |
| F  | 1.887983  | 1.970708  | 3.553147  |

|    |           |           |           |
|----|-----------|-----------|-----------|
| C  | 3.572522  | -0.051287 | 0.772602  |
| Cl | 1.824968  | -1.846260 | 3.693845  |
| H  | -0.903364 | 0.034113  | -0.560537 |
| H  | 1.740304  | -0.040208 | -1.386483 |
| H  | 3.917933  | -0.882625 | 1.386275  |
| H  | 3.932487  | -0.184089 | -0.244809 |
| H  | 3.934573  | 0.898628  | 1.166158  |
| H  | -1.156783 | -0.740235 | 2.971427  |
| H  | -1.204100 | 1.042904  | 2.771991  |
| H  | -2.060683 | -0.015231 | 1.627570  |

## 6

|                                                                            |                      |
|----------------------------------------------------------------------------|----------------------|
| Sum of electronic and zero-point Energies=                                 | -844.517817          |
| Sum of electronic and thermal Energies=                                    | -844.508972          |
| Sum of electronic and thermal Enthalpies=                                  | -844.508027          |
| Sum of electronic and thermal Free Energies=                               | -844.552037          |
| $\langle \text{psi}(f)   \text{H}   \text{psi}(f) \rangle$                 | (a.u.) = -844.731720 |
| $\langle \text{psi}(f)   \text{H} + \text{V}(f)/2   \text{psi}(f) \rangle$ | (a.u.) = -844.816382 |
| Total free energy in solution:                                             |                      |
| with all non electrostatic terms                                           | (a.u.) = -844.805783 |

|    |           |           |           |
|----|-----------|-----------|-----------|
| N  | 0.008646  | 0.000695  | -0.004886 |
| C  | 0.006604  | -0.003316 | 1.523302  |
| C  | 1.485888  | 0.004319  | 2.017413  |
| N  | 2.402709  | 0.184888  | 0.894950  |
| C  | 2.065452  | 1.410885  | 0.172065  |
| C  | 0.652950  | 1.300522  | -0.478574 |
| C  | 0.847110  | -1.179639 | -0.485848 |
| C  | 2.314109  | -0.962666 | -0.007687 |
| C  | -1.424969 | -0.113183 | -0.460614 |
| Cl | -1.616255 | -0.059300 | -2.226096 |
| H  | -0.546255 | 0.882826  | 1.836618  |
| H  | -0.540972 | -0.890635 | 1.842300  |
| H  | 1.630878  | 0.810530  | 2.737297  |
| H  | 1.722759  | -0.934380 | 2.519601  |
| H  | 0.690731  | 1.254877  | -1.564852 |
| H  | -0.016289 | 2.110693  | -0.186494 |
| H  | 2.815224  | 1.590577  | -0.598911 |
| H  | 2.101391  | 2.250095  | 0.867929  |
| H  | 2.970019  | -0.787400 | -0.861124 |
| H  | 2.673542  | -1.854994 | 0.506155  |
| H  | 0.755188  | -1.222339 | -1.569160 |

|   |           |           |           |
|---|-----------|-----------|-----------|
| H | 0.391163  | -2.074013 | -0.058959 |
| H | -1.812993 | -1.063701 | -0.102344 |
| H | -1.977667 | 0.718192  | -0.029506 |

### MeCN

|                                              |                      |
|----------------------------------------------|----------------------|
| Sum of electronic and zero-point Energies=   | -132.751002          |
| Sum of electronic and thermal Energies=      | -132.747390          |
| Sum of electronic and thermal Enthalpies=    | -132.746446          |
| Sum of electronic and thermal Free Energies= | -132.775018          |
| <psi(f)  H  psi(f)>                          | (a.u.) = -132.794058 |
| <psi(f) H+V(f)/2 psi(f)>                     | (a.u.) = -132.804984 |
| Total free energy in solution:               |                      |
| with all non electrostatic terms             | (a.u.) = -132.796362 |

|   |           |           |           |
|---|-----------|-----------|-----------|
| C | 0.000035  | -0.000177 | 0.007141  |
| C | 0.001243  | -0.000713 | 1.463641  |
| N | 0.006588  | 0.000812  | 2.616207  |
| H | -1.021552 | 0.076082  | -0.370418 |
| H | 0.576557  | 0.846622  | -0.370497 |
| H | 0.444780  | -0.922609 | -0.371478 |

### 7

|                                              |                       |
|----------------------------------------------|-----------------------|
| Sum of electronic and zero-point Energies=   | -2637.965706          |
| Sum of electronic and thermal Energies=      | -2637.948647          |
| Sum of electronic and thermal Enthalpies=    | -2637.947703          |
| Sum of electronic and thermal Free Energies= | -2638.015074          |
| <psi(f)  H  psi(f)>                          | (a.u.) = -2638.143430 |
| <psi(f) H+V(f)/2 psi(f)>                     | (a.u.) = -2638.215871 |
| Total free energy in solution:               |                       |
| with all non electrostatic terms             | (a.u.) = -2638.190086 |

|    |           |           |           |
|----|-----------|-----------|-----------|
| C  | 0.016747  | 0.004357  | 0.022446  |
| N  | 0.016306  | 0.001759  | 1.410643  |
| C  | 1.284358  | -0.003360 | 1.832769  |
| N  | 2.095577  | -0.012232 | 0.769963  |
| C  | 1.312620  | -0.001311 | -0.377131 |
| C  | -1.172894 | 0.027105  | 2.272680  |
| Cu | 1.806652  | 0.160335  | 3.630690  |
| Cl | 1.984680  | -1.978058 | 3.557045  |
| C  | 3.563752  | 0.010199  | 0.802653  |



|   |           |           |           |
|---|-----------|-----------|-----------|
| N | 2.360066  | 0.374352  | 5.496687  |
| C | 2.675381  | 0.565040  | 6.583067  |
| C | 3.072873  | 0.809092  | 7.953738  |
| F | 1.527751  | 1.913210  | 3.410737  |
| H | -0.897405 | 0.013515  | -0.545735 |
| H | 1.748369  | 0.003955  | -1.361356 |
| H | 3.921184  | -0.745054 | 1.501559  |
| H | 3.932166  | -0.225971 | -0.193187 |
| H | 3.912912  | 1.000739  | 1.095409  |
| H | -1.215197 | -0.884893 | 2.868542  |
| H | -1.133902 | 0.906840  | 2.914734  |
| H | -2.054416 | 0.082711  | 1.638139  |
| H | 2.359681  | 0.335493  | 8.632063  |
| H | 4.066383  | 0.390127  | 8.128001  |
| H | 3.094049  | 1.884414  | 8.143368  |

### TS<sub>1</sub>

|                                                                            |                       |
|----------------------------------------------------------------------------|-----------------------|
| Sum of electronic and zero-point Energies=                                 | -2637.956418          |
| Sum of electronic and thermal Energies=                                    | -2637.939856          |
| Sum of electronic and thermal Enthalpies=                                  | -2637.938912          |
| Sum of electronic and thermal Free Energies=                               | -2638.004139          |
| $\langle \text{psi}(f)   \text{H}   \text{psi}(f) \rangle$                 | (a.u.) = -2638.131348 |
| $\langle \text{psi}(f)   \text{H} + \text{V}(f)/2   \text{psi}(f) \rangle$ | (a.u.) = -2638.209715 |
| Total free energy in solution:                                             |                       |
| with all non electrostatic terms                                           | (a.u.) = -2638.184232 |

|    |           |           |           |
|----|-----------|-----------|-----------|
| C  | -0.005749 | -0.007841 | 0.007065  |
| N  | 0.014634  | 0.002898  | 1.358638  |
| C  | 1.334997  | 0.007758  | 1.773102  |
| C  | 2.112245  | -0.050193 | 0.662066  |
| N  | 1.269141  | -0.090637 | -0.434608 |
| C  | -1.151769 | 0.151762  | 2.233555  |
| C  | 1.695537  | -0.060446 | -1.836539 |
| Cu | -1.310772 | 1.091999  | -0.963288 |
| F  | -0.431917 | 2.594228  | -0.427295 |
| Cl | -1.393441 | -1.162299 | -0.903462 |
| N  | -2.819712 | 1.805776  | -2.055601 |
| C  | -3.616680 | 2.388257  | -2.643325 |
| C  | -4.618978 | 3.128281  | -3.382866 |
| H  | 3.183167  | -0.048620 | 0.553259  |
| H  | 1.601465  | 0.069308  | 2.814218  |
| H  | -1.950292 | -0.505987 | 1.892318  |
| H  | -0.863189 | -0.137454 | 3.241897  |

|   |           |           |           |
|---|-----------|-----------|-----------|
| H | -1.484345 | 1.190973  | 2.229253  |
| H | 1.068813  | -0.731117 | -2.423168 |
| H | 1.627709  | 0.959002  | -2.219565 |
| H | 2.726247  | -0.404783 | -1.888943 |
| H | -4.588121 | 2.841334  | -4.436131 |
| H | -5.610734 | 2.911010  | -2.980538 |
| H | -4.421020 | 4.198808  | -3.295060 |

## 8

|                                                              |                       |
|--------------------------------------------------------------|-----------------------|
| Sum of electronic and zero-point Energies=                   | -2505.473357          |
| Sum of electronic and thermal Energies=                      | -2505.461344          |
| Sum of electronic and thermal Enthalpies=                    | -2505.460400          |
| Sum of electronic and thermal Free Energies=                 | -2505.513742          |
| $\langle \text{psi}(f)   H   \text{psi}(f) \rangle$          | (a.u.) = -2505.600515 |
| $\langle \text{psi}(f)   H + V(f)/2   \text{psi}(f) \rangle$ | (a.u.) = -2505.630652 |
| Total free energy in solution:                               |                       |
| with all non electrostatic terms                             | (a.u.) = -2505.612668 |

|    |           |           |           |
|----|-----------|-----------|-----------|
| N  | 0.014681  | -0.002377 | 0.001707  |
| C  | 0.014476  | 0.001222  | 1.385466  |
| C  | 1.312541  | 0.004249  | 1.776066  |
| N  | 2.077722  | 0.011477  | 0.624172  |
| C  | 1.284392  | 0.003801  | -0.474603 |
| C  | 3.545593  | -0.019758 | 0.623568  |
| Cu | 1.908237  | 0.000658  | -2.364130 |
| Cl | 0.549924  | -1.049584 | -3.694860 |
| C  | -1.208032 | 0.053589  | -0.803030 |
| F  | 3.491947  | 0.892923  | -2.215904 |
| H  | 1.752669  | 0.000037  | 2.758469  |
| H  | -0.895410 | 0.005752  | 1.960736  |
| H  | -0.976499 | -0.242941 | -1.823170 |
| H  | -1.940489 | -0.637584 | -0.385053 |
| H  | -1.614608 | 1.066835  | -0.793618 |
| H  | 3.897963  | 0.327848  | -0.347133 |
| H  | 3.908918  | 0.644830  | 1.407911  |
| H  | 3.893977  | -1.036303 | 0.817462  |

## 9

|                                            |              |
|--------------------------------------------|--------------|
| Sum of electronic and zero-point Energies= | -2670.893716 |
| Sum of electronic and thermal Energies=    | -2670.872413 |
| Sum of electronic and thermal Enthalpies=  | -2670.871469 |

Sum of electronic and thermal Free Energies= -2670.951147  
 <psi(f)| H |psi(f)> (a.u.) = -2671.112787  
 <psi(f)|H+V(f)/2|psi(f)> (a.u.) = -2671.184532  
 Total free energy in solution:  
 with all non electrostatic terms (a.u.) = -2671.150611

|    |           |           |           |
|----|-----------|-----------|-----------|
| N  | 0.071399  | -0.126957 | 0.070823  |
| C  | 0.160987  | -0.020506 | 1.449050  |
| C  | 1.468936  | 0.174008  | 1.744256  |
| N  | 2.151350  | 0.177085  | 0.537223  |
| C  | 1.293717  | -0.007587 | -0.492452 |
| C  | 3.586563  | 0.428229  | 0.412946  |
| Cu | 1.729488  | 0.024404  | -2.431587 |
| N  | 3.095885  | 0.328801  | -3.955459 |
| C  | 3.678494  | 0.782160  | -4.836502 |
| C  | 4.398862  | 1.376378  | -5.945394 |
| C  | -1.180284 | -0.340659 | -0.660251 |
| Cl | 0.730441  | 1.984597  | -2.753074 |
| N  | 1.693101  | -2.026538 | -2.797871 |
| C  | 1.639742  | -3.150651 | -3.032561 |
| C  | 1.572232  | -4.568608 | -3.332675 |
| H  | 1.965031  | 0.313841  | 2.689476  |
| H  | -0.701820 | -0.088097 | 2.089352  |
| H  | -1.122191 | 0.171090  | -1.618768 |
| H  | -1.359907 | -1.407263 | -0.806184 |
| H  | -1.999811 | 0.087038  | -0.084626 |
| H  | 3.895696  | 0.224343  | -0.610446 |
| H  | 3.808334  | 1.469398  | 0.651854  |
| H  | 4.135764  | -0.228480 | 1.088258  |
| H  | 5.432591  | 1.574542  | -5.654781 |
| H  | 4.390598  | 0.700613  | -6.802856 |
| H  | 3.918987  | 2.317200  | -6.224625 |
| H  | 2.524358  | -4.904689 | -3.748510 |
| H  | 1.360676  | -5.132531 | -2.421908 |
| H  | 0.779642  | -4.754115 | -4.060752 |

## 10

Sum of electronic and zero-point Energies= -764.787667  
 Sum of electronic and thermal Energies= -764.779177  
 Sum of electronic and thermal Enthalpies= -764.778233  
 Sum of electronic and thermal Free Energies= -764.822238  
 <psi(f)| H |psi(f)> (a.u.) = -764.917363  
 <psi(f)|H+V(f)/2|psi(f)> (a.u.) = -764.993216

Total free energy in solution:  
with all non electrostatic terms (a.u.) = -764.979740

|    |           |           |           |
|----|-----------|-----------|-----------|
| C  | 0.010359  | 0.014595  | 0.008169  |
| N  | 0.012084  | 0.000247  | 1.350084  |
| C  | 1.329318  | -0.027233 | 1.775141  |
| C  | 2.114593  | -0.029082 | 0.666867  |
| N  | 1.276945  | -0.002722 | -0.435029 |
| C  | -1.180056 | 0.011761  | 2.213990  |
| C  | 1.696782  | 0.004921  | -1.846177 |
| Cl | -1.369065 | 0.049031  | -0.969301 |
| H  | 3.186072  | -0.046621 | 0.564568  |
| H  | 1.587977  | -0.042877 | 2.819980  |
| H  | -1.789651 | -0.868890 | 2.014072  |
| H  | -0.844629 | -0.005181 | 3.248016  |
| H  | -1.758507 | 0.917215  | 2.033245  |
| H  | 1.305204  | -0.876584 | -2.352870 |
| H  | 1.335395  | 0.909546  | -2.334203 |
| H  | 2.783516  | -0.013160 | -1.872480 |

### Cu<sup>I</sup>F(MeCN)

Sum of electronic and zero-point Energies= -1873.191214  
Sum of electronic and thermal Energies= -1873.184426  
Sum of electronic and thermal Enthalpies= -1873.183482  
Sum of electronic and thermal Free Energies= -1873.222188  
<psi(f)| H |psi(f)> (a.u.) = -1873.235283  
<psi(f)|H+V(f)/2|psi(f)> (a.u.) = -1873.268395  
Total free energy in solution:  
with all non electrostatic terms (a.u.) = -1873.254949

|    |           |           |           |
|----|-----------|-----------|-----------|
| C  | 0.000058  | -0.000047 | 0.017786  |
| C  | 0.002196  | 0.000823  | 1.468454  |
| N  | 0.004566  | 0.001049  | 2.619390  |
| Cu | 0.007716  | 0.003323  | 4.448287  |
| F  | 0.010788  | 0.005507  | 6.225442  |
| H  | 0.998298  | 0.236588  | -0.356734 |
| H  | -0.294766 | -0.983642 | -0.354143 |
| H  | -0.704978 | 0.746275  | -0.354599 |

## 11

Sum of electronic and zero-point Energies= -2637.947689

Sum of electronic and thermal Energies= -2637.930683  
 Sum of electronic and thermal Enthalpies= -2637.929739  
 Sum of electronic and thermal Free Energies= -2637.995998  
 $\langle \text{psi}(f) | H | \text{psi}(f) \rangle$  (a.u.) = -2638.121568  
 $\langle \text{psi}(f) | H + V(f)/2 | \text{psi}(f) \rangle$  (a.u.) = -2638.208100  
 Total free energy in solution:  
 with all non electrostatic terms (a.u.) = -2638.181907

|    |           |           |           |
|----|-----------|-----------|-----------|
| C  | 0.031688  | 0.013504  | 0.010690  |
| C  | 0.025881  | 0.005248  | 1.367298  |
| N  | 1.349675  | 0.012441  | 1.780040  |
| C  | 2.145434  | 0.027607  | 0.698169  |
| N  | 1.359069  | 0.017031  | -0.390473 |
| C  | 1.798606  | -0.114751 | 3.172752  |
| Cu | 4.058444  | 0.083871  | 0.714812  |
| F  | 5.839590  | 0.031090  | 0.723397  |
| C  | 1.817560  | 0.014548  | -1.785572 |
| Cl | 3.815241  | -2.036776 | 0.695912  |
| N  | 4.191401  | 2.013214  | 0.746512  |
| C  | 4.629076  | 3.074372  | 0.765654  |
| C  | 5.200159  | 4.403256  | 0.789367  |
| H  | -0.791053 | 0.001708  | 2.068574  |
| H  | -0.779162 | 0.025911  | -0.697573 |
| H  | 2.770085  | -0.509067 | -1.849251 |
| H  | 1.087254  | -0.519557 | -2.390679 |
| H  | 1.921152  | 1.036071  | -2.153316 |
| H  | 2.685245  | 0.497313  | 3.331647  |
| H  | 1.004846  | 0.239526  | 3.827448  |
| H  | 2.025984  | -1.157764 | 3.394752  |
| H  | 4.863000  | 4.937128  | 1.680591  |
| H  | 6.289875  | 4.320891  | 0.806644  |
| H  | 4.892955  | 4.955670  | -0.101388 |

## TS<sub>2</sub>

Sum of electronic and zero-point Energies= -2637.939771  
 Sum of electronic and thermal Energies= -2637.923012  
 Sum of electronic and thermal Enthalpies= -2637.922067  
 Sum of electronic and thermal Free Energies= -2637.988825  
 $\langle \text{psi}(f) | H | \text{psi}(f) \rangle$  (a.u.) = -2638.111234  
 $\langle \text{psi}(f) | H + V(f)/2 | \text{psi}(f) \rangle$  (a.u.) = -2638.203844  
 Total free energy in solution:  
 with all non electrostatic terms (a.u.) = -2638.177684

|    |           |           |           |
|----|-----------|-----------|-----------|
| N  | 0.030017  | 0.050751  | 0.033680  |
| C  | 0.046051  | -0.078423 | 1.408491  |
| C  | 1.347138  | -0.149829 | 1.798357  |
| N  | 2.127361  | -0.064375 | 0.662136  |
| C  | 1.313097  | 0.100408  | -0.414727 |
| C  | 3.594099  | -0.105179 | 0.629130  |
| Cu | 1.823093  | 1.307165  | -1.895497 |
| N  | 1.671741  | 3.084514  | -1.064070 |
| C  | 1.755916  | 4.229610  | -1.134895 |
| C  | 1.867946  | 5.668151  | -1.244775 |
| Cl | 1.750961  | -0.929634 | -2.064799 |
| C  | -1.173593 | 0.156358  | -0.799540 |
| F  | 2.341937  | 1.962707  | -3.506524 |
| H  | 1.779336  | -0.242322 | 2.780249  |
| H  | -0.860503 | -0.097456 | 1.989232  |
| H  | -1.050547 | -0.451883 | -1.694710 |
| H  | -2.019408 | -0.219100 | -0.227454 |
| H  | -1.353833 | 1.195787  | -1.077689 |
| H  | 4.000595  | 0.902239  | 0.528435  |
| H  | 3.944802  | -0.547800 | 1.559053  |
| H  | 3.921847  | -0.723284 | -0.205701 |
| H  | 2.603682  | 6.042007  | -0.529596 |
| H  | 2.189505  | 5.919745  | -2.258741 |
| H  | 0.900841  | 6.135047  | -1.046592 |

## 12

Sum of electronic and zero-point Energies= -2637.938282  
 Sum of electronic and thermal Energies= -2637.921402  
 Sum of electronic and thermal Enthalpies= -2637.920458  
 Sum of electronic and thermal Free Energies= -2637.987388  
 $\langle \text{psi}(f) | H | \text{psi}(f) \rangle$  (a.u.) = -2638.111707  
 $\langle \text{psi}(f) | H + V(f)/2 | \text{psi}(f) \rangle$  (a.u.) = -2638.198562  
 Total free energy in solution:  
 with all non electrostatic terms (a.u.) = -2638.172259

|   |           |           |           |
|---|-----------|-----------|-----------|
| C | -0.039229 | 0.015859  | 0.020361  |
| N | -0.019139 | 0.050115  | 1.361835  |
| C | 1.292838  | -0.039248 | 1.798946  |
| C | 2.077323  | -0.115189 | 0.695183  |
| N | 1.231284  | -0.079878 | -0.404932 |
| C | -1.195870 | 0.203740  | 2.231160  |
| C | 1.689580  | -0.027100 | -1.797729 |

|    |           |           |           |
|----|-----------|-----------|-----------|
| Cu | -1.629308 | 0.287594  | -1.070748 |
| N  | -1.693193 | -1.484813 | -1.684382 |
| C  | -1.902142 | -2.528425 | -2.112777 |
| C  | -2.189939 | -3.832411 | -2.667816 |
| Cl | -3.398461 | 0.727403  | -2.260005 |
| F  | -1.541196 | 1.923652  | -0.423443 |
| H  | 3.146654  | -0.188645 | 0.592501  |
| H  | 1.547432  | -0.041845 | 2.845107  |
| H  | -1.735504 | -0.740697 | 2.309022  |
| H  | -0.855033 | 0.505306  | 3.219291  |
| H  | -1.835795 | 0.982972  | 1.820548  |
| H  | 0.854040  | -0.236493 | -2.462281 |
| H  | 2.084796  | 0.964683  | -2.019521 |
| H  | 2.464345  | -0.777561 | -1.950318 |
| H  | -1.982049 | -4.608945 | -1.928468 |
| H  | -3.243981 | -3.873171 | -2.954544 |
| H  | -1.570863 | -3.998423 | -3.552772 |

### 13

|                                              |                       |
|----------------------------------------------|-----------------------|
| Sum of electronic and zero-point Energies=   | -2770.731464          |
| Sum of electronic and thermal Energies=      | -2770.709055          |
| Sum of electronic and thermal Enthalpies=    | -2770.708111          |
| Sum of electronic and thermal Free Energies= | -2770.789204          |
| <psi(f)  H  psi(f)>                          | (a.u.) = -2770.955162 |
| <psi(f) H+V(f)/2 psi(f)>                     | (a.u.) = -2771.024289 |
| Total free energy in solution:               |                       |
| with all non electrostatic terms             | (a.u.) = -2770.990827 |

|    |           |           |           |
|----|-----------|-----------|-----------|
| N  | -0.011397 | -0.064560 | 0.034710  |
| C  | 0.021779  | -0.028478 | 1.374401  |
| N  | 1.302213  | 0.058158  | 1.762597  |
| C  | 2.108093  | 0.090519  | 0.635718  |
| C  | 1.289321  | 0.019606  | -0.442209 |
| Cu | -1.407295 | 0.020683  | 2.610845  |
| F  | -0.854198 | 1.692647  | 3.008047  |
| C  | 1.783538  | 0.110154  | 3.150146  |
| C  | -1.197334 | -0.167697 | -0.823998 |
| Cl | -1.566642 | -2.091081 | 2.156720  |
| N  | -3.343343 | 0.965117  | 1.368214  |
| C  | -4.217409 | 1.666738  | 1.104779  |
| C  | -5.316759 | 2.559132  | 0.775755  |
| N  | -2.599519 | -0.060411 | 4.194771  |
| C  | -3.216677 | -0.107121 | 5.160139  |

|   |           |           |           |
|---|-----------|-----------|-----------|
| C | -3.997724 | -0.164449 | 6.379878  |
| H | 1.506776  | 0.022981  | -1.496284 |
| H | 3.179464  | 0.166025  | 0.705076  |
| H | 1.658532  | -0.865487 | 3.621381  |
| H | 2.839794  | 0.369883  | 3.133733  |
| H | 1.224780  | 0.875185  | 3.685663  |
| H | -1.949730 | -0.770634 | -0.323859 |
| H | -1.594024 | 0.825636  | -1.030403 |
| H | -0.901536 | -0.652523 | -1.752503 |
| H | -5.434936 | 2.625582  | -0.307573 |
| H | -6.246232 | 2.184268  | 1.208632  |
| H | -5.115134 | 3.556527  | 1.171671  |
| H | -4.047124 | 0.827422  | 6.833698  |
| H | -5.008794 | -0.510189 | 6.155054  |
| H | -3.531952 | -0.858745 | 7.082426  |

## 14

|                                                              |                       |
|--------------------------------------------------------------|-----------------------|
| Sum of electronic and zero-point Energies=                   | -3349.647221          |
| Sum of electronic and thermal Energies=                      | -3349.624886          |
| Sum of electronic and thermal Enthalpies=                    | -3349.623942          |
| Sum of electronic and thermal Free Energies=                 | -3349.701434          |
| $\langle \text{psi}(f)   H   \text{psi}(f) \rangle$          | (a.u.) = -3349.993959 |
| $\langle \text{psi}(f)   H + V(f)/2   \text{psi}(f) \rangle$ | (a.u.) = -3350.230101 |
| Total free energy in solution:                               |                       |
| with all non electrostatic terms                             | (a.u.) = -3350.202864 |

|    |           |           |           |
|----|-----------|-----------|-----------|
| N  | 0.011385  | 0.013655  | 0.010177  |
| C  | 0.012010  | -0.000847 | 1.348413  |
| N  | 1.279222  | -0.028922 | 1.781155  |
| C  | 2.116849  | -0.042968 | 0.674434  |
| C  | 1.327309  | -0.014206 | -0.428098 |
| Cu | -1.577342 | -0.079966 | 2.405603  |
| F  | -1.778853 | -1.761981 | 1.855523  |
| C  | 1.741524  | -0.014944 | 3.176734  |
| C  | -1.171728 | 0.023173  | -0.863568 |
| N  | -3.336728 | -0.233618 | 3.578802  |
| C  | -4.347921 | 0.778122  | 3.143239  |
| C  | -5.705607 | 0.518132  | 3.842062  |
| N  | -5.482636 | -0.417758 | 5.018393  |
| C  | -5.068974 | -1.780343 | 4.485701  |
| C  | -3.946288 | -1.594050 | 3.440428  |
| C  | -4.328225 | 0.132575  | 5.840683  |
| C  | -3.021773 | 0.001403  | 5.020171  |



|    |           |           |           |
|----|-----------|-----------|-----------|
| C  | -6.707462 | -0.511414 | 5.916427  |
| Cl | -8.160717 | -1.020178 | 5.047397  |
| Cl | -1.198993 | 1.966193  | 2.875755  |
| H  | 3.188412  | -0.085656 | 0.773988  |
| H  | 1.577253  | -0.028246 | -1.475628 |
| H  | -1.662113 | 0.996043  | -0.815616 |
| H  | -0.843505 | -0.158974 | -1.884336 |
| H  | -1.845610 | -0.776079 | -0.558354 |
| H  | 1.656483  | 0.990736  | 3.587162  |
| H  | 1.155449  | -0.720136 | 3.764490  |
| H  | 2.782047  | -0.331652 | 3.193551  |
| H  | -6.427673 | 0.039108  | 3.184533  |
| H  | -6.145718 | 1.438375  | 4.226241  |
| H  | -4.475768 | 0.710427  | 2.063020  |
| H  | -3.959524 | 1.768075  | 3.375318  |
| H  | -4.744405 | -2.366375 | 5.346237  |
| H  | -5.948232 | -2.253582 | 4.052817  |
| H  | -3.174956 | -2.350536 | 3.563503  |
| H  | -4.324836 | -1.691561 | 2.424532  |
| H  | -2.419113 | -0.835594 | 5.374250  |
| H  | -2.434134 | 0.913534  | 5.112371  |
| H  | -4.275062 | -0.431697 | 6.771714  |
| H  | -4.567807 | 1.170109  | 6.074203  |
| H  | -6.485721 | -1.240156 | 6.693313  |
| H  | -6.875241 | 0.474895  | 6.344255  |

## 15

Sum of electronic and zero-point Energies= -2538.117765  
 Sum of electronic and thermal Energies= -2538.101772  
 Sum of electronic and thermal Enthalpies= -2538.100828  
 Sum of electronic and thermal Free Energies= -2538.166779  
 $\langle \text{psi}(f) | H | \text{psi}(f) \rangle$  (a.u.) = -2538.289823  
 $\langle \text{psi}(f) | H + V(f)/2 | \text{psi}(f) \rangle$  (a.u.) = -2538.366438  
 Total free energy in solution:  
 with all non electrostatic terms (a.u.) = -2538.340893

|    |           |           |           |
|----|-----------|-----------|-----------|
| N  | 0.002768  | 0.013254  | -0.003041 |
| C  | -0.000987 | 0.014303  | 1.377189  |
| C  | 1.299018  | -0.000592 | 1.774607  |
| N  | 2.067518  | -0.010431 | 0.628157  |
| C  | 1.273956  | 0.019958  | -0.468021 |
| C  | 3.533288  | -0.042948 | 0.612125  |
| Cu | 1.836605  | -0.069411 | -2.310802 |
| Cl | 1.841362  | -2.264794 | -2.439149 |

|   |           |           |           |
|---|-----------|-----------|-----------|
| C | -1.204055 | 0.011195  | -0.835716 |
| N | 2.385735  | 0.612309  | -4.069092 |
| C | 2.717233  | 0.854302  | -5.142880 |
| C | 3.134939  | 1.150282  | -6.496610 |
| H | 1.731366  | -0.008277 | 2.760725  |
| H | -0.910811 | 0.022012  | 1.953016  |
| H | -0.978494 | -0.466851 | -1.787491 |
| H | -1.978911 | -0.566710 | -0.334356 |
| H | -1.556520 | 1.030634  | -0.999260 |
| H | 3.868228  | -0.530888 | -0.301711 |
| H | 3.938149  | 0.968436  | 0.670573  |
| H | 3.883493  | -0.625606 | 1.462745  |
| H | 3.223892  | 0.219137  | -7.061287 |
| H | 2.396961  | 1.795367  | -6.978586 |
| H | 4.102559  | 1.656807  | -6.482078 |

## 16

|                                                              |                       |
|--------------------------------------------------------------|-----------------------|
| Sum of electronic and zero-point Energies=                   | -2405.317478          |
| Sum of electronic and thermal Energies=                      | -2405.306572          |
| Sum of electronic and thermal Enthalpies=                    | -2405.305628          |
| Sum of electronic and thermal Free Energies=                 | -2405.358722          |
| $\langle \text{psi}(f)   H   \text{psi}(f) \rangle$          | (a.u.) = -2405.435347 |
| $\langle \text{psi}(f)   H + V(f)/2   \text{psi}(f) \rangle$ | (a.u.) = -2405.530603 |
| Total free energy in solution:                               |                       |
| with all non electrostatic terms                             | (a.u.) = -2405.512655 |

|    |           |           |           |
|----|-----------|-----------|-----------|
| N  | 0.003065  | -0.001592 | 0.015457  |
| C  | 0.005523  | 0.000772  | 1.383614  |
| N  | 1.328986  | -0.001588 | 1.730467  |
| C  | 2.119195  | 0.008249  | 0.619025  |
| C  | 1.277660  | 0.008263  | -0.469458 |
| Cu | -1.507987 | -0.005768 | 2.553808  |
| Cl | -3.149499 | -0.186277 | 3.823473  |
| C  | 1.844291  | 0.007805  | 3.107295  |
| C  | -1.199668 | 0.007825  | -0.829898 |
| H  | 1.505532  | 0.016169  | -1.522996 |
| H  | 3.196166  | 0.016141  | 0.663753  |
| H  | 1.017172  | -0.149284 | 3.796170  |
| H  | 2.568700  | -0.796959 | 3.228874  |
| H  | 2.315180  | 0.968166  | 3.318774  |
| H  | -2.074585 | -0.149438 | -0.202888 |
| H  | -1.285861 | 0.968253  | -1.338721 |
| H  | -1.134872 | -0.796824 | -1.561700 |

17

Sum of electronic and zero-point Energies= -2803.656608  
Sum of electronic and thermal Energies= -2803.629757  
Sum of electronic and thermal Enthalpies= -2803.628812  
Sum of electronic and thermal Free Energies= -2803.722869  
<psi(f)| H |psi(f)> (a.u.) = -2803.922182  
<psi(f)|H+V(f)/2|psi(f)> (a.u.) = -2803.990528  
Total free energy in solution:  
with all non electrostatic terms (a.u.) = -2803.948513

|    |           |           |           |
|----|-----------|-----------|-----------|
| N  | 0.007281  | 0.013233  | -0.001549 |
| C  | -0.001875 | 0.010267  | 1.352229  |
| N  | 1.301297  | -0.012883 | 1.716262  |
| C  | 2.122544  | -0.018612 | 0.598596  |
| C  | 1.306070  | -0.005781 | -0.481876 |
| Cu | -1.639113 | 0.110412  | 2.510198  |
| N  | -1.152708 | 0.786575  | 4.769935  |
| C  | -1.176235 | 1.679507  | 5.496926  |
| C  | -1.214048 | 2.827911  | 6.384896  |
| C  | 1.806605  | 0.026474  | 3.087245  |
| C  | -1.185553 | 0.034102  | -0.851175 |
| N  | -3.693663 | -0.056378 | 2.917109  |
| C  | -4.824799 | 0.121274  | 3.010814  |
| C  | -6.249314 | 0.375493  | 3.118809  |
| Cl | -1.962727 | 2.275357  | 1.862954  |
| N  | -1.469107 | -1.928384 | 3.108661  |
| C  | -1.394081 | -3.030479 | 3.425442  |
| C  | -1.302739 | -4.422021 | 3.830571  |
| H  | 1.531959  | -0.005292 | -1.534367 |
| H  | 3.196651  | -0.023568 | 0.670808  |
| H  | 0.973112  | -0.075327 | 3.776158  |
| H  | 2.513424  | -0.790121 | 3.241797  |
| H  | 2.306814  | 0.978861  | 3.271083  |
| H  | -1.909161 | 0.728414  | -0.427612 |
| H  | -0.901080 | 0.380227  | -1.843616 |
| H  | -1.615967 | -0.965883 | -0.930422 |
| H  | -1.116924 | -4.483473 | 4.904781  |
| H  | -2.237831 | -4.937137 | 3.601564  |
| H  | -0.486137 | -4.913668 | 3.298176  |
| H  | -6.579654 | 0.228788  | 4.148976  |
| H  | -6.457529 | 1.404865  | 2.818759  |

|   |           |           |          |
|---|-----------|-----------|----------|
| H | -6.801460 | -0.304449 | 2.467060 |
| H | -1.497469 | 3.715218  | 5.814247 |
| H | -1.943085 | 2.665948  | 7.181114 |
| H | -0.231528 | 2.991416  | 6.831899 |

## 18

|                                                              |                       |
|--------------------------------------------------------------|-----------------------|
| Sum of electronic and zero-point Energies=                   | -2638.228628          |
| Sum of electronic and thermal Energies=                      | -2638.211225          |
| Sum of electronic and thermal Enthalpies=                    | -2638.210281          |
| Sum of electronic and thermal Free Energies=                 | -2638.279312          |
| $\langle \text{psi}(f)   H   \text{psi}(f) \rangle$          | (a.u.) = -2638.400723 |
| $\langle \text{psi}(f)   H + V(f)/2   \text{psi}(f) \rangle$ | (a.u.) = -2638.439643 |
| Total free energy in solution:                               |                       |
| with all non electrostatic terms                             | (a.u.) = -2638.413782 |

|    |           |           |           |
|----|-----------|-----------|-----------|
| C  | 0.067814  | -0.142780 | -0.108108 |
| N  | -0.098821 | 0.097862  | 1.216560  |
| C  | 1.119615  | 0.326146  | 1.833463  |
| C  | 2.067319  | 0.216793  | 0.870562  |
| N  | 1.404360  | -0.063132 | -0.311904 |
| C  | -1.388454 | 0.168973  | 1.901758  |
| C  | 2.077215  | -0.299104 | -1.592800 |
| Cu | -1.331582 | -0.576299 | -1.481077 |
| F  | -0.498114 | 0.438037  | -2.828938 |
| Cl | -2.162381 | -2.402601 | -0.400250 |
| H  | 3.138525  | 0.309375  | 0.922469  |
| H  | 1.203306  | 0.544778  | 2.884155  |
| H  | -2.080807 | -0.514693 | 1.414134  |
| H  | -1.254613 | -0.140837 | 2.938392  |
| H  | -1.777868 | 1.189306  | 1.875962  |
| H  | 1.366127  | -0.078264 | -2.389565 |
| H  | 2.936308  | 0.369018  | -1.664837 |
| H  | 2.416652  | -1.335765 | -1.649629 |
| N  | -3.092096 | -0.415053 | -2.607958 |
| C  | -3.976145 | -0.448289 | -3.338485 |
| C  | -5.091493 | -0.500204 | -4.266538 |
| H  | -5.464612 | -1.523745 | -4.338783 |
| H  | -5.898118 | 0.147525  | -3.917700 |
| H  | -4.768368 | -0.165780 | -5.254216 |

**Cu<sup>0</sup>F**

|    |          |          |           |
|----|----------|----------|-----------|
| Cu | 0.000000 | 0.000000 | -0.006632 |
| F  | 0.000000 | 0.000000 | 1.874508  |

### **Cu<sup>0</sup>**

|                                              |                       |
|----------------------------------------------|-----------------------|
| Sum of electronic and zero-point Energies=   | -1640.472257          |
| Sum of electronic and thermal Energies=      | -1640.470841          |
| Sum of electronic and thermal Enthalpies=    | -1640.469897          |
| Sum of electronic and thermal Free Energies= | -1640.488767          |
| <psi(f)  H  psi(f)>                          | (a.u.) = -1640.472204 |
| <psi(f) H+V(f)/2 psi(f)>                     | (a.u.) = -1640.473461 |
| Total free energy in solution:               |                       |
| with all non electrostatic terms             | (a.u.) = -1640.466967 |

### **Cu<sup>0</sup>(MeCN)**

|                                              |                       |
|----------------------------------------------|-----------------------|
| Sum of electronic and zero-point Energies=   | -1773.231317          |
| Sum of electronic and thermal Energies=      | -1773.225407          |
| Sum of electronic and thermal Enthalpies=    | -1773.224463          |
| Sum of electronic and thermal Free Energies= | -1773.263949          |
| <psi(f)  H  psi(f)>                          | (a.u.) = -1773.274884 |
| <psi(f) H+V(f)/2 psi(f)>                     | (a.u.) = -1773.284076 |
| Total free energy in solution:               |                       |
| with all non electrostatic terms             | (a.u.) = -1773.271405 |

|    |           |           |           |
|----|-----------|-----------|-----------|
| C  | 0.001545  | -0.000072 | 0.010406  |
| C  | 0.007994  | 0.000976  | 1.462869  |
| N  | 0.042369  | 0.002465  | 2.616595  |
| Cu | 0.930887  | -0.000937 | 4.433447  |
| H  | -0.585528 | -0.842140 | -0.361794 |
| H  | -0.436123 | 0.928118  | -0.362705 |
| H  | 1.023513  | -0.086541 | -0.367411 |

### **Cu<sup>0</sup>(MeCN)<sub>2</sub>**

|                                              |                       |
|----------------------------------------------|-----------------------|
| Sum of electronic and zero-point Energies=   | -1905.997152          |
| Sum of electronic and thermal Energies=      | -1905.986533          |
| Sum of electronic and thermal Enthalpies=    | -1905.985589          |
| Sum of electronic and thermal Free Energies= | -1906.037347          |
| <psi(f)  H  psi(f)>                          | (a.u.) = -1906.081731 |
| <psi(f) H+V(f)/2 psi(f)>                     | (a.u.) = -1906.105859 |
| Total free energy in solution:               |                       |
| with all non electrostatic terms             | (a.u.) = -1906.087375 |

|    |           |           |           |
|----|-----------|-----------|-----------|
| C  | -0.048360 | 0.004246  | 0.076708  |
| C  | 0.085263  | -0.006458 | 1.520591  |
| N  | 0.123841  | -0.011927 | 2.676436  |
| Cu | 0.050291  | -0.014558 | 4.514122  |
| N  | 0.108622  | -0.023742 | 6.316409  |
| C  | -0.023229 | -0.021106 | 7.510710  |
| C  | -1.172787 | 0.033154  | 8.472079  |
| H  | -1.104785 | 0.019295  | -0.210941 |
| H  | 0.441718  | 0.888324  | -0.337274 |
| H  | 0.420043  | -0.885578 | -0.349937 |
| H  | -2.135004 | 0.083876  | 7.939179  |
| H  | -1.159269 | -0.850652 | 9.114462  |
| H  | -1.070555 | 0.905883  | 9.121559  |

### $\text{Cu}^0(\text{MeCN})_3$

Sum of electronic and zero-point Energies= -2038.747849  
 Sum of electronic and thermal Energies= -2038.731500  
 Sum of electronic and thermal Enthalpies= -2038.730556  
 Sum of electronic and thermal Free Energies= -2038.799169  
 $\langle \text{psi}(f) | \text{H} | \text{psi}(f) \rangle$  (a.u.) = -2038.875698  
 $\langle \text{psi}(f) | \text{H} + \text{V}(f) / 2 | \text{psi}(f) \rangle$  (a.u.) = -2038.909134  
 Total free energy in solution:  
 with all non electrostatic terms (a.u.) = -2038.882446

|    |           |           |           |
|----|-----------|-----------|-----------|
| C  | 0.005961  | 0.068632  | 0.075701  |
| C  | 0.023301  | 0.041350  | 1.575385  |
| N  | 0.845746  | 0.003418  | 2.444312  |
| Cu | 2.259221  | -0.054537 | 3.663057  |
| N  | 2.976029  | -1.726623 | 4.432417  |
| C  | 3.337229  | -2.774641 | 4.755835  |
| C  | 3.806042  | -4.102870 | 5.108934  |
| N  | 3.078042  | 1.541719  | 4.485017  |
| C  | 3.511347  | 2.550952  | 4.841692  |
| C  | 4.072377  | 3.830970  | 5.235951  |
| H  | -0.553445 | -0.787739 | -0.308630 |
| H  | -0.499591 | 0.971043  | -0.276649 |
| H  | 1.031253  | 0.044721  | -0.330136 |
| H  | 2.956204  | -4.766992 | 5.281556  |
| H  | 4.414228  | -4.517005 | 4.298965  |
| H  | 4.410673  | -4.064167 | 6.017553  |
| H  | 4.684179  | 3.718135  | 6.133524  |
| H  | 4.697062  | 4.233558  | 4.432701  |
| H  | 3.271352  | 4.543467  | 5.445191  |

**Calculated energies and coordinates (B3LYP/6-311+G\*\*// B3LYP/6-311+G\*\*//B3LYP/LANL2DZ):**

**3**

LANL2DZ:

Electronic energy = -515.979460826  
Sum of electronic and zero-point Energies= -515.848580  
Sum of electronic and thermal Energies= -515.837915  
Sum of electronic and thermal Enthalpies= -515.836971  
Sum of electronic and thermal Free Energies= -515.887116

6-311+G\*\*:

$\langle \psi(f) | H | \psi(f) \rangle$  (a.u.) = -2405.736092  
 $\langle \psi(f) | H + V(f)/2 | \psi(f) \rangle$  (a.u.) = -2405.767052  
Total free energy in solution:  
with all non electrostatic terms (a.u.) = -2405.748824

|    |           |           |           |
|----|-----------|-----------|-----------|
| C  | -0.020222 | -0.046213 | -0.014913 |
| N  | -0.002116 | 0.000614  | 1.365147  |
| C  | 1.309600  | 0.074166  | 1.856122  |
| C  | 2.139424  | 0.073477  | 0.763094  |
| N  | 1.313968  | -0.000481 | -0.368373 |
| C  | -1.206465 | -0.022290 | 2.207748  |
| C  | 1.801918  | -0.024811 | -1.754831 |
| Cu | -1.543559 | -0.145518 | -1.171357 |
| Cl | -3.275987 | -0.258608 | -2.486532 |
| H  | 3.214740  | 0.117508  | 0.701597  |
| H  | 1.539361  | 0.118903  | 2.908374  |
| H  | -2.083364 | -0.088847 | 1.560085  |
| H  | -1.189726 | -0.891182 | 2.874761  |
| H  | -1.273331 | 0.894187  | 2.804267  |
| H  | 0.942382  | -0.091237 | -2.425379 |
| H  | 2.359211  | 0.891079  | -1.980237 |
| H  | 2.448245  | -0.894311 | -1.917291 |

**4**

LANL2DZ:

Electronic energy = -498.663418322  
Sum of electronic and zero-point Energies= -498.441766  
Sum of electronic and thermal Energies= -498.431821  
Sum of electronic and thermal Enthalpies= -498.430877

Sum of electronic and thermal Free Energies= -498.477052

6-311+G\*\*:

<psi(f)| H |psi(f)> (a.u.) = -944.120943  
<psi(f)|H+V(f)/2|psi(f)> (a.u.) = -944.412844  
Total free energy in solution:  
with all non electrostatic terms (a.u.) = -944.401246

|    |           |           |           |
|----|-----------|-----------|-----------|
| C  | -1.047266 | 1.025197  | -0.979573 |
| C  | -1.404767 | 2.452930  | -0.461939 |
| H  | -0.782985 | 1.029371  | -2.040127 |
| H  | -1.888007 | 0.343404  | -0.827703 |
| H  | -1.578257 | 3.154663  | -1.281825 |
| H  | -2.266265 | 2.468050  | 0.209647  |
| C  | 1.419593  | 1.315422  | -0.599411 |
| H  | 2.237574  | 1.029005  | 0.063132  |
| H  | 1.692297  | 1.049555  | -1.623772 |
| C  | 1.082402  | 2.835300  | -0.495554 |
| H  | 1.864986  | 3.392827  | 0.025391  |
| H  | 0.891840  | 3.305707  | -1.462975 |
| C  | -0.060664 | 2.201927  | 1.654466  |
| H  | 0.873980  | 2.526444  | 2.117610  |
| H  | -0.897899 | 2.496334  | 2.292546  |
| C  | -0.089012 | 0.680514  | 1.317607  |
| H  | 0.684128  | 0.147239  | 1.874715  |
| H  | -1.059789 | 0.229921  | 1.540035  |
| F  | -0.410775 | 4.350094  | 0.628326  |
| C  | 0.355828  | -1.012753 | -0.540533 |
| H  | -0.510005 | -1.554857 | -0.157952 |
| H  | 0.450255  | -1.102541 | -1.623405 |
| Cl | 1.862530  | -1.703260 | 0.236996  |
| N  | -0.196216 | 2.943164  | 0.327994  |
| N  | 0.174964  | 0.488708  | -0.194125 |

**TS<sub>3</sub>**

LANL2DZ:

Electronic energy = -1014.71676194  
Sum of electronic and zero-point Energies= -1014.365128  
Sum of electronic and thermal Energies= -1014.342545  
Sum of electronic and thermal Enthalpies= -1014.341601  
Sum of electronic and thermal Free Energies= -1014.422326



6-311+G\*\*:

$\langle \text{psi}(f) | H | \text{psi}(f) \rangle$  (a.u.) = -3349.929152  
 $\langle \text{psi}(f) | H + V(f)/2 | \text{psi}(f) \rangle$  (a.u.) = -3350.171640  
Total free energy in solution:  
with all non electrostatic terms (a.u.) = -3350.139519

|    |           |           |           |
|----|-----------|-----------|-----------|
| N  | -0.063532 | 0.116465  | 0.102371  |
| C  | 0.078830  | 0.245055  | 1.639784  |
| C  | 1.585133  | -0.001430 | 2.022221  |
| N  | 2.279083  | -0.477808 | 0.807214  |
| C  | 1.680784  | -1.714192 | 0.262707  |
| C  | 0.269118  | -1.334433 | -0.323489 |
| C  | 2.409376  | 0.587594  | -0.215183 |
| C  | 0.956728  | 1.075336  | -0.569001 |
| C  | -1.466282 | 0.524076  | -0.366918 |
| Cl | -2.781392 | -0.484114 | 0.429248  |
| F  | 4.289985  | -0.672853 | 1.431076  |
| Cu | 5.590781  | 0.630111  | 1.705001  |
| F  | 5.102201  | 2.338469  | 1.329276  |
| C  | 7.202046  | -0.263228 | 2.249124  |
| N  | 7.492259  | -1.562510 | 2.551095  |
| C  | 8.848144  | -1.668152 | 2.890219  |
| C  | 9.392913  | -0.410035 | 2.782995  |
| N  | 8.364650  | 0.450681  | 2.379540  |
| C  | 6.556676  | -2.707544 | 2.551395  |
| C  | 8.549552  | 1.905853  | 2.148492  |
| H  | 9.302016  | -2.603109 | 3.177472  |
| H  | 10.399569 | -0.066250 | 2.960653  |
| H  | 8.905896  | 2.378582  | 3.067872  |
| H  | 9.280010  | 2.058548  | 1.349192  |
| H  | 7.602257  | 2.367707  | 1.858162  |
| H  | 6.477386  | -3.116964 | 3.562826  |
| H  | 5.576739  | -2.368796 | 2.214137  |
| H  | 6.927851  | -3.481767 | 1.873662  |
| H  | 1.661965  | -0.754219 | 2.809429  |
| H  | 2.062981  | 0.917358  | 2.367774  |
| H  | -0.588787 | -0.490866 | 2.090193  |
| H  | -0.255425 | 1.246925  | 1.921589  |
| H  | 1.592189  | -2.452540 | 1.062329  |
| H  | 2.323599  | -2.121957 | -0.520236 |
| H  | 0.258822  | -1.357205 | -1.416604 |
| H  | -0.519600 | -1.986414 | 0.055902  |
| H  | 0.773216  | 1.060915  | -1.646528 |

|   |           |          |           |
|---|-----------|----------|-----------|
| H | 0.759204  | 2.079180 | -0.183546 |
| H | 2.915453  | 0.179198 | -1.092442 |
| H | 3.008431  | 1.409986 | 0.181312  |
| H | -1.530912 | 0.366876 | -1.443699 |
| H | -1.632742 | 1.567006 | -0.097302 |
